# Supplementary material for: Assessment of Emissions and Potential Occupational Exposure to Carbon Monoxide during Biowaste Composting
Source: Preprints.org preprint supplement (doi:10.20944/preprints202306.1586.v1), 2023-06-22
Supplement: Supplementary file 1 [file supplementary]

## Sheet: D1
					Temperature inside flux chamber, K	Volume of 1 mole of CO in standard conditions (0 deg C, 1 atm), L	Molecular weight of CO, g/mol	Emitting area enclosed by flux chamber (chamber footprint, A), m2	Volume of flux chamber (V), m3	dC/dt (slope)
					293	22.4	28	0.23	0.071	0.0612
Time (t), s	Measured concentration of CO, ppm	(C) measured CO concentration adjusted to standard conditions (0 deg C, 1 atm), mg/m3
0	0	0
5	3	3.49403
10	3	3.49403
15	3	3.49403
20	3	3.49403
25	4	4.6587
30	4	4.6587
35	4	4.6587
40	4	4.6587
45	4	4.6587
50	4	4.6587
55	5	5.82338
60	5	5.82338
65	5	5.82338
70	5	5.82338
75	6	6.98805
80	6	6.98805
85	6	6.98805			Q=(V/A)*(dC/dt)			where: Q - CO flux, mg/m2/s
90	6	6.98805						V - flux chamber volume, m3
95	7	8.15273						A - flux chamber footprint, m2
100	7	8.15273			Q=	0.0188922	mg CO/m2/s	dC/dt - rate of change of CO concentration in the flux chamber with time (from the chart), mg/m3/s
105	7	8.15273				68.0118	mg CO/m2/h
110	7	8.15273
115	8	9.31741
120	8	9.31741
125	8	9.31741
130	9	10.4821
135	9	10.4821
140	9	10.4821
145	9	10.4821
150	9	10.4821
155	11	12.8114
160	11	12.8114
165	11	12.8114
170	12	13.9761
175	12	13.9761
180	12	13.9761
185	12	13.9761
190	13	15.1408
195	13	15.1408
200	13	15.1408
205	13	15.1408
210	14	16.3055
215	14	16.3055
220	14	16.3055
225	14	16.3055
230	15	17.4701
235	15	17.4701
240	15	17.4701
245	15	17.4701
250	15	17.4701
255	16	18.6348
260	16	18.6348
265	16	18.6348
270	16	18.6348
275	16	18.6348
280	16	18.6348
285	16	18.6348
290	16	18.6348
295	16	18.6348
300	16	18.6348

## Sheet: D2
					Temperature inside flux chamber, K	Volume of 1 mole of CO in standard conditions (0 deg C, 1 atm), L	Molecular weight of CO, g/mol	Emitting area enclosed by flux chamber (chamber footprint, A), m2	Volume of flux chamber (V), m3	dC/dt (slope)
					293	22.4	28	0.23	0.071	0.0981
Time (t), s	Measured concentration of CO, ppm	(C) measured CO concentration adjusted to standard conditions (0 deg C, 1 atm), mg/m3
0	0	0
5	2	2.32935
10	2	2.32935
15	2	2.32935
20	2	2.32935
25	2	2.32935
30	2	2.32935
35	2	2.32935
40	3	3.49403
45	3	3.49403
50	3	3.49403
55	2	2.32935
60	2	2.32935
65	2	2.32935
70	2	2.32935
75	3	3.49403
80	3	3.49403
85	3	3.49403			Q=(V/A)*(dC/dt)			where: Q - CO flux, mg/m2/s
90	3	3.49403						V - flux chamber volume, m3
95	3	3.49403						A - flux chamber footprint, m2
100	4	4.6587			Q=	0.030283	mg CO/m2/s	dC/dt - rate of change of CO concentration in the flux chamber with time (from the chart), mg/m3/s
105	4	4.6587				109.019	mg CO/m2/h
110	4	4.6587
115	5	5.82338
120	5	5.82338
125	6	6.98805
130	6	6.98805
135	6	6.98805
140	6	6.98805
145	8	9.31741
150	9	10.4821
155	11	12.8114
160	11	12.8114
165	12	13.9761
170	12	13.9761
175	13	15.1408
180	13	15.1408
185	13	15.1408
190	15	17.4701
195	15	17.4701
200	16	18.6348
205	16	18.6348
210	16	18.6348
215	17	19.7995
220	17	19.7995
225	20	23.2935
230	20	23.2935
235	19	22.1288
240	19	22.1288
245	19	22.1288
250	19	22.1288
255	20	23.2935
260	21	24.4582
265	21	24.4582
270	21	24.4582
275	22	25.6229
280	22	25.6229
285	22	25.6229
290	22	25.6229
295	22	25.6229
300	22	25.6229

## Sheet: D3
					Temperature inside flux chamber, K	Volume of 1 mole of CO in standard conditions (0 deg C, 1 atm), L	Molecular weight of CO, g/mol	Emitting area enclosed by flux chamber (chamber footprint, A), m2	Volume of flux chamber (V), m3	dC/dt (slope)
					293	22.4	28	0.23	0.071	0.0704
Time (t), s	Measured concentration of CO, ppm	(C) measured CO concentration adjusted to standard conditions (0 deg C, 1 atm), mg/m3
0	0	0
5	2	2.32935
10	2	2.32935
15	2	2.32935
20	2	2.32935
25	2	2.32935
30	2	2.32935
35	2	2.32935
40	2	2.32935
45	2	2.32935
50	3	3.49403
55	3	3.49403
60	3	3.49403
65	3	3.49403
70	3	3.49403
75	3	3.49403
80	4	4.6587
85	4	4.6587			Q=(V/A)*(dC/dt)			where: Q - CO flux, mg/m2/s
90	4	4.6587						V - flux chamber volume, m3
95	5	5.82338						A - flux chamber footprint, m2
100	5	5.82338			Q=	0.0217322	mg CO/m2/s	dC/dt - rate of change of CO concentration in the flux chamber with time (from the chart), mg/m3/s
105	5	5.82338				78.2358	mg CO/m2/h
110	6	6.98805
115	6	6.98805
120	6	6.98805
125	7	8.15273
130	7	8.15273
135	7	8.15273
140	8	9.31741
145	8	9.31741
150	8	9.31741
155	9	10.4821
160	9	10.4821
165	9	10.4821
170	9	10.4821
175	11	12.8114
180	11	12.8114
185	12	13.9761
190	12	13.9761
195	12	13.9761
200	13	15.1408
205	13	15.1408
210	13	15.1408
215	13	15.1408
220	14	16.3055
225	14	16.3055
230	14	16.3055
235	14	16.3055
240	15	17.4701
245	15	17.4701
250	15	17.4701
255	15	17.4701
260	16	18.6348
265	16	18.6348
270	16	18.6348
275	16	18.6348
280	17	19.7995
285	17	19.7995
290	17	19.7995
295	17	19.7995
300	17	19.7995

## Sheet: D4
					Temperature inside flux chamber, K	Volume of 1 mole of CO in standard conditions (0 deg C, 1 atm), L	Molecular weight of CO, g/mol	Emitting area enclosed by flux chamber (chamber footprint, A), m2	Volume of flux chamber (V), m3	dC/dt (slope)
					293	22.4	28	0.23	0.071	0.0685
Time (t), s	Measured concentration of CO, ppm	(C) measured CO concentration adjusted to standard conditions (0 deg C, 1 atm), mg/m3
0	0	0
5	0	0
10	0	0
15	0	0
20	0	0
25	0	0
30	0	0
35	0	0
40	0	0
45	1	1.16468
50	1	1.16468
55	1	1.16468
60	2	2.32935
65	2	2.32935
70	2	2.32935
75	2	2.32935
80	3	3.49403
85	3	3.49403			Q=(V/A)*(dC/dt)			where: Q - CO flux, mg/m2/s
90	3	3.49403						V - flux chamber volume, m3
95	4	4.6587						A - flux chamber footprint, m2
100	4	4.6587			Q=	0.0211457	mg CO/m2/s	dC/dt - rate of change of CO concentration in the flux chamber with time (from the chart), mg/m3/s
105	4	4.6587				76.1243	mg CO/m2/h
110	5	5.82338
115	5	5.82338
120	5	5.82338
125	6	6.98805
130	6	6.98805
135	6	6.98805
140	7	8.15273
145	7	8.15273
150	7	8.15273
155	8	9.31741
160	8	9.31741
165	9	10.4821
170	9	10.4821
175	9	10.4821
180	10	11.6468
185	10	11.6468
190	10	11.6468
195	11	12.8114
200	11	12.8114
205	11	12.8114
210	11	12.8114
215	12	13.9761
220	12	13.9761
225	12	13.9761
230	13	15.1408
235	13	15.1408
240	13	15.1408
245	13	15.1408
250	13	15.1408
255	14	16.3055
260	14	16.3055
265	14	16.3055
270	14	16.3055
275	14	16.3055
280	15	17.4701
285	15	17.4701
290	15	17.4701
295	15	17.4701
300	15	17.4701

## Sheet: D5
					Temperature inside flux chamber, K	Volume of 1 mole of CO in standard conditions (0 deg C, 1 atm), L	Molecular weight of CO, g/mol	Emitting area enclosed by flux chamber (chamber footprint, A), m2	Volume of flux chamber (V), m3	dC/dt (slope)
					293	22.4	28	0.23	0.071	0.0919
Time (t), s	Measured concentration of CO, ppm	(C) measured CO concentration adjusted to standard conditions (0 deg C, 1 atm), mg/m3
0	0	0
5	2	2.32935
10	2	2.32935
15	2	2.32935
20	4	4.6587
25	4	4.6587
30	4	4.6587
35	5	5.82338
40	5	5.82338
45	6	6.98805
50	6	6.98805
55	6	6.98805
60	7	8.15273
65	7	8.15273
70	8	9.31741
75	8	9.31741
80	9	10.4821
85	9	10.4821			Q=(V/A)*(dC/dt)			where: Q - CO flux, mg/m2/s
90	10	11.6468						V - flux chamber volume, m3
95	10	11.6468						A - flux chamber footprint, m2
100	11	12.8114			Q=	0.0283691	mg CO/m2/s	dC/dt - rate of change of CO concentration in the flux chamber with time (from the chart), mg/m3/s
105	11	12.8114				102.129	mg CO/m2/h
110	11	12.8114
115	12	13.9761
120	12	13.9761
125	12	13.9761
130	13	15.1408
135	13	15.1408
140	13	15.1408
145	14	16.3055
150	14	16.3055
155	14	16.3055
160	15	17.4701
165	15	17.4701
170	15	17.4701
175	16	18.6348
180	16	18.6348
185	16	18.6348
190	18	20.9642
195	18	20.9642
200	18	20.9642
205	19	22.1288
210	19	22.1288
215	19	22.1288
220	20	23.2935
225	20	23.2935
230	20	23.2935
235	21	24.4582
240	22	25.6229
245	22	25.6229
250	22	25.6229
255	22	25.6229
260	23	26.7875
265	23	26.7875
270	23	26.7875
275	24	27.9522
280	24	27.9522
285	24	27.9522
290	24	27.9522
295	24	27.9522
300	24	27.9522

## Sheet: D6
					Temperature inside flux chamber, K	Volume of 1 mole of CO in standard conditions (0 deg C, 1 atm), L	Molecular weight of CO, g/mol	Emitting area enclosed by flux chamber (chamber footprint, A), m2	Volume of flux chamber (V), m3	dC/dt (slope)
					293	22.4	28	0.23	0.071	0.0759
Time (t), s	Measured concentration of CO, ppm	(C) measured CO concentration adjusted to standard conditions (0 deg C, 1 atm), mg/m3
0	0	0
5	1	1.16468
10	1	1.16468
15	1	1.16468
20	1	1.16468
25	1	1.16468
30	1	1.16468
35	2	2.32935
40	2	2.32935
45	3	3.49403
50	3	3.49403
55	3	3.49403
60	3	3.49403
65	4	4.6587
70	4	4.6587
75	4	4.6587
80	5	5.82338
85	5	5.82338			Q=(V/A)*(dC/dt)			where: Q - CO flux, mg/m2/s
90	5	5.82338						V - flux chamber volume, m3
95	6	6.98805						A - flux chamber footprint, m2
100	6	6.98805			Q=	0.02343	mg CO/m2/s	dC/dt - rate of change of CO concentration in the flux chamber with time (from the chart), mg/m3/s
105	6	6.98805				84.348	mg CO/m2/h
110	7	8.15273
115	7	8.15273
120	7	8.15273
125	8	9.31741
130	8	9.31741
135	8	9.31741
140	9	10.4821
145	9	10.4821
150	9	10.4821
155	10	11.6468
160	10	11.6468
165	11	12.8114
170	11	12.8114
175	11	12.8114
180	11	12.8114
185	12	13.9761
190	12	13.9761
195	12	13.9761
200	12	13.9761
205	14	16.3055
210	14	16.3055
215	14	16.3055
220	15	17.4701
225	15	17.4701
230	15	17.4701
235	15	17.4701
240	16	18.6348
245	16	18.6348
250	16	18.6348
255	17	19.7995
260	17	19.7995
265	17	19.7995
270	17	19.7995
275	18	20.9642
280	18	20.9642
285	18	20.9642
290	18	20.9642
295	18	20.9642
300	18	20.9642

## Sheet: D7
					Temperature inside flux chamber, K	Volume of 1 mole of CO in standard conditions (0 deg C, 1 atm), L	Molecular weight of CO, g/mol	Emitting area enclosed by flux chamber (chamber footprint, A), m2	Volume of flux chamber (V), m3	dC/dt (slope)
					293	22.4	28	0.23	0.071	0.0844
Time (t), s	Measured concentration of CO, ppm	(C) measured CO concentration adjusted to standard conditions (0 deg C, 1 atm), mg/m3
0	0	0
5	4	4.6587
10	4	4.6587
15	4	4.6587
20	4	4.6587
25	4	4.6587
30	5	5.82338
35	5	5.82338
40	6	6.98805
45	6	6.98805
50	7	8.15273
55	7	8.15273
60	7	8.15273
65	7	8.15273
70	8	9.31741
75	9	10.4821
80	9	10.4821
85	10	11.6468			Q=(V/A)*(dC/dt)			where: Q - CO flux, mg/m2/s
90	10	11.6468						V - flux chamber volume, m3
95	11	12.8114						A - flux chamber footprint, m2
100	11	12.8114			Q=	0.0260539	mg CO/m2/s	dC/dt - rate of change of CO concentration in the flux chamber with time (from the chart), mg/m3/s
105	12	13.9761				93.7941	mg CO/m2/h
110	12	13.9761
115	12	13.9761
120	13	15.1408
125	13	15.1408
130	13	15.1408
135	14	16.3055
140	14	16.3055
145	14	16.3055
150	15	17.4701
155	15	17.4701
160	15	17.4701
165	16	18.6348
170	16	18.6348
175	16	18.6348
180	17	19.7995
185	17	19.7995
190	18	20.9642
195	18	20.9642
200	18	20.9642
205	19	22.1288
210	19	22.1288
215	19	22.1288
220	20	23.2935
225	20	23.2935
230	20	23.2935
235	20	23.2935
240	21	24.4582
245	21	24.4582
250	21	24.4582
255	22	25.6229
260	22	25.6229
265	22	25.6229
270	22	25.6229
275	23	26.7875
280	23	26.7875
285	23	26.7875
290	23	26.7875
295	23	26.7875
300	23	26.7875

## Sheet: D8
					Temperature inside flux chamber, K	Volume of 1 mole of CO in standard conditions (0 deg C, 1 atm), L	Molecular weight of CO, g/mol	Emitting area enclosed by flux chamber (chamber footprint, A), m2	Volume of flux chamber (V), m3	dC/dt (slope)
					293	22.4	28	0.23	0.071	0.0961
Time (t), s	Measured concentration of CO, ppm	(C) measured CO concentration adjusted to standard conditions (0 deg C, 1 atm), mg/m3
0	0	0
5	3	3.49403
10	3	3.49403
15	3	3.49403
20	3	3.49403
25	3	3.49403
30	3	3.49403
35	3	3.49403
40	3	3.49403
45	4	4.6587
50	4	4.6587
55	5	5.82338
60	5	5.82338
65	5	5.82338
70	6	6.98805
75	6	6.98805
80	7	8.15273
85	7	8.15273			Q=(V/A)*(dC/dt)			where: Q - CO flux, mg/m2/s
90	8	9.31741						V - flux chamber volume, m3
95	8	9.31741						A - flux chamber footprint, m2
100	9	10.4821			Q=	0.0296657	mg CO/m2/s	dC/dt - rate of change of CO concentration in the flux chamber with time (from the chart), mg/m3/s
105	9	10.4821				106.796	mg CO/m2/h
110	10	11.6468
115	11	12.8114
120	12	13.9761
125	12	13.9761
130	13	15.1408
135	13	15.1408
140	13	15.1408
145	13	15.1408
150	15	17.4701
155	15	17.4701
160	15	17.4701
165	16	18.6348
170	16	18.6348
175	17	19.7995
180	17	19.7995
185	18	20.9642
190	18	20.9642
195	18	20.9642
200	19	22.1288
205	19	22.1288
210	19	22.1288
215	20	23.2935
220	20	23.2935
225	20	23.2935
230	21	24.4582
235	21	24.4582
240	21	24.4582
245	22	25.6229
250	22	25.6229
255	22	25.6229
260	22	25.6229
265	23	26.7875
270	23	26.7875
275	23	26.7875
280	23	26.7875
285	23	26.7875
290	23	26.7875
295	23	26.7875
300	23	26.7875

## Sheet: D9
					Temperature inside flux chamber, K	Volume of 1 mole of CO in standard conditions (0 deg C, 1 atm), L	Molecular weight of CO, g/mol	Emitting area enclosed by flux chamber (chamber footprint, A), m2	Volume of flux chamber (V), m3	dC/dt (slope)
					293	22.4	28	0.23	0.071	0.0917
Time (t), s	Measured concentration of CO, ppm	(C) measured CO concentration adjusted to standard conditions (0 deg C, 1 atm), mg/m3
0	0	0
5	2	2.32935
10	2	2.32935
15	2	2.32935
20	2	2.32935
25	2	2.32935
30	2	2.32935
35	2	2.32935
40	3	3.49403
45	3	3.49403
50	3	3.49403
55	3	3.49403
60	3	3.49403
65	5	5.82338
70	5	5.82338
75	5	5.82338
80	6	6.98805
85	6	6.98805			Q=(V/A)*(dC/dt)			where: Q - CO flux, mg/m2/s
90	6	6.98805						V - flux chamber volume, m3
95	7	8.15273						A - flux chamber footprint, m2
100	7	8.15273			Q=	0.0283074	mg CO/m2/s	dC/dt - rate of change of CO concentration in the flux chamber with time (from the chart), mg/m3/s
105	7	8.15273				101.907	mg CO/m2/h
110	8	9.31741
115	8	9.31741
120	9	10.4821
125	9	10.4821
130	9	10.4821
135	10	11.6468
140	11	12.8114
145	12	13.9761
150	12	13.9761
155	13	15.1408
160	13	15.1408
165	13	15.1408
170	13	15.1408
175	14	16.3055
180	14	16.3055
185	15	17.4701
190	15	17.4701
195	16	18.6348
200	16	18.6348
205	16	18.6348
210	17	19.7995
215	17	19.7995
220	18	20.9642
225	18	20.9642
230	18	20.9642
235	19	22.1288
240	19	22.1288
245	19	22.1288
250	19	22.1288
255	20	23.2935
260	20	23.2935
265	20	23.2935
270	22	25.6229
275	22	25.6229
280	22	25.6229
285	22	25.6229
290	22	25.6229
295	22	25.6229
300	22	25.6229

## Sheet: Modelling
Modelling of CO emission				Notes
Surface of the pile (Ap)		300	m2
Time (t)		3600	s	Accumulation of CO in airtight hall during time (t)
Headspace volume in the hall		1000	m3	Assumption: the hall is airtight
Number of piles in the hall (n)		4	-
Emitted CO mass in time (t)		109382	mg	Estimated as a product of (averaged flux at D1-D9 locations), Ap, t, and n
		109.382	g	Conversion from mg to g
Concentration of accumulated CO in the hall headspace during 1 hour, estimated for the 'after' turning scenario		109.382	mg/m3
Molecular weight of CO		28	g/mol
Air temperature in the hall		20	deg C
Ambient pressure		1	atm
Volume of 1 mole of CO in standard conditions (0 deg C, 1 atm)		22.4	L
Concentration of accumulated CO in the hall headspace during 1 hour, estimated for the 'after' turning scenario		127.395	ppm
Concentration of accumulated CO in the hall headspace during 1 hour, estimated for the 'after' turning scenario		0.0127395	%
