# Supplementary material for: Assessment of Emissions and Potential Occupational Exposure to Carbon Monoxide during Biowaste Composting
Source: Preprints.org preprint supplement (doi:10.20944/preprints202306.1586.v1), 2023-06-22
Supplement: Supplementary file 2 [file Pile 1.1 after turning.xlsx]

## Sheet: D1
					Temperature inside flux chamber, K	Volume of 1 mole of CO in standard conditions (0 deg C, 1 atm), L	Molecular weight of CO, g/mol	Emitting area enclosed by flux chamber (chamber footprint, A), m2	Volume of flux chamber (V), m3	dC/dt (slope)
					293	22.4	28	0.23	0.071	0.1216
Time (t), s	Measured concentration of CO, ppm	(C) measured CO concentration adjusted to standard conditions (0 deg C, 1 atm), mg/m3
0	0	0
5	1	1.16468
10	1	1.16468
15	1	1.16468
20	1	1.16468
25	1	1.16468
30	1	1.16468
35	1	1.16468
40	1	1.16468
45	5	5.82338
50	5	5.82338
55	5	5.82338
60	5	5.82338
65	5	5.82338
70	5	5.82338
75	5	5.82338
80	5	5.82338
85	5	5.82338			Q=(V/A)*(dC/dt)			where: Q - CO flux, mg/m2/s
90	5	5.82338						V - flux chamber volume, m3
95	8	9.31741						A - flux chamber footprint, m2
100	8	9.31741			Q=	0.0375374	mg CO/m2/s	dC/dt - rate of change of CO concentration in the flux chamber with time (from the chart), mg/m3/s
105	8	9.31741				135.135	mg CO/m2/h
110	8	9.31741
115	8	9.31741
120	8	9.31741
125	8	9.31741
130	8	9.31741
135	8	9.31741
140	8	9.31741
145	12	13.9761
150	12	13.9761
155	12	13.9761
160	12	13.9761
165	12	13.9761
170	12	13.9761
175	12	13.9761
180	12	13.9761
185	19	22.1288
190	19	22.1288
195	19	22.1288
200	19	22.1288
205	19	22.1288
210	19	22.1288
215	19	22.1288
220	19	22.1288
225	19	22.1288
230	19	22.1288
235	19	22.1288
240	19	22.1288
245	19	22.1288
250	25	29.1169
255	25	29.1169
260	25	29.1169
265	25	29.1169
270	25	29.1169
275	32	37.2696
280	32	37.2696
285	32	37.2696
290	32	37.2696
295	31	36.1049
300	31	36.1049

## Sheet: D2
					Temperature inside flux chamber, K	Volume of 1 mole of CO in standard conditions (0 deg C, 1 atm), L	Molecular weight of CO, g/mol	Emitting area enclosed by flux chamber (chamber footprint, A), m2	Volume of flux chamber (V), m3	dC/dt (slope)
					293	22.4	28	0.23	0.071	0.1754
Time (t), s	Measured concentration of CO, ppm	(C) measured CO concentration adjusted to standard conditions (0 deg C, 1 atm), mg/m3
0	0	0
5	4	4.6587
10	5	5.82338
15	6	6.98805
20	8	9.31741
25	13	15.1408
30	15	17.4701
35	16	18.6348
40	18	20.9642
45	21	24.4582
50	23	26.7875
55	23	26.7875
60	23	26.7875
65	25	29.1169
70	26	30.2816
75	28	32.6109
80	31	36.1049
85	35	40.7637			Q=(V/A)*(dC/dt)			where: Q - CO flux, mg/m2/s
90	35	40.7637						V - flux chamber volume, m3
95	35	40.7637						A - flux chamber footprint, m2
100	35	40.7637			Q=	0.0541452	mg CO/m2/s	dC/dt - rate of change of CO concentration in the flux chamber with time (from the chart), mg/m3/s
105	35	40.7637				194.923	mg CO/m2/h
110	35	40.7637
115	35	40.7637
120	35	40.7637
125	35	40.7637
130	35	40.7637
135	35	40.7637
140	35	40.7637
145	37	43.093
150	37	43.093
155	37	43.093
160	37	43.093
165	37	43.093
170	37	43.093
175	37	43.093
180	37	43.093
185	37	43.093
190	36	41.9283
195	36	41.9283
200	36	41.9283
205	36	41.9283
210	36	41.9283
215	36	41.9283
220	36	41.9283
225	36	41.9283
230	36	41.9283
235	36	41.9283
240	36	41.9283
245	40	46.587
250	40	46.587
255	43	50.0811
260	47	54.7398
265	52	60.5631
270	55	64.0572
275	60	69.8805
280	63	73.3746
285	63	73.3746
290	68	79.198
295	68	79.198
300	68	79.198

## Sheet: D3
					Temperature inside flux chamber, K	Volume of 1 mole of CO in standard conditions (0 deg C, 1 atm), L	Molecular weight of CO, g/mol	Emitting area enclosed by flux chamber (chamber footprint, A), m2	Volume of flux chamber (V), m3	dC/dt (slope)
					293	22.4	28	0.23	0.071	0.1231
Time (t), s	Measured concentration of CO, ppm	(C) measured CO concentration adjusted to standard conditions (0 deg C, 1 atm), mg/m3
0	0	0
5	2	2.32935
10	2	2.32935
15	2	2.32935
20	2	2.32935
25	5	5.82338
30	5	5.82338
35	5	5.82338
40	5	5.82338
45	7	8.15273
50	7	8.15273
55	8	9.31741
60	8	9.31741
65	9	10.4821
70	10	11.6468
75	12	13.9761
80	14	16.3055
85	14	16.3055			Q=(V/A)*(dC/dt)			where: Q - CO flux, mg/m2/s
90	14	16.3055						V - flux chamber volume, m3
95	14	16.3055						A - flux chamber footprint, m2
100	14	16.3055			Q=	0.0380004	mg CO/m2/s	dC/dt - rate of change of CO concentration in the flux chamber with time (from the chart), mg/m3/s
105	15	17.4701				136.802	mg CO/m2/h
110	15	17.4701
115	15	17.4701
120	16	18.6348
125	16	18.6348
130	17	19.7995
135	17	19.7995
140	17	19.7995
145	16	18.6348
150	16	18.6348
155	16	18.6348
160	16	18.6348
165	18	20.9642
170	18	20.9642
175	18	20.9642
180	19	22.1288
185	20	23.2935
190	20	23.2935
195	20	23.2935
200	23	26.7875
205	23	26.7875
210	24	27.9522
215	23	26.7875
220	24	27.9522
225	25	29.1169
230	25	29.1169
235	25	29.1169
240	25	29.1169
245	30	34.9403
250	30	34.9403
255	30	34.9403
260	30	34.9403
265	30	34.9403
270	33	38.4343
275	33	38.4343
280	33	38.4343
285	33	38.4343
290	33	38.4343
295	33	38.4343
300	33	38.4343

## Sheet: D4
					Temperature inside flux chamber, K	Volume of 1 mole of CO in standard conditions (0 deg C, 1 atm), L	Molecular weight of CO, g/mol	Emitting area enclosed by flux chamber (chamber footprint, A), m2	Volume of flux chamber (V), m3	dC/dt (slope)
					293	22.4	28	0.23	0.071	0.0021
Time (t), s	Measured concentration of CO, ppm	(C) measured CO concentration adjusted to standard conditions (0 deg C, 1 atm), mg/m3
0	0	0
5	0	0
10	0	0
15	0	0
20	0	0
25	0	0
30	0	0
35	0	0
40	1	1.16468
45	1	1.16468
50	1	1.16468
55	0	0
60	1	1.16468
65	0	0
70	0	0
75	1	1.16468
80	1	1.16468
85	1	1.16468			Q=(V/A)*(dC/dt)			where: Q - CO flux, mg/m2/s
90	1	1.16468						V - flux chamber volume, m3
95	0	0						A - flux chamber footprint, m2
100	0	0			Q=	0.000648261	mg CO/m2/s	dC/dt - rate of change of CO concentration in the flux chamber with time (from the chart), mg/m3/s
105	0	0				2.33374	mg CO/m2/h
110	0	0
115	0	0
120	0	0
125	0	0
130	0	0
135	0	0
140	0	0
145	2	2.32935
150	2	2.32935
155	2	2.32935
160	2	2.32935
165	2	2.32935
170	2	2.32935
175	2	2.32935
180	2	2.32935
185	2	2.32935
190	2	2.32935
195	2	2.32935
200	2	2.32935
205	2	2.32935
210	2	2.32935
215	2	2.32935
220	1	1.16468
225	1	1.16468
230	1	1.16468
235	1	1.16468
240	1	1.16468
245	0	0
250	0	0
255	0	0
260	1	1.16468
265	1	1.16468
270	0	0
275	0	0
280	0	0
285	0	0
290	0	0
295	0	0
300	0	0

## Sheet: D5
					Temperature inside flux chamber, K	Volume of 1 mole of CO in standard conditions (0 deg C, 1 atm), L	Molecular weight of CO, g/mol	Emitting area enclosed by flux chamber (chamber footprint, A), m2	Volume of flux chamber (V), m3	dC/dt (slope)
					293	22.4	28	0.23	0.071	-0.0019
Time (t), s	Measured concentration of CO, ppm	(C) measured CO concentration adjusted to standard conditions (0 deg C, 1 atm), mg/m3
0	0	0
5	0	0
10	0	0
15	0	0
20	0	0
25	0	0
30	1	1.16468
35	1	1.16468
40	1	1.16468
45	1	1.16468
50	1	1.16468
55	1	1.16468
60	1	1.16468
65	1	1.16468
70	1	1.16468
75	1	1.16468
80	1	1.16468
85	1	1.16468			Q=(V/A)*(dC/dt)			where: Q - CO flux, mg/m2/s
90	1	1.16468						V - flux chamber volume, m3
95	1	1.16468						A - flux chamber footprint, m2
100	1	1.16468			Q=	-0.000586522	mg CO/m2/s	dC/dt - rate of change of CO concentration in the flux chamber with time (from the chart), mg/m3/s
105	1	1.16468				-2.11148	mg CO/m2/h
110	1	1.16468
115	1	1.16468
120	1	1.16468
125	0	0
130	0	0
135	0	0
140	0	0
145	0	0
150	0	0
155	0	0
160	0	0
165	0	0
170	0	0
175	0	0
180	0	0
185	0	0
190	0	0
195	0	0
200	0	0
205	1	1.16468
210	1	1.16468
215	1	1.16468
220	2	2.32935
225	2	2.32935
230	1	1.16468
235	1	1.16468
240	0	0
245	0	0
250	0	0
255	0	0
260	0	0
265	0	0
270	0	0
275	0	0
280	0	0
285	0	0
290	0	0
295	0	0
300	0	0

## Sheet: D6
					Temperature inside flux chamber, K	Volume of 1 mole of CO in standard conditions (0 deg C, 1 atm), L	Molecular weight of CO, g/mol	Emitting area enclosed by flux chamber (chamber footprint, A), m2	Volume of flux chamber (V), m3	dC/dt (slope)
					293	22.4	28	0.23	0.071	0.0016
Time (t), s	Measured concentration of CO, ppm	(C) measured CO concentration adjusted to standard conditions (0 deg C, 1 atm), mg/m3
0	0	0
5	0	0
10	0	0
15	0	0
20	0	0
25	1	1.16468
30	1	1.16468
35	0	0
40	0	0
45	0	0
50	0	0
55	1	1.16468
60	1	1.16468
65	1	1.16468
70	1	1.16468
75	1	1.16468
80	1	1.16468
85	1	1.16468			Q=(V/A)*(dC/dt)			where: Q - CO flux, mg/m2/s
90	2	2.32935						V - flux chamber volume, m3
95	2	2.32935						A - flux chamber footprint, m2
100	2	2.32935			Q=	0.000493913	mg CO/m2/s	dC/dt - rate of change of CO concentration in the flux chamber with time (from the chart), mg/m3/s
105	2	2.32935				1.77809	mg CO/m2/h
110	3	3.49403
115	3	3.49403
120	4	4.6587
125	4	4.6587
130	4	4.6587
135	4	4.6587
140	4	4.6587
145	4	4.6587
150	4	4.6587
155	3	3.49403
160	3	3.49403
165	3	3.49403
170	3	3.49403
175	3	3.49403
180	3	3.49403
185	3	3.49403
190	3	3.49403
195	3	3.49403
200	2	2.32935
205	2	2.32935
210	2	2.32935
215	2	2.32935
220	2	2.32935
225	2	2.32935
230	2	2.32935
235	1	1.16468
240	1	1.16468
245	1	1.16468
250	1	1.16468
255	1	1.16468
260	1	1.16468
265	1	1.16468
270	1	1.16468
275	1	1.16468
280	0	0
285	0	0
290	0	0
295	0	0
300	0	0

## Sheet: D7
					Temperature inside flux chamber, K	Volume of 1 mole of CO in standard conditions (0 deg C, 1 atm), L	Molecular weight of CO, g/mol	Emitting area enclosed by flux chamber (chamber footprint, A), m2	Volume of flux chamber (V), m3	dC/dt (slope)
					293	22.4	28	0.23	0.071	-0.0048
Time (t), s	Measured concentration of CO, ppm	(C) measured CO concentration adjusted to standard conditions (0 deg C, 1 atm), mg/m3
0	0	0
5	1	1.16468
10	1	1.16468
15	1	1.16468
20	1	1.16468
25	1	1.16468
30	1	1.16468
35	2	2.32935
40	2	2.32935
45	2	2.32935
50	2	2.32935
55	2	2.32935
60	2	2.32935
65	2	2.32935
70	2	2.32935
75	2	2.32935
80	2	2.32935
85	2	2.32935			Q=(V/A)*(dC/dt)			where: Q - CO flux, mg/m2/s
90	2	2.32935						V - flux chamber volume, m3
95	2	2.32935						A - flux chamber footprint, m2
100	2	2.32935			Q=	-0.00148174	mg CO/m2/s	dC/dt - rate of change of CO concentration in the flux chamber with time (from the chart), mg/m3/s
105	2	2.32935				-5.33426	mg CO/m2/h
110	2	2.32935
115	1	1.16468
120	1	1.16468
125	1	1.16468
130	1	1.16468
135	1	1.16468
140	1	1.16468
145	1	1.16468
150	1	1.16468
155	1	1.16468
160	1	1.16468
165	1	1.16468
170	1	1.16468
175	1	1.16468
180	1	1.16468
185	0	0
190	0	0
195	0	0
200	0	0
205	0	0
210	0	0
215	0	0
220	0	0
225	0	0
230	0	0
235	0	0
240	1	1.16468
245	1	1.16468
250	1	1.16468
255	1	1.16468
260	1	1.16468
265	2	2.32935
270	2	2.32935
275	1	1.16468
280	1	1.16468
285	1	1.16468
290	0	0
295	0	0
300	0	0

## Sheet: D8
					Temperature inside flux chamber, K	Volume of 1 mole of CO in standard conditions (0 deg C, 1 atm), L	Molecular weight of CO, g/mol	Emitting area enclosed by flux chamber (chamber footprint, A), m2	Volume of flux chamber (V), m3	dC/dt (slope)
					293	22.4	28	0.23	0.071	-0.0044
Time (t), s	Measured concentration of CO, ppm	(C) measured CO concentration adjusted to standard conditions (0 deg C, 1 atm), mg/m3
0	0	0
5	0	0
10	0	0
15	0	0
20	0	0
25	2	2.32935
30	2	2.32935
35	2	2.32935
40	2	2.32935
45	2	2.32935
50	2	2.32935
55	2	2.32935
60	2	2.32935
65	2	2.32935
70	2	2.32935
75	2	2.32935
80	2	2.32935
85	2	2.32935			Q=(V/A)*(dC/dt)			where: Q - CO flux, mg/m2/s
90	2	2.32935						V - flux chamber volume, m3
95	2	2.32935						A - flux chamber footprint, m2
100	2	2.32935			Q=	-0.00135826	mg CO/m2/s	dC/dt - rate of change of CO concentration in the flux chamber with time (from the chart), mg/m3/s
105	2	2.32935				-4.88974	mg CO/m2/h
110	2	2.32935
115	1	1.16468
120	1	1.16468
125	1	1.16468
130	1	1.16468
135	1	1.16468
140	1	1.16468
145	1	1.16468
150	1	1.16468
155	1	1.16468
160	1	1.16468
165	1	1.16468
170	0	0
175	0	0
180	0	0
185	0	0
190	0	0
195	0	0
200	0	0
205	0	0
210	0	0
215	0	0
220	1	1.16468
225	1	1.16468
230	1	1.16468
235	1	1.16468
240	1	1.16468
245	1	1.16468
250	1	1.16468
255	1	1.16468
260	1	1.16468
265	1	1.16468
270	1	1.16468
275	1	1.16468
280	1	1.16468
285	0	0
290	0	0
295	0	0
300	0	0

## Sheet: D9
					Temperature inside flux chamber, K	Volume of 1 mole of CO in standard conditions (0 deg C, 1 atm), L	Molecular weight of CO, g/mol	Emitting area enclosed by flux chamber (chamber footprint, A), m2	Volume of flux chamber (V), m3	dC/dt (slope)
					293	22.4	28	0.23	0.071	0.0016
Time (t), s	Measured concentration of CO, ppm	(C) measured CO concentration adjusted to standard conditions (0 deg C, 1 atm), mg/m3
0	0	0
5	1	1.16468
10	1	1.16468
15	1	1.16468
20	1	1.16468
25	0	0
30	0	0
35	0	0
40	0	0
45	0	0
50	0	0
55	0	0
60	0	0
65	0	0
70	0	0
75	0	0
80	0	0
85	1	1.16468			Q=(V/A)*(dC/dt)			where: Q - CO flux, mg/m2/s
90	1	1.16468						V - flux chamber volume, m3
95	1	1.16468						A - flux chamber footprint, m2
100	1	1.16468			Q=	0.000493913	mg CO/m2/s	dC/dt - rate of change of CO concentration in the flux chamber with time (from the chart), mg/m3/s
105	1	1.16468				1.77809	mg CO/m2/h
110	1	1.16468
115	1	1.16468
120	1	1.16468
125	1	1.16468
130	1	1.16468
135	1	1.16468
140	2	2.32935
145	2	2.32935
150	2	2.32935
155	2	2.32935
160	2	2.32935
165	2	2.32935
170	2	2.32935
175	2	2.32935
180	2	2.32935
185	2	2.32935
190	2	2.32935
195	2	2.32935
200	2	2.32935
205	2	2.32935
210	2	2.32935
215	1	1.16468
220	1	1.16468
225	1	1.16468
230	1	1.16468
235	1	1.16468
240	1	1.16468
245	1	1.16468
250	1	1.16468
255	1	1.16468
260	1	1.16468
265	0	0
270	0	0
275	0	0
280	0	0
285	0	0
290	0	0
295	0	0
300	0	0

## Sheet: Modelling
Modelling of CO emission				Notes
Surface of the pile (Ap)		300	m2
Time (t)		3600	s	Accumulation of CO in airtight hall during time (t)
Headspace volume in the hall		1000	m3	Assumption: the hall is airtight
Number of piles in the hall (n)		4	-
Emitted CO mass in time (t)		61388.5	mg	Estimated as a product of (averaged flux at D1-D9 locations), Ap, t, and n
		61.3885	g	Conversion from mg to g
Concentration of accumulated CO in the hall headspace during 1 hour, estimated for the 'after' turning scenario		61.3885	mg/m3
Molecular weight of CO		28	g/mol
Air temperature in the hall		20	deg C
Ambient pressure		1	atm
Volume of 1 mole of CO in standard conditions (0 deg C, 1 atm)		22.4	L
Concentration of accumulated CO in the hall headspace during 1 hour, estimated for the 'after' turning scenario		71.4976	ppm
Concentration of accumulated CO in the hall headspace during 1 hour, estimated for the 'after' turning scenario		0.00714976	%
