# Supplementary material for: Assessment of Emissions and Potential Occupational Exposure to Carbon Monoxide during Biowaste Composting
Source: Preprints.org preprint supplement (doi:10.20944/preprints202306.1586.v1), 2023-06-22
Supplement: Supplementary file 6 [file Pile 1.2 after turning.xlsx]

## Sheet: D1
					Temperature inside flux chamber, K	Volume of 1 mole of CO in standard conditions (0 deg C, 1 atm), L	Molecular weight of CO, g/mol	Emitting area enclosed by flux chamber (chamber footprint, A), m2	Volume of flux chamber (V), m3	dC/dt (slope)
					293	22.4	28	0.23	0.071	0.0678
Time (t), s	Measured concentration of CO, ppm	(C) measured CO concentration adjusted to standard conditions (0 deg C, 1 atm), mg/m3
0	0	0
5	2	2.32935
10	2	2.32935
15	2	2.32935
20	2	2.32935
25	3	3.49403
30	3	3.49403
35	3	3.49403
40	4	4.6587
45	4	4.6587
50	4	4.6587
55	5	5.82338
60	5	5.82338
65	5	5.82338
70	6	6.98805
75	6	6.98805
80	6	6.98805
85	8	9.31741			Q=(V/A)*(dC/dt)			where: Q - CO flux, mg/m2/s
90	8	9.31741						V - flux chamber volume, m3
95	8	9.31741						A - flux chamber footprint, m2
100	9	10.4821			Q=	0.0209296	mg CO/m2/s	dC/dt - rate of change of CO concentration in the flux chamber with time (from the chart), mg/m3/s
105	9	10.4821				75.3464	mg CO/m2/h
110	9	10.4821
115	10	11.6468
120	10	11.6468
125	10	11.6468
130	11	12.8114
135	11	12.8114
140	11	12.8114
145	11	12.8114
150	11	12.8114
155	11	12.8114
160	11	12.8114
165	11	12.8114
170	11	12.8114
175	12	13.9761
180	12	13.9761
185	12	13.9761
190	13	15.1408
195	13	15.1408
200	13	15.1408
205	13	15.1408
210	14	16.3055
215	14	16.3055
220	14	16.3055
225	14	16.3055
230	15	17.4701
235	15	17.4701
240	15	17.4701
245	17	19.7995
250	17	19.7995
255	17	19.7995
260	17	19.7995
265	18	20.9642
270	18	20.9642
275	18	20.9642
280	18	20.9642
285	18	20.9642
290	18	20.9642
295	18	20.9642
300	18	20.9642

## Sheet: D2
					Temperature inside flux chamber, K	Volume of 1 mole of CO in standard conditions (0 deg C, 1 atm), L	Molecular weight of CO, g/mol	Emitting area enclosed by flux chamber (chamber footprint, A), m2	Volume of flux chamber (V), m3	dC/dt (slope)
					293	22.4	28	0.23	0.071	0.0532
Time (t), s	Measured concentration of CO, ppm	(C) measured CO concentration adjusted to standard conditions (0 deg C, 1 atm), mg/m3
0	0	0
5	3	3.49403
10	3	3.49403
15	3	3.49403
20	3	3.49403
25	3	3.49403
30	4	4.6587
35	4	4.6587
40	4	4.6587
45	4	4.6587
50	5	5.82338
55	5	5.82338
60	5	5.82338
65	4	4.6587
70	4	4.6587
75	4	4.6587
80	5	5.82338
85	5	5.82338			Q=(V/A)*(dC/dt)			where: Q - CO flux, mg/m2/s
90	5	5.82338						V - flux chamber volume, m3
95	5	5.82338						A - flux chamber footprint, m2
100	6	6.98805			Q=	0.0164226	mg CO/m2/s	dC/dt - rate of change of CO concentration in the flux chamber with time (from the chart), mg/m3/s
105	6	6.98805				59.1214	mg CO/m2/h
110	6	6.98805
115	6	6.98805
120	6	6.98805
125	7	8.15273
130	7	8.15273
135	7	8.15273
140	7	8.15273
145	8	9.31741
150	8	9.31741
155	8	9.31741
160	8	9.31741
165	8	9.31741
170	8	9.31741
175	9	10.4821
180	9	10.4821
185	9	10.4821
190	9	10.4821
195	10	11.6468
200	10	11.6468
205	10	11.6468
210	10	11.6468
215	12	13.9761
220	12	13.9761
225	12	13.9761
230	12	13.9761
235	12	13.9761
240	13	15.1408
245	13	15.1408
250	13	15.1408
255	14	16.3055
260	14	16.3055
265	15	17.4701
270	15	17.4701
275	15	17.4701
280	15	17.4701
285	15	17.4701
290	15	17.4701
295	15	17.4701
300	15	17.4701

## Sheet: D3
					Temperature inside flux chamber, K	Volume of 1 mole of CO in standard conditions (0 deg C, 1 atm), L	Molecular weight of CO, g/mol	Emitting area enclosed by flux chamber (chamber footprint, A), m2	Volume of flux chamber (V), m3	dC/dt (slope)
					293	22.4	28	0.23	0.071	0.0532
Time (t), s	Measured concentration of CO, ppm	(C) measured CO concentration adjusted to standard conditions (0 deg C, 1 atm), mg/m3
0	0	0
5	3	3.49403
10	3	3.49403
15	3	3.49403
20	3	3.49403
25	3	3.49403
30	4	4.6587
35	4	4.6587
40	4	4.6587
45	4	4.6587
50	5	5.82338
55	5	5.82338
60	5	5.82338
65	4	4.6587
70	4	4.6587
75	4	4.6587
80	5	5.82338
85	5	5.82338			Q=(V/A)*(dC/dt)			where: Q - CO flux, mg/m2/s
90	5	5.82338						V - flux chamber volume, m3
95	5	5.82338						A - flux chamber footprint, m2
100	6	6.98805			Q=	0.0164226	mg CO/m2/s	dC/dt - rate of change of CO concentration in the flux chamber with time (from the chart), mg/m3/s
105	6	6.98805				59.1214	mg CO/m2/h
110	6	6.98805
115	6	6.98805
120	6	6.98805
125	7	8.15273
130	7	8.15273
135	7	8.15273
140	7	8.15273
145	8	9.31741
150	8	9.31741
155	8	9.31741
160	8	9.31741
165	8	9.31741
170	8	9.31741
175	9	10.4821
180	9	10.4821
185	9	10.4821
190	9	10.4821
195	10	11.6468
200	10	11.6468
205	10	11.6468
210	10	11.6468
215	12	13.9761
220	12	13.9761
225	12	13.9761
230	12	13.9761
235	12	13.9761
240	13	15.1408
245	13	15.1408
250	13	15.1408
255	14	16.3055
260	14	16.3055
265	15	17.4701
270	15	17.4701
275	15	17.4701
280	15	17.4701
285	15	17.4701
290	15	17.4701
295	15	17.4701
300	15	17.4701

## Sheet: D4
					Temperature inside flux chamber, K	Volume of 1 mole of CO in standard conditions (0 deg C, 1 atm), L	Molecular weight of CO, g/mol	Emitting area enclosed by flux chamber (chamber footprint, A), m2	Volume of flux chamber (V), m3	dC/dt (slope)
					293	22.4	28	0.23	0.071	0.0613
Time (t), s	Measured concentration of CO, ppm	(C) measured CO concentration adjusted to standard conditions (0 deg C, 1 atm), mg/m3
0	0	0
5	0	0
10	0	0
15	0	0
20	0	0
25	0	0
30	0	0
35	0	0
40	2	2.32935
45	2	2.32935
50	2	2.32935
55	3	3.49403
60	3	3.49403
65	3	3.49403
70	3	3.49403
75	3	3.49403
80	5	5.82338
85	5	5.82338			Q=(V/A)*(dC/dt)			where: Q - CO flux, mg/m2/s
90	5	5.82338						V - flux chamber volume, m3
95	6	6.98805						A - flux chamber footprint, m2
100	6	6.98805			Q=	0.018923	mg CO/m2/s	dC/dt - rate of change of CO concentration in the flux chamber with time (from the chart), mg/m3/s
105	6	6.98805				68.123	mg CO/m2/h
110	6	6.98805
115	6	6.98805
120	8	9.31741
125	8	9.31741
130	8	9.31741
135	9	10.4821
140	9	10.4821
145	9	10.4821
150	9	10.4821
155	10	11.6468
160	10	11.6468
165	10	11.6468
170	10	11.6468
175	10	11.6468
180	11	12.8114
185	11	12.8114
190	11	12.8114
195	11	12.8114
200	11	12.8114
205	11	12.8114
210	12	13.9761
215	12	13.9761
220	12	13.9761
225	12	13.9761
230	12	13.9761
235	12	13.9761
240	13	15.1408
245	13	15.1408
250	13	15.1408
255	13	15.1408
260	13	15.1408
265	13	15.1408
270	14	16.3055
275	14	16.3055
280	14	16.3055
285	14	16.3055
290	14	16.3055
295	14	16.3055
300	14	16.3055

## Sheet: D5
					Temperature inside flux chamber, K	Volume of 1 mole of CO in standard conditions (0 deg C, 1 atm), L	Molecular weight of CO, g/mol	Emitting area enclosed by flux chamber (chamber footprint, A), m2	Volume of flux chamber (V), m3	dC/dt (slope)
					293	22.4	28	0.23	0.071	0.03
Time (t), s	Measured concentration of CO, ppm	(C) measured CO concentration adjusted to standard conditions (0 deg C, 1 atm), mg/m3
0	0	0
5	2	2.32935
10	2	2.32935
15	2	2.32935
20	2	2.32935
25	2	2.32935
30	2	2.32935
35	2	2.32935
40	2	2.32935
45	2	2.32935
50	2	2.32935
55	2	2.32935
60	2	2.32935
65	2	2.32935
70	3	3.49403
75	3	3.49403
80	3	3.49403
85	3	3.49403			Q=(V/A)*(dC/dt)			where: Q - CO flux, mg/m2/s
90	3	3.49403						V - flux chamber volume, m3
95	3	3.49403						A - flux chamber footprint, m2
100	3	3.49403			Q=	0.00926087	mg CO/m2/s	dC/dt - rate of change of CO concentration in the flux chamber with time (from the chart), mg/m3/s
105	3	3.49403				33.3391	mg CO/m2/h
110	4	4.6587
115	4	4.6587
120	4	4.6587
125	4	4.6587
130	4	4.6587
135	4	4.6587
140	4	4.6587
145	5	5.82338
150	5	5.82338
155	5	5.82338
160	5	5.82338
165	5	5.82338
170	5	5.82338
175	6	6.98805
180	6	6.98805
185	6	6.98805
190	6	6.98805
195	6	6.98805
200	6	6.98805
205	6	6.98805
210	6	6.98805
215	7	8.15273
220	7	8.15273
225	7	8.15273
230	7	8.15273
235	7	8.15273
240	8	9.31741
245	8	9.31741
250	8	9.31741
255	8	9.31741
260	8	9.31741
265	8	9.31741
270	8	9.31741
275	8	9.31741
280	8	9.31741
285	8	9.31741
290	8	9.31741
295	8	9.31741
300	8	9.31741

## Sheet: D6
					Temperature inside flux chamber, K	Volume of 1 mole of CO in standard conditions (0 deg C, 1 atm), L	Molecular weight of CO, g/mol	Emitting area enclosed by flux chamber (chamber footprint, A), m2	Volume of flux chamber (V), m3	dC/dt (slope)
					293	22.4	28	0.23	0.071	0.0608
Time (t), s	Measured concentration of CO, ppm	(C) measured CO concentration adjusted to standard conditions (0 deg C, 1 atm), mg/m3
0	0	0
5	1	1.16468
10	1	1.16468
15	1	1.16468
20	1	1.16468
25	1	1.16468
30	2	2.32935
35	2	2.32935
40	2	2.32935
45	2	2.32935
50	2	2.32935
55	3	3.49403
60	3	3.49403
65	3	3.49403
70	3	3.49403
75	3	3.49403
80	4	4.6587
85	4	4.6587			Q=(V/A)*(dC/dt)			where: Q - CO flux, mg/m2/s
90	4	4.6587						V - flux chamber volume, m3
95	4	4.6587						A - flux chamber footprint, m2
100	4	4.6587			Q=	0.0187687	mg CO/m2/s	dC/dt - rate of change of CO concentration in the flux chamber with time (from the chart), mg/m3/s
105	5	5.82338				67.5673	mg CO/m2/h
110	5	5.82338
115	5	5.82338
120	7	8.15273
125	7	8.15273
130	8	9.31741
135	8	9.31741
140	8	9.31741
145	9	10.4821
150	9	10.4821
155	9	10.4821
160	9	10.4821
165	11	12.8114
170	11	12.8114
175	11	12.8114
180	10	11.6468
185	10	11.6468
190	10	11.6468
195	11	12.8114
200	11	12.8114
205	11	12.8114
210	11	12.8114
215	11	12.8114
220	11	12.8114
225	13	15.1408
230	13	15.1408
235	13	15.1408
240	13	15.1408
245	13	15.1408
250	13	15.1408
255	14	16.3055
260	14	16.3055
265	14	16.3055
270	14	16.3055
275	14	16.3055
280	14	16.3055
285	14	16.3055
290	14	16.3055
295	14	16.3055
300	14	16.3055

## Sheet: D7
					Temperature inside flux chamber, K	Volume of 1 mole of CO in standard conditions (0 deg C, 1 atm), L	Molecular weight of CO, g/mol	Emitting area enclosed by flux chamber (chamber footprint, A), m2	Volume of flux chamber (V), m3	dC/dt (slope)
					293	22.4	28	0.23	0.071	0.0337
Time (t), s	Measured concentration of CO, ppm	(C) measured CO concentration adjusted to standard conditions (0 deg C, 1 atm), mg/m3
0	0	0
5	1	1.16468
10	1	1.16468
15	1	1.16468
20	1	1.16468
25	1	1.16468
30	1	1.16468
35	1	1.16468
40	2	2.32935
45	2	2.32935
50	2	2.32935
55	2	2.32935
60	4	4.6587
65	4	4.6587
70	4	4.6587
75	4	4.6587
80	4	4.6587
85	4	4.6587			Q=(V/A)*(dC/dt)			where: Q - CO flux, mg/m2/s
90	4	4.6587						V - flux chamber volume, m3
95	4	4.6587						A - flux chamber footprint, m2
100	4	4.6587			Q=	0.010403	mg CO/m2/s	dC/dt - rate of change of CO concentration in the flux chamber with time (from the chart), mg/m3/s
105	4	4.6587				37.451	mg CO/m2/h
110	4	4.6587
115	5	5.82338
120	5	5.82338
125	5	5.82338
130	5	5.82338
135	5	5.82338
140	5	5.82338
145	5	5.82338
150	5	5.82338
155	6	6.98805
160	6	6.98805
165	6	6.98805
170	6	6.98805
175	6	6.98805
180	6	6.98805
185	6	6.98805
190	6	6.98805
195	6	6.98805
200	6	6.98805
205	7	8.15273
210	7	8.15273
215	7	8.15273
220	7	8.15273
225	7	8.15273
230	7	8.15273
235	7	8.15273
240	8	9.31741
245	8	9.31741
250	8	9.31741
255	8	9.31741
260	8	9.31741
265	8	9.31741
270	8	9.31741
275	8	9.31741
280	10	11.6468
285	10	11.6468
290	10	11.6468
295	10	11.6468
300	10	11.6468

## Sheet: D8
					Temperature inside flux chamber, K	Volume of 1 mole of CO in standard conditions (0 deg C, 1 atm), L	Molecular weight of CO, g/mol	Emitting area enclosed by flux chamber (chamber footprint, A), m2	Volume of flux chamber (V), m3	dC/dt (slope)
					293	22.4	28	0.23	0.071	0.0343
Time (t), s	Measured concentration of CO, ppm	(C) measured CO concentration adjusted to standard conditions (0 deg C, 1 atm), mg/m3
0	0	0
5	2	2.32935
10	2	2.32935
15	2	2.32935
20	2	2.32935
25	3	3.49403
30	3	3.49403
35	3	3.49403
40	3	3.49403
45	3	3.49403
50	3	3.49403
55	4	4.6587
60	4	4.6587
65	4	4.6587
70	4	4.6587
75	4	4.6587
80	5	5.82338
85	5	5.82338			Q=(V/A)*(dC/dt)			where: Q - CO flux, mg/m2/s
90	5	5.82338						V - flux chamber volume, m3
95	5	5.82338						A - flux chamber footprint, m2
100	5	5.82338			Q=	0.0105883	mg CO/m2/s	dC/dt - rate of change of CO concentration in the flux chamber with time (from the chart), mg/m3/s
105	5	5.82338				38.1177	mg CO/m2/h
110	6	6.98805
115	6	6.98805
120	6	6.98805
125	6	6.98805
130	7	8.15273
135	7	8.15273
140	7	8.15273
145	7	8.15273
150	8	9.31741
155	8	9.31741
160	8	9.31741
165	9	10.4821
170	9	10.4821
175	9	10.4821
180	9	10.4821
185	8	9.31741
190	8	9.31741
195	8	9.31741
200	8	9.31741
205	8	9.31741
210	8	9.31741
215	8	9.31741
220	9	10.4821
225	9	10.4821
230	9	10.4821
235	9	10.4821
240	9	10.4821
245	9	10.4821
250	9	10.4821
255	9	10.4821
260	9	10.4821
265	10	11.6468
270	10	11.6468
275	10	11.6468
280	10	11.6468
285	10	11.6468
290	10	11.6468
295	10	11.6468
300	10	11.6468

## Sheet: D9
					Temperature inside flux chamber, K	Volume of 1 mole of CO in standard conditions (0 deg C, 1 atm), L	Molecular weight of CO, g/mol	Emitting area enclosed by flux chamber (chamber footprint, A), m2	Volume of flux chamber (V), m3	dC/dt (slope)
					293	22.4	28	0.23	0.071	0.0283
Time (t), s	Measured concentration of CO, ppm	(C) measured CO concentration adjusted to standard conditions (0 deg C, 1 atm), mg/m3
0	0	0
5	2	2.32935
10	2	2.32935
15	2	2.32935
20	3	3.49403
25	3	3.49403
30	3	3.49403
35	3	3.49403
40	3	3.49403
45	3	3.49403
50	3	3.49403
55	4	4.6587
60	4	4.6587
65	4	4.6587
70	4	4.6587
75	4	4.6587
80	4	4.6587
85	4	4.6587			Q=(V/A)*(dC/dt)			where: Q - CO flux, mg/m2/s
90	4	4.6587						V - flux chamber volume, m3
95	4	4.6587						A - flux chamber footprint, m2
100	4	4.6587			Q=	0.00873609	mg CO/m2/s	dC/dt - rate of change of CO concentration in the flux chamber with time (from the chart), mg/m3/s
105	6	6.98805				31.4499	mg CO/m2/h
110	6	6.98805
115	6	6.98805
120	6	6.98805
125	6	6.98805
130	6	6.98805
135	6	6.98805
140	6	6.98805
145	6	6.98805
150	6	6.98805
155	6	6.98805
160	6	6.98805
165	6	6.98805
170	7	8.15273
175	7	8.15273
180	7	8.15273
185	7	8.15273
190	7	8.15273
195	7	8.15273
200	7	8.15273
205	7	8.15273
210	7	8.15273
215	7	8.15273
220	7	8.15273
225	7	8.15273
230	7	8.15273
235	7	8.15273
240	8	9.31741
245	8	9.31741
250	8	9.31741
255	8	9.31741
260	9	10.4821
265	9	10.4821
270	9	10.4821
275	9	10.4821
280	9	10.4821
285	9	10.4821
290	9	10.4821
295	9	10.4821
300	9	10.4821

## Sheet: Modelling
Modelling of CO emission				Notes
Surface of the pile (Ap)		300	m2
Time (t)		3600	s	Accumulation of CO in airtight hall during time (t)
Headspace volume in the hall		1000	m3	Assumption: the hall is airtight
Number of piles in the hall (n)		4	-
Emitted CO mass in time (t)		62618.3	mg	Estimated as a product of (averaged flux at D1-D9 locations), Ap, t, and n
		62.6183	g	Conversion from mg to g
Concentration of accumulated CO in the hall headspace during 1 hour, estimated for the 'after' turning scenario		62.6183	mg/m3
Molecular weight of CO		28	g/mol
Air temperature in the hall		20	deg C
Ambient pressure		1	atm
Volume of 1 mole of CO in standard conditions (0 deg C, 1 atm)		22.4	L
Concentration of accumulated CO in the hall headspace during 1 hour, estimated for the 'after' turning scenario		72.93	ppm
Concentration of accumulated CO in the hall headspace during 1 hour, estimated for the 'after' turning scenario		0.007293	%
