# Supplementary material for: Assessment of Emissions and Potential Occupational Exposure to Carbon Monoxide during Biowaste Composting
Source: Preprints.org preprint supplement (doi:10.20944/preprints202306.1586.v1), 2023-06-22
Supplement: Supplementary file 8 [file Pile 1.2 before turning.xlsx]

## Sheet: D1
					Temperature inside flux chamber, K	Volume of 1 mole of CO in standard conditions (0 deg C, 1 atm), L	Molecular weight of CO, g/mol	Emitting area enclosed by flux chamber (chamber footprint, A), m2	Volume of flux chamber (V), m3	dC/dt (slope)
					293	22.4	28	0.23	0.071	0.03
Time (t), s	Measured concentration of CO, ppm	(C) measured CO concentration adjusted to standard conditions (0 deg C, 1 atm), mg/m3
0	0	0
5	0	0
10	0	0
15	0	0
20	0	0
25	1	1.16468
30	1	1.16468
35	1	1.16468
40	1	1.16468
45	1	1.16468
50	1	1.16468
55	1	1.16468
60	1	1.16468
65	2	2.32935
70	2	2.32935
75	2	2.32935
80	2	2.32935
85	2	2.32935			Q=(V/A)*(dC/dt)			where: Q - CO flux, mg/m2/s
90	2	2.32935						V - flux chamber volume, m3
95	2	2.32935						A - flux chamber footprint, m2
100	2	2.32935			Q=	0.00926087	mg CO/m2/s	dC/dt - rate of change of CO concentration in the flux chamber with time (from the chart), mg/m3/s
105	2	2.32935				33.3391	mg CO/m2/h
110	2	2.32935
115	2	2.32935
120	2	2.32935
125	2	2.32935
130	3	3.49403
135	3	3.49403
140	3	3.49403
145	3	3.49403
150	3	3.49403
155	3	3.49403
160	3	3.49403
165	3	3.49403
170	3	3.49403
175	3	3.49403
180	3	3.49403
185	3	3.49403
190	5	5.82338
195	5	5.82338
200	5	5.82338
205	5	5.82338
210	5	5.82338
215	5	5.82338
220	5	5.82338
225	5	5.82338
230	6	6.98805
235	6	6.98805
240	6	6.98805
245	8	9.31741
250	7	8.15273
255	7	8.15273
260	7	8.15273
265	7	8.15273
270	7	8.15273
275	7	8.15273
280	7	8.15273
285	7	8.15273
290	7	8.15273
295	7	8.15273
300	7	8.15273

## Sheet: D2
					Temperature inside flux chamber, K	Volume of 1 mole of CO in standard conditions (0 deg C, 1 atm), L	Molecular weight of CO, g/mol	Emitting area enclosed by flux chamber (chamber footprint, A), m2	Volume of flux chamber (V), m3	dC/dt (slope)
					293	22.4	28	0.23	0.071	0.0111
Time (t), s	Measured concentration of CO, ppm	(C) measured CO concentration adjusted to standard conditions (0 deg C, 1 atm), mg/m3
0	0	0
5	0	0
10	0	0
15	0	0
20	0	0
25	0	0
30	0	0
35	2	2.32935
40	2	2.32935
45	2	2.32935
50	2	2.32935
55	2	2.32935
60	2	2.32935
65	2	2.32935
70	2	2.32935
75	2	2.32935
80	2	2.32935
85	2	2.32935			Q=(V/A)*(dC/dt)			where: Q - CO flux, mg/m2/s
90	2	2.32935						V - flux chamber volume, m3
95	3	3.49403						A - flux chamber footprint, m2
100	3	3.49403			Q=	0.00342652	mg CO/m2/s	dC/dt - rate of change of CO concentration in the flux chamber with time (from the chart), mg/m3/s
105	3	3.49403				12.3355	mg CO/m2/h
110	3	3.49403
115	3	3.49403
120	3	3.49403
125	3	3.49403
130	3	3.49403
135	3	3.49403
140	3	3.49403
145	3	3.49403
150	1	1.16468
155	1	1.16468
160	1	1.16468
165	1	1.16468
170	1	1.16468
175	1	1.16468
180	1	1.16468
185	1	1.16468
190	1	1.16468
195	1	1.16468
200	1	1.16468
205	3	3.49403
210	3	3.49403
215	3	3.49403
220	3	3.49403
225	3	3.49403
230	3	3.49403
235	3	3.49403
240	3	3.49403
245	3	3.49403
250	3	3.49403
255	3	3.49403
260	4	4.6587
265	4	4.6587
270	4	4.6587
275	4	4.6587
280	4	4.6587
285	4	4.6587
290	4	4.6587
295	4	4.6587
300	4	4.6587

## Sheet: D3
					Temperature inside flux chamber, K	Volume of 1 mole of CO in standard conditions (0 deg C, 1 atm), L	Molecular weight of CO, g/mol	Emitting area enclosed by flux chamber (chamber footprint, A), m2	Volume of flux chamber (V), m3	dC/dt (slope)
					293	22.4	28	0.23	0.071	0.0257
Time (t), s	Measured concentration of CO, ppm	(C) measured CO concentration adjusted to standard conditions (0 deg C, 1 atm), mg/m3
0	0	0
5	1	1.16468
10	1	1.16468
15	1	1.16468
20	2	2.32935
25	2	2.32935
30	2	2.32935
35	2	2.32935
40	2	2.32935
45	2	2.32935
50	3	3.49403
55	3	3.49403
60	3	3.49403
65	3	3.49403
70	3	3.49403
75	4	4.6587
80	4	4.6587
85	4	4.6587			Q=(V/A)*(dC/dt)			where: Q - CO flux, mg/m2/s
90	4	4.6587						V - flux chamber volume, m3
95	4	4.6587						A - flux chamber footprint, m2
100	4	4.6587			Q=	0.00793348	mg CO/m2/s	dC/dt - rate of change of CO concentration in the flux chamber with time (from the chart), mg/m3/s
105	4	4.6587				28.5605	mg CO/m2/h
110	5	5.82338
115	5	5.82338
120	5	5.82338
125	5	5.82338
130	4	4.6587
135	4	4.6587
140	4	4.6587
145	4	4.6587
150	4	4.6587
155	4	4.6587
160	4	4.6587
165	4	4.6587
170	5	5.82338
175	5	5.82338
180	5	5.82338
185	5	5.82338
190	5	5.82338
195	5	5.82338
200	5	5.82338
205	6	6.98805
210	6	6.98805
215	6	6.98805
220	6	6.98805
225	6	6.98805
230	6	6.98805
235	6	6.98805
240	7	8.15273
245	7	8.15273
250	7	8.15273
255	7	8.15273
260	7	8.15273
265	7	8.15273
270	8	9.31741
275	8	9.31741
280	8	9.31741
285	8	9.31741
290	8	9.31741
295	8	9.31741
300	8	9.31741

## Sheet: D4
					Temperature inside flux chamber, K	Volume of 1 mole of CO in standard conditions (0 deg C, 1 atm), L	Molecular weight of CO, g/mol	Emitting area enclosed by flux chamber (chamber footprint, A), m2	Volume of flux chamber (V), m3	dC/dt (slope)
					293	22.4	28	0.23	0.071	0.0186
Time (t), s	Measured concentration of CO, ppm	(C) measured CO concentration adjusted to standard conditions (0 deg C, 1 atm), mg/m3
0	0	0
5	0	0
10	0	0
15	0	0
20	0	0
25	0	0
30	0	0
35	0	0
40	0	0
45	0	0
50	0	0
55	0	0
60	0	0
65	0	0
70	0	0
75	0	0
80	0	0
85	0	0			Q=(V/A)*(dC/dt)			where: Q - CO flux, mg/m2/s
90	0	0						V - flux chamber volume, m3
95	0	0						A - flux chamber footprint, m2
100	1	1.16468			Q=	0.00574174	mg CO/m2/s	dC/dt - rate of change of CO concentration in the flux chamber with time (from the chart), mg/m3/s
105	1	1.16468				20.6703	mg CO/m2/h
110	1	1.16468
115	1	1.16468
120	1	1.16468
125	1	1.16468
130	1	1.16468
135	1	1.16468
140	1	1.16468
145	1	1.16468
150	2	2.32935
155	2	2.32935
160	2	2.32935
165	2	2.32935
170	2	2.32935
175	2	2.32935
180	2	2.32935
185	2	2.32935
190	2	2.32935
195	2	2.32935
200	3	3.49403
205	3	3.49403
210	3	3.49403
215	3	3.49403
220	3	3.49403
225	3	3.49403
230	3	3.49403
235	3	3.49403
240	3	3.49403
245	3	3.49403
250	3	3.49403
255	3	3.49403
260	3	3.49403
265	4	4.6587
270	4	4.6587
275	4	4.6587
280	4	4.6587
285	4	4.6587
290	4	4.6587
295	4	4.6587
300	4	4.6587

## Sheet: D5
					Temperature inside flux chamber, K	Volume of 1 mole of CO in standard conditions (0 deg C, 1 atm), L	Molecular weight of CO, g/mol	Emitting area enclosed by flux chamber (chamber footprint, A), m2	Volume of flux chamber (V), m3	dC/dt (slope)
					293	22.4	28	0.23	0.071	0.0236
Time (t), s	Measured concentration of CO, ppm	(C) measured CO concentration adjusted to standard conditions (0 deg C, 1 atm), mg/m3
0	0	0
5	0	0
10	0	0
15	0	0
20	0	0
25	0	0
30	0	0
35	0	0
40	0	0
45	0	0
50	0	0
55	1	1.16468
60	1	1.16468
65	1	1.16468
70	1	1.16468
75	1	1.16468
80	1	1.16468
85	1	1.16468			Q=(V/A)*(dC/dt)			where: Q - CO flux, mg/m2/s
90	1	1.16468						V - flux chamber volume, m3
95	1	1.16468						A - flux chamber footprint, m2
100	1	1.16468			Q=	0.00728522	mg CO/m2/s	dC/dt - rate of change of CO concentration in the flux chamber with time (from the chart), mg/m3/s
105	2	2.32935				26.2268	mg CO/m2/h
110	2	2.32935
115	2	2.32935
120	2	2.32935
125	2	2.32935
130	2	2.32935
135	2	2.32935
140	2	2.32935
145	2	2.32935
150	2	2.32935
155	3	3.49403
160	3	3.49403
165	3	3.49403
170	3	3.49403
175	3	3.49403
180	3	3.49403
185	3	3.49403
190	3	3.49403
195	4	4.6587
200	4	4.6587
205	4	4.6587
210	4	4.6587
215	4	4.6587
220	4	4.6587
225	4	4.6587
230	4	4.6587
235	5	5.82338
240	5	5.82338
245	5	5.82338
250	5	5.82338
255	5	5.82338
260	5	5.82338
265	5	5.82338
270	5	5.82338
275	5	5.82338
280	5	5.82338
285	5	5.82338
290	5	5.82338
295	5	5.82338
300	5	5.82338

## Sheet: D6
					Temperature inside flux chamber, K	Volume of 1 mole of CO in standard conditions (0 deg C, 1 atm), L	Molecular weight of CO, g/mol	Emitting area enclosed by flux chamber (chamber footprint, A), m2	Volume of flux chamber (V), m3	dC/dt (slope)
					293	22.4	28	0.23	0.071	0.0138
Time (t), s	Measured concentration of CO, ppm	(C) measured CO concentration adjusted to standard conditions (0 deg C, 1 atm), mg/m3
0	0	0
5	0	0
10	0	0
15	0	0
20	0	0
25	0	0
30	0	0
35	0	0
40	0	0
45	0	0
50	0	0
55	0	0
60	0	0
65	0	0
70	0	0
75	0	0
80	0	0
85	1	1.16468			Q=(V/A)*(dC/dt)			where: Q - CO flux, mg/m2/s
90	1	1.16468						V - flux chamber volume, m3
95	1	1.16468						A - flux chamber footprint, m2
100	1	1.16468			Q=	0.00426	mg CO/m2/s	dC/dt - rate of change of CO concentration in the flux chamber with time (from the chart), mg/m3/s
105	1	1.16468				15.336	mg CO/m2/h
110	1	1.16468
115	1	1.16468
120	1	1.16468
125	1	1.16468
130	1	1.16468
135	1	1.16468
140	1	1.16468
145	1	1.16468
150	1	1.16468
155	1	1.16468
160	1	1.16468
165	1	1.16468
170	1	1.16468
175	1	1.16468
180	2	2.32935
185	2	2.32935
190	2	2.32935
195	2	2.32935
200	2	2.32935
205	2	2.32935
210	2	2.32935
215	2	2.32935
220	2	2.32935
225	2	2.32935
230	2	2.32935
235	2	2.32935
240	2	2.32935
245	3	3.49403
250	3	3.49403
255	3	3.49403
260	3	3.49403
265	3	3.49403
270	3	3.49403
275	3	3.49403
280	3	3.49403
285	3	3.49403
290	3	3.49403
295	3	3.49403
300	3	3.49403

## Sheet: D7
					Temperature inside flux chamber, K	Volume of 1 mole of CO in standard conditions (0 deg C, 1 atm), L	Molecular weight of CO, g/mol	Emitting area enclosed by flux chamber (chamber footprint, A), m2	Volume of flux chamber (V), m3	dC/dt (slope)
					293	22.4	28	0.23	0.071	0.0173
Time (t), s	Measured concentration of CO, ppm	(C) measured CO concentration adjusted to standard conditions (0 deg C, 1 atm), mg/m3
0	0	0
5	0	0
10	0	0
15	0	0
20	0	0
25	0	0
30	0	0
35	0	0
40	0	0
45	0	0
50	0	0
55	0	0
60	0	0
65	0	0
70	0	0
75	0	0
80	0	0
85	0	0			Q=(V/A)*(dC/dt)			where: Q - CO flux, mg/m2/s
90	0	0						V - flux chamber volume, m3
95	0	0						A - flux chamber footprint, m2
100	0	0			Q=	0.00534043	mg CO/m2/s	dC/dt - rate of change of CO concentration in the flux chamber with time (from the chart), mg/m3/s
105	0	0				19.2256	mg CO/m2/h
110	0	0
115	0	0
120	0	0
125	0	0
130	0	0
135	0	0
140	0	0
145	1	1.16468
150	1	1.16468
155	1	1.16468
160	1	1.16468
165	1	1.16468
170	1	1.16468
175	1	1.16468
180	2	2.32935
185	2	2.32935
190	2	2.32935
195	2	2.32935
200	2	2.32935
205	2	2.32935
210	2	2.32935
215	2	2.32935
220	2	2.32935
225	2	2.32935
230	2	2.32935
235	3	3.49403
240	3	3.49403
245	3	3.49403
250	3	3.49403
255	3	3.49403
260	3	3.49403
265	3	3.49403
270	3	3.49403
275	4	4.6587
280	4	4.6587
285	4	4.6587
290	4	4.6587
295	4	4.6587
300	4	4.6587

## Sheet: D8
					Temperature inside flux chamber, K	Volume of 1 mole of CO in standard conditions (0 deg C, 1 atm), L	Molecular weight of CO, g/mol	Emitting area enclosed by flux chamber (chamber footprint, A), m2	Volume of flux chamber (V), m3	dC/dt (slope)
					293	22.4	28	0.23	0.071	0.0144
Time (t), s	Measured concentration of CO, ppm	(C) measured CO concentration adjusted to standard conditions (0 deg C, 1 atm), mg/m3
0	0	0
5	0	0
10	0	0
15	0	0
20	0	0
25	0	0
30	0	0
35	0	0
40	0	0
45	0	0
50	0	0
55	0	0
60	0	0
65	0	0
70	0	0
75	0	0
80	0	0
85	0	0			Q=(V/A)*(dC/dt)			where: Q - CO flux, mg/m2/s
90	0	0						V - flux chamber volume, m3
95	0	0						A - flux chamber footprint, m2
100	0	0			Q=	0.00444522	mg CO/m2/s	dC/dt - rate of change of CO concentration in the flux chamber with time (from the chart), mg/m3/s
105	0	0				16.0028	mg CO/m2/h
110	0	0
115	1	1.16468
120	1	1.16468
125	1	1.16468
130	1	1.16468
135	1	1.16468
140	1	1.16468
145	1	1.16468
150	1	1.16468
155	1	1.16468
160	1	1.16468
165	1	1.16468
170	1	1.16468
175	2	2.32935
180	2	2.32935
185	2	2.32935
190	2	2.32935
195	2	2.32935
200	2	2.32935
205	2	2.32935
210	2	2.32935
215	2	2.32935
220	2	2.32935
225	2	2.32935
230	2	2.32935
235	2	2.32935
240	2	2.32935
245	2	2.32935
250	3	3.49403
255	3	3.49403
260	3	3.49403
265	3	3.49403
270	3	3.49403
275	3	3.49403
280	3	3.49403
285	3	3.49403
290	3	3.49403
295	3	3.49403
300	3	3.49403

## Sheet: D9
					Temperature inside flux chamber, K	Volume of 1 mole of CO in standard conditions (0 deg C, 1 atm), L	Molecular weight of CO, g/mol	Emitting area enclosed by flux chamber (chamber footprint, A), m2	Volume of flux chamber (V), m3	dC/dt (slope)
					293	22.4	28	0.23	0.071	0.0171
Time (t), s	Measured concentration of CO, ppm	(C) measured CO concentration adjusted to standard conditions (0 deg C, 1 atm), mg/m3
0	0	0
5	0	0
10	0	0
15	0	0
20	0	0
25	0	0
30	0	0
35	0	0
40	0	0
45	0	0
50	1	1.16468
55	1	1.16468
60	1	1.16468
65	1	1.16468
70	1	1.16468
75	1	1.16468
80	1	1.16468
85	1	1.16468			Q=(V/A)*(dC/dt)			where: Q - CO flux, mg/m2/s
90	1	1.16468						V - flux chamber volume, m3
95	1	1.16468						A - flux chamber footprint, m2
100	1	1.16468			Q=	0.0052787	mg CO/m2/s	dC/dt - rate of change of CO concentration in the flux chamber with time (from the chart), mg/m3/s
105	1	1.16468				19.0033	mg CO/m2/h
110	1	1.16468
115	1	1.16468
120	1	1.16468
125	1	1.16468
130	2	2.32935
135	2	2.32935
140	2	2.32935
145	2	2.32935
150	2	2.32935
155	2	2.32935
160	2	2.32935
165	2	2.32935
170	2	2.32935
175	2	2.32935
180	2	2.32935
185	2	2.32935
190	2	2.32935
195	2	2.32935
200	3	3.49403
205	3	3.49403
210	3	3.49403
215	3	3.49403
220	3	3.49403
225	3	3.49403
230	3	3.49403
235	3	3.49403
240	3	3.49403
245	3	3.49403
250	3	3.49403
255	4	4.6587
260	4	4.6587
265	4	4.6587
270	4	4.6587
275	4	4.6587
280	4	4.6587
285	4	4.6587
290	4	4.6587
295	4	4.6587
300	4	4.6587

## Sheet: Modelling
Modelling of CO emission				Notes
Surface of the pile (Ap)		300	m2
Time (t)		3600	s	Accumulation of CO in airtight hall during time (t)
Headspace volume in the hall		1000	m3	Assumption: the hall is airtight
Number of piles in the hall (n)		4	-
Emitted CO mass in time (t)		25426.6	mg	Estimated as a product of (averaged flux at D1-D9 locations), Ap, t, and n
		25.4266	g	Conversion from mg to g
Concentration of accumulated CO in the hall headspace during 1 hour, estimated for the 'before' turning scenario		25.4266	mg/m3
Molecular weight of CO		28	g/mol
Air temperature in the hall		20	deg C
Ambient pressure		1	atm
Volume of 1 mole of CO in standard conditions (0 deg C, 1 atm)		22.4	L
Concentration of accumulated CO in the hall headspace during 1 hour, estimated for the 'before' turning scenario		29.6138	ppm
Concentration of accumulated CO in the hall headspace during 1 hour, estimated for the 'before' turning scenario		0.00296138	%
