# Supplementary material for: Assessment of Emissions and Potential Occupational Exposure to Carbon Monoxide during Biowaste Composting
Source: Preprints.org preprint supplement (doi:10.20944/preprints202306.1586.v1), 2023-06-22
Supplement: Supplementary file 10 [file Pile 2.1 after turning.xlsx]

## Sheet: D1
					Temperature inside flux chamber, K	Volume of 1 mole of CO in standard conditions (0 deg C, 1 atm), L	Molecular weight of CO, g/mol	Emitting area enclosed by flux chamber (chamber footprint, A), m2	Volume of flux chamber (V), m3	dC/dt (slope)
					293	22.4	28	0.23	0.071	0.1282
Time (t), s	Measured concentration of CO, ppm	(C) measured CO concentration adjusted to standard conditions (0 deg C, 1 atm), mg/m3
0	0	0
5	5	5.82338
10	6	6.98805
15	8	9.31741
20	10	11.6468
25	11	12.8114
30	12	13.9761
35	15	17.4701
40	15	17.4701
45	15	17.4701
50	16	18.6348
55	16	18.6348
60	20	23.2935
65	21	24.4582
70	23	26.7875
75	22	25.6229
80	23	26.7875
85	24	27.9522			Q=(V/A)*(dC/dt)			where: Q - CO flux, mg/m2/s
90	24	27.9522						V - flux chamber volume, m3
95	26	30.2816						A - flux chamber footprint, m2
100	26	30.2816			Q=	0.0395748	mg CO/m2/s	dC/dt - rate of change of CO concentration in the flux chamber with time (from the chart), mg/m3/s
105	26	30.2816				142.469	mg CO/m2/h
110	26	30.2816
115	27	31.4462
120	27	31.4462
125	28	32.6109
130	28	32.6109
135	30	34.9403
140	30	34.9403
145	30	34.9403
150	32	37.2696
155	32	37.2696
160	33	38.4343
165	33	38.4343
170	33	38.4343
175	33	38.4343
180	33	38.4343
185	33	38.4343
190	33	38.4343
195	34	39.599
200	34	39.599
205	35	40.7637
210	35	40.7637
215	36	41.9283
220	35	40.7637
225	35	40.7637
230	37	43.093
235	38	44.2577
240	39	45.4224
245	39	45.4224
250	39	45.4224
255	38	44.2577
260	38	44.2577
265	37	43.093
270	35	40.7637
275	39	45.4224
280	40	46.587
285	40	46.587
290	40	46.587
295	40	46.587
300	40	46.587

## Sheet: D2
					Temperature inside flux chamber, K	Volume of 1 mole of CO in standard conditions (0 deg C, 1 atm), L	Molecular weight of CO, g/mol	Emitting area enclosed by flux chamber (chamber footprint, A), m2	Volume of flux chamber (V), m3	dC/dt (slope)
					293	22.4	28	0.23	0.071	0.3152
Time (t), s	Measured concentration of CO, ppm	(C) measured CO concentration adjusted to standard conditions (0 deg C, 1 atm), mg/m3
0	0	0
5	3	3.49403
10	3	3.49403
15	5	5.82338
20	6	6.98805
25	7	8.15273
30	10	11.6468
35	11	12.8114
40	11	12.8114
45	13	15.1408
50	15	17.4701
55	17	19.7995
60	15	17.4701
65	15	17.4701
70	17	19.7995
75	18	20.9642
80	20	23.2935
85	24	27.9522			Q=(V/A)*(dC/dt)			where: Q - CO flux, mg/m2/s
90	28	32.6109						V - flux chamber volume, m3
95	30	34.9403						A - flux chamber footprint, m2
100	33	38.4343			Q=	0.0973009	mg CO/m2/s	dC/dt - rate of change of CO concentration in the flux chamber with time (from the chart), mg/m3/s
105	35	40.7637				350.283	mg CO/m2/h
110	36	41.9283
115	40	46.587
120	42	48.9164
125	45	52.4104
130	48	55.9044
135	50	58.2338
140	52	60.5631
145	52	60.5631
150	52	60.5631
155	55	64.0572
160	56	65.2218
165	57	66.3865
170	57	66.3865
175	58	67.5512
180	58	67.5512
185	60	69.8805
190	63	73.3746
195	65	75.7039
200	65	75.7039
205	65	75.7039
210	67	78.0333
215	68	79.198
220	68	79.198
225	69	80.3626
230	70	81.5273
235	70	81.5273
240	70	81.5273
245	70	81.5273
250	70	81.5273
255	72	83.8567
260	72	83.8567
265	74	86.186
270	73	85.0213
275	72	83.8567
280	72	83.8567
285	71	82.692
290	71	82.692
295	71	82.692
300	71	82.692

## Sheet: D3
					Temperature inside flux chamber, K	Volume of 1 mole of CO in standard conditions (0 deg C, 1 atm), L	Molecular weight of CO, g/mol	Emitting area enclosed by flux chamber (chamber footprint, A), m2	Volume of flux chamber (V), m3	dC/dt (slope)
					293	22.4	28	0.23	0.071	0.1695
Time (t), s	Measured concentration of CO, ppm	(C) measured CO concentration adjusted to standard conditions (0 deg C, 1 atm), mg/m3
0	0	0
5	4	4.6587
10	4	4.6587
15	6	6.98805
20	6	6.98805
25	6	6.98805
30	6	6.98805
35	6	6.98805
40	9	10.4821
45	9	10.4821
50	9	10.4821
55	9	10.4821
60	11	12.8114
65	11	12.8114
70	11	12.8114
75	11	12.8114
80	15	17.4701
85	17	19.7995			Q=(V/A)*(dC/dt)			where: Q - CO flux, mg/m2/s
90	20	23.2935						V - flux chamber volume, m3
95	23	26.7875						A - flux chamber footprint, m2
100	24	27.9522			Q=	0.0523239	mg CO/m2/s	dC/dt - rate of change of CO concentration in the flux chamber with time (from the chart), mg/m3/s
105	26	30.2816				188.366	mg CO/m2/h
110	26	30.2816
115	26	30.2816
120	30	34.9403
125	33	38.4343
130	33	38.4343
135	33	38.4343
140	35	40.7637
145	35	40.7637
150	37	43.093
155	37	43.093
160	37	43.093
165	35	40.7637
170	35	40.7637
175	36	41.9283
180	36	41.9283
185	36	41.9283
190	38	44.2577
195	38	44.2577
200	39	45.4224
205	40	46.587
210	37	43.093
215	37	43.093
220	38	44.2577
225	38	44.2577
230	38	44.2577
235	39	45.4224
240	39	45.4224
245	39	45.4224
250	39	45.4224
255	40	46.587
260	42	48.9164
265	42	48.9164
270	42	48.9164
275	42	48.9164
280	42	48.9164
285	42	48.9164
290	42	48.9164
295	42	48.9164
300	42	48.9164

## Sheet: D4
					Temperature inside flux chamber, K	Volume of 1 mole of CO in standard conditions (0 deg C, 1 atm), L	Molecular weight of CO, g/mol	Emitting area enclosed by flux chamber (chamber footprint, A), m2	Volume of flux chamber (V), m3	dC/dt (slope)
					293	22.4	28	0.23	0.071	-0.0016
Time (t), s	Measured concentration of CO, ppm	(C) measured CO concentration adjusted to standard conditions (0 deg C, 1 atm), mg/m3
0	0	0
5	1	1.16468
10	1	1.16468
15	1	1.16468
20	0	0
25	0	0
30	0	0
35	0	0
40	0	0
45	0	0
50	0	0
55	0	0
60	0	0
65	1	1.16468
70	1	1.16468
75	1	1.16468
80	1	1.16468
85	1	1.16468			Q=(V/A)*(dC/dt)			where: Q - CO flux, mg/m2/s
90	1	1.16468						V - flux chamber volume, m3
95	1	1.16468						A - flux chamber footprint, m2
100	1	1.16468			Q=	-0.000493913	mg CO/m2/s	dC/dt - rate of change of CO concentration in the flux chamber with time (from the chart), mg/m3/s
105	1	1.16468				-1.77809	mg CO/m2/h
110	1	1.16468
115	1	1.16468
120	1	1.16468
125	1	1.16468
130	1	1.16468
135	1	1.16468
140	0	0
145	0	0
150	0	0
155	0	0
160	0	0
165	1	1.16468
170	1	1.16468
175	2	2.32935
180	2	2.32935
185	2	2.32935
190	2	2.32935
195	1	1.16468
200	1	1.16468
205	1	1.16468
210	1	1.16468
215	0	0
220	0	0
225	0	0
230	0	0
235	0	0
240	0	0
245	0	0
250	0	0
255	0	0
260	0	0
265	0	0
270	0	0
275	0	0
280	0	0
285	0	0
290	0	0
295	0	0
300	0	0

## Sheet: D5
					Temperature inside flux chamber, K	Volume of 1 mole of CO in standard conditions (0 deg C, 1 atm), L	Molecular weight of CO, g/mol	Emitting area enclosed by flux chamber (chamber footprint, A), m2	Volume of flux chamber (V), m3	dC/dt (slope)
					293	22.4	28	0.23	0.071	0.0778
Time (t), s	Measured concentration of CO, ppm	(C) measured CO concentration adjusted to standard conditions (0 deg C, 1 atm), mg/m3
0	0	0
5	1	1.16468
10	1	1.16468
15	2	2.32935
20	3	3.49403
25	3	3.49403
30	4	4.6587
35	5	5.82338
40	5	5.82338
45	5	5.82338
50	7	8.15273
55	7	8.15273
60	7	8.15273
65	7	8.15273
70	8	9.31741
75	8	9.31741
80	9	10.4821
85	10	11.6468			Q=(V/A)*(dC/dt)			where: Q - CO flux, mg/m2/s
90	10	11.6468						V - flux chamber volume, m3
95	11	12.8114						A - flux chamber footprint, m2
100	11	12.8114			Q=	0.0240165	mg CO/m2/s	dC/dt - rate of change of CO concentration in the flux chamber with time (from the chart), mg/m3/s
105	13	15.1408				86.4595	mg CO/m2/h
110	13	15.1408
115	14	16.3055
120	14	16.3055
125	15	17.4701
130	15	17.4701
135	15	17.4701
140	15	17.4701
145	15	17.4701
150	17	19.7995
155	17	19.7995
160	16	18.6348
165	16	18.6348
170	16	18.6348
175	16	18.6348
180	16	18.6348
185	16	18.6348
190	17	19.7995
195	17	19.7995
200	17	19.7995
205	17	19.7995
210	17	19.7995
215	17	19.7995
220	18	20.9642
225	18	20.9642
230	18	20.9642
235	18	20.9642
240	18	20.9642
245	20	23.2935
250	20	23.2935
255	20	23.2935
260	20	23.2935
265	20	23.2935
270	20	23.2935
275	21	24.4582
280	21	24.4582
285	21	24.4582
290	21	24.4582
295	21	24.4582
300	21	24.4582

## Sheet: D6
					Temperature inside flux chamber, K	Volume of 1 mole of CO in standard conditions (0 deg C, 1 atm), L	Molecular weight of CO, g/mol	Emitting area enclosed by flux chamber (chamber footprint, A), m2	Volume of flux chamber (V), m3	dC/dt (slope)
					293	22.4	28	0.23	0.071	0.0027
Time (t), s	Measured concentration of CO, ppm	(C) measured CO concentration adjusted to standard conditions (0 deg C, 1 atm), mg/m3
0	0	0
5	0	0
10	0	0
15	0	0
20	0	0
25	0	0
30	0	0
35	0	0
40	0	0
45	0	0
50	0	0
55	0	0
60	0	0
65	0	0
70	0	0
75	0	0
80	0	0
85	0	0			Q=(V/A)*(dC/dt)			where: Q - CO flux, mg/m2/s
90	0	0						V - flux chamber volume, m3
95	0	0						A - flux chamber footprint, m2
100	0	0			Q=	0.000833478	mg CO/m2/s	dC/dt - rate of change of CO concentration in the flux chamber with time (from the chart), mg/m3/s
105	0	0				3.00052	mg CO/m2/h
110	0	0
115	0	0
120	0	0
125	1	1.16468
130	1	1.16468
135	1	1.16468
140	1	1.16468
145	1	1.16468
150	1	1.16468
155	1	1.16468
160	1	1.16468
165	1	1.16468
170	1	1.16468
175	1	1.16468
180	1	1.16468
185	1	1.16468
190	1	1.16468
195	1	1.16468
200	1	1.16468
205	1	1.16468
210	1	1.16468
215	1	1.16468
220	1	1.16468
225	1	1.16468
230	1	1.16468
235	1	1.16468
240	1	1.16468
245	1	1.16468
250	1	1.16468
255	1	1.16468
260	0	0
265	0	0
270	0	0
275	0	0
280	0	0
285	0	0
290	0	0
295	0	0
300	0	0

## Sheet: D7
					Temperature inside flux chamber, K	Volume of 1 mole of CO in standard conditions (0 deg C, 1 atm), L	Molecular weight of CO, g/mol	Emitting area enclosed by flux chamber (chamber footprint, A), m2	Volume of flux chamber (V), m3	dC/dt (slope)
					293	22.4	28	0.23	0.071	-0.0034
Time (t), s	Measured concentration of CO, ppm	(C) measured CO concentration adjusted to standard conditions (0 deg C, 1 atm), mg/m3
0	0	0
5	0	0
10	0	0
15	0	0
20	0	0
25	0	0
30	0	0
35	1	1.16468
40	1	1.16468
45	1	1.16468
50	1	1.16468
55	1	1.16468
60	2	2.32935
65	2	2.32935
70	2	2.32935
75	2	2.32935
80	2	2.32935
85	2	2.32935			Q=(V/A)*(dC/dt)			where: Q - CO flux, mg/m2/s
90	2	2.32935						V - flux chamber volume, m3
95	2	2.32935						A - flux chamber footprint, m2
100	2	2.32935			Q=	-0.00104957	mg CO/m2/s	dC/dt - rate of change of CO concentration in the flux chamber with time (from the chart), mg/m3/s
105	2	2.32935				-3.77843	mg CO/m2/h
110	2	2.32935
115	2	2.32935
120	2	2.32935
125	2	2.32935
130	2	2.32935
135	1	1.16468
140	1	1.16468
145	1	1.16468
150	1	1.16468
155	1	1.16468
160	1	1.16468
165	1	1.16468
170	1	1.16468
175	1	1.16468
180	1	1.16468
185	1	1.16468
190	1	1.16468
195	1	1.16468
200	2	2.32935
205	2	2.32935
210	2	2.32935
215	2	2.32935
220	1	1.16468
225	1	1.16468
230	0	0
235	0	0
240	0	0
245	0	0
250	0	0
255	0	0
260	0	0
265	0	0
270	0	0
275	0	0
280	0	0
285	0	0
290	0	0
295	0	0
300	0	0

## Sheet: D8
					Temperature inside flux chamber, K	Volume of 1 mole of CO in standard conditions (0 deg C, 1 atm), L	Molecular weight of CO, g/mol	Emitting area enclosed by flux chamber (chamber footprint, A), m2	Volume of flux chamber (V), m3	dC/dt (slope)
					293	22.4	28	0.23	0.071	0.0009
Time (t), s	Measured concentration of CO, ppm	(C) measured CO concentration adjusted to standard conditions (0 deg C, 1 atm), mg/m3
0	0	0
5	0	0
10	0	0
15	0	0
20	0	0
25	0	0
30	0	0
35	0	0
40	0	0
45	0	0
50	0	0
55	0	0
60	0	0
65	0	0
70	0	0
75	0	0
80	0	0
85	0	0			Q=(V/A)*(dC/dt)			where: Q - CO flux, mg/m2/s
90	0	0						V - flux chamber volume, m3
95	0	0						A - flux chamber footprint, m2
100	0	0			Q=	0.000277826	mg CO/m2/s	dC/dt - rate of change of CO concentration in the flux chamber with time (from the chart), mg/m3/s
105	0	0				1.00017	mg CO/m2/h
110	0	0
115	0	0
120	0	0
125	0	0
130	0	0
135	0	0
140	0	0
145	1	1.16468
150	1	1.16468
155	1	1.16468
160	1	1.16468
165	1	1.16468
170	1	1.16468
175	1	1.16468
180	1	1.16468
185	1	1.16468
190	1	1.16468
195	1	1.16468
200	1	1.16468
205	1	1.16468
210	1	1.16468
215	0	0
220	0	0
225	0	0
230	0	0
235	0	0
240	0	0
245	0	0
250	0	0
255	0	0
260	0	0
265	0	0
270	0	0
275	0	0
280	0	0
285	0	0
290	0	0
295	0	0
300	0	0

## Sheet: D9
					Temperature inside flux chamber, K	Volume of 1 mole of CO in standard conditions (0 deg C, 1 atm), L	Molecular weight of CO, g/mol	Emitting area enclosed by flux chamber (chamber footprint, A), m2	Volume of flux chamber (V), m3	dC/dt (slope)
					293	22.4	28	0.23	0.071	-0.0018
Time (t), s	Measured concentration of CO, ppm	(C) measured CO concentration adjusted to standard conditions (0 deg C, 1 atm), mg/m3
0	0	0
5	0	0
10	0	0
15	0	0
20	0	0
25	0	0
30	0	0
35	1	1.16468
40	1	1.16468
45	1	1.16468
50	1	1.16468
55	1	1.16468
60	1	1.16468
65	1	1.16468
70	1	1.16468
75	1	1.16468
80	1	1.16468
85	1	1.16468			Q=(V/A)*(dC/dt)			where: Q - CO flux, mg/m2/s
90	1	1.16468						V - flux chamber volume, m3
95	1	1.16468						A - flux chamber footprint, m2
100	1	1.16468			Q=	-0.000555652	mg CO/m2/s	dC/dt - rate of change of CO concentration in the flux chamber with time (from the chart), mg/m3/s
105	1	1.16468				-2.00035	mg CO/m2/h
110	1	1.16468
115	1	1.16468
120	1	1.16468
125	1	1.16468
130	0	0
135	0	0
140	0	0
145	0	0
150	0	0
155	0	0
160	0	0
165	0	0
170	0	0
175	0	0
180	0	0
185	0	0
190	0	0
195	1	1.16468
200	1	1.16468
205	1	1.16468
210	1	1.16468
215	1	1.16468
220	1	1.16468
225	1	1.16468
230	1	1.16468
235	1	1.16468
240	0	0
245	0	0
250	0	0
255	0	0
260	0	0
265	0	0
270	0	0
275	0	0
280	0	0
285	0	0
290	0	0
295	0	0
300	0	0

## Sheet: Modelling
Modelling of CO emission				Notes
Surface of the pile (Ap)		300	m2
Time (t)		3600	s	Accumulation of CO in airtight hall during time (t)
Headspace volume in the hall		1000	m3	Assumption: the hall is airtight
Number of piles in the hall (n)		4	-
Emitted CO mass in time (t)		101870	mg	Estimated as a product of (averaged flux at D1-D9 locations), Ap, t, and n
		101.87	g	Conversion from mg to g
Concentration of accumulated CO in the hall headspace during 1 hour, estimated for the 'after' turning scenario		101.87	mg/m3
Molecular weight of CO		28	g/mol
Air temperature in the hall		20	deg C
Ambient pressure		1	atm
Volume of 1 mole of CO in standard conditions (0 deg C, 1 atm)		22.4	L
Concentration of accumulated CO in the hall headspace during 1 hour, estimated for the 'after' turning scenario		118.645	ppm
Concentration of accumulated CO in the hall headspace during 1 hour, estimated for the 'after' turning scenario		0.0118645	%
