# Supplementary material for: Assessment of Emissions and Potential Occupational Exposure to Carbon Monoxide during Biowaste Composting
Source: Preprints.org preprint supplement (doi:10.20944/preprints202306.1586.v1), 2023-06-22
Supplement: Supplementary file 12 [file Pile 2.1 before turning.xlsx]

## Sheet: D1
					Temperature inside flux chamber, K	Volume of 1 mole of CO in standard conditions (0 deg C, 1 atm), L	Molecular weight of CO, g/mol	Emitting area enclosed by flux chamber (chamber footprint, A), m2	Volume of flux chamber (V), m3	dC/dt (slope)
					293	22.4	28	0.23	0.071	0.0089
Time (t), s	Measured concentration of CO, ppm	(C) measured CO concentration adjusted to standard conditions (0 deg C, 1 atm), mg/m3
0	0	0
5	0	0
10	0	0
15	0	0
20	0	0
25	0	0
30	0	0
35	0	0
40	0	0
45	0	0
50	0	0
55	0	0
60	0	0
65	0	0
70	1	1.16468
75	1	1.16468
80	1	1.16468
85	1	1.16468			Q=(V/A)*(dC/dt)			where: Q - CO flux, mg/m2/s
90	1	1.16468						V - flux chamber volume, m3
95	1	1.16468						A - flux chamber footprint, m2
100	0	0			Q=	0.00274739	mg CO/m2/s	dC/dt - rate of change of CO concentration in the flux chamber with time (from the chart), mg/m3/s
105	0	0				9.89061	mg CO/m2/h
110	0	0
115	0	0
120	0	0
125	1	1.16468
130	1	1.16468
135	1	1.16468
140	1	1.16468
145	1	1.16468
150	1	1.16468
155	1	1.16468
160	1	1.16468
165	1	1.16468
170	1	1.16468
175	1	1.16468
180	1	1.16468
185	1	1.16468
190	1	1.16468
195	2	2.32935
200	2	2.32935
205	2	2.32935
210	2	2.32935
215	2	2.32935
220	2	2.32935
225	2	2.32935
230	2	2.32935
235	1	1.16468
240	1	1.16468
245	1	1.16468
250	1	1.16468
255	2	2.32935
260	2	2.32935
265	2	2.32935
270	2	2.32935
275	2	2.32935
280	2	2.32935
285	2	2.32935
290	2	2.32935
295	2	2.32935
300	2	2.32935

## Sheet: D2
					Temperature inside flux chamber, K	Volume of 1 mole of CO in standard conditions (0 deg C, 1 atm), L	Molecular weight of CO, g/mol	Emitting area enclosed by flux chamber (chamber footprint, A), m2	Volume of flux chamber (V), m3	dC/dt (slope)
					293	22.4	28	0.23	0.071	0.0186
Time (t), s	Measured concentration of CO, ppm	(C) measured CO concentration adjusted to standard conditions (0 deg C, 1 atm), mg/m3
0	0	0
5	0	0
10	0	0
15	0	0
20	0	0
25	0	0
30	0	0
35	0	0
40	0	0
45	0	0
50	0	0
55	0	0
60	0	0
65	0	0
70	1	1.16468
75	1	1.16468
80	1	1.16468
85	1	1.16468			Q=(V/A)*(dC/dt)			where: Q - CO flux, mg/m2/s
90	1	1.16468						V - flux chamber volume, m3
95	1	1.16468						A - flux chamber footprint, m2
100	1	1.16468			Q=	0.00574174	mg CO/m2/s	dC/dt - rate of change of CO concentration in the flux chamber with time (from the chart), mg/m3/s
105	1	1.16468				20.6703	mg CO/m2/h
110	1	1.16468
115	1	1.16468
120	2	2.32935
125	2	2.32935
130	2	2.32935
135	2	2.32935
140	2	2.32935
145	2	2.32935
150	3	3.49403
155	3	3.49403
160	3	3.49403
165	3	3.49403
170	3	3.49403
175	4	4.6587
180	5	5.82338
185	4	4.6587
190	4	4.6587
195	4	4.6587
200	3	3.49403
205	3	3.49403
210	3	3.49403
215	3	3.49403
220	3	3.49403
225	3	3.49403
230	3	3.49403
235	3	3.49403
240	3	3.49403
245	3	3.49403
250	3	3.49403
255	3	3.49403
260	4	4.6587
265	4	4.6587
270	4	4.6587
275	4	4.6587
280	4	4.6587
285	4	4.6587
290	4	4.6587
295	4	4.6587
300	4	4.6587

## Sheet: D3
					Temperature inside flux chamber, K	Volume of 1 mole of CO in standard conditions (0 deg C, 1 atm), L	Molecular weight of CO, g/mol	Emitting area enclosed by flux chamber (chamber footprint, A), m2	Volume of flux chamber (V), m3	dC/dt (slope)
					293	22.4	28	0.23	0.071	0.0099
Time (t), s	Measured concentration of CO, ppm	(C) measured CO concentration adjusted to standard conditions (0 deg C, 1 atm), mg/m3
0	0	0
5	0	0
10	0	0
15	0	0
20	0	0
25	0	0
30	0	0
35	0	0
40	0	0
45	2	2.32935
50	2	2.32935
55	2	2.32935
60	2	2.32935
65	2	2.32935
70	2	2.32935
75	2	2.32935
80	2	2.32935
85	2	2.32935			Q=(V/A)*(dC/dt)			where: Q - CO flux, mg/m2/s
90	2	2.32935						V - flux chamber volume, m3
95	2	2.32935						A - flux chamber footprint, m2
100	2	2.32935			Q=	0.00305609	mg CO/m2/s	dC/dt - rate of change of CO concentration in the flux chamber with time (from the chart), mg/m3/s
105	3	3.49403				11.0019	mg CO/m2/h
110	3	3.49403
115	2	2.32935
120	2	2.32935
125	2	2.32935
130	3	3.49403
135	3	3.49403
140	3	3.49403
145	3	3.49403
150	3	3.49403
155	3	3.49403
160	3	3.49403
165	4	4.6587
170	4	4.6587
175	4	4.6587
180	4	4.6587
185	4	4.6587
190	4	4.6587
195	3	3.49403
200	3	3.49403
205	3	3.49403
210	3	3.49403
215	3	3.49403
220	3	3.49403
225	3	3.49403
230	2	2.32935
235	2	2.32935
240	2	2.32935
245	2	2.32935
250	2	2.32935
255	2	2.32935
260	2	2.32935
265	3	3.49403
270	3	3.49403
275	3	3.49403
280	3	3.49403
285	3	3.49403
290	3	3.49403
295	3	3.49403
300	3	3.49403

## Sheet: D4
					Temperature inside flux chamber, K	Volume of 1 mole of CO in standard conditions (0 deg C, 1 atm), L	Molecular weight of CO, g/mol	Emitting area enclosed by flux chamber (chamber footprint, A), m2	Volume of flux chamber (V), m3	dC/dt (slope)
					293	22.4	28	0.23	0.071	0.0086
Time (t), s	Measured concentration of CO, ppm	(C) measured CO concentration adjusted to standard conditions (0 deg C, 1 atm), mg/m3
0	0	0
5	0	0
10	0	0
15	0	0
20	0	0
25	0	0
30	0	0
35	0	0
40	0	0
45	0	0
50	0	0
55	0	0
60	0	0
65	0	0
70	0	0
75	1	1.16468
80	1	1.16468
85	1	1.16468			Q=(V/A)*(dC/dt)			where: Q - CO flux, mg/m2/s
90	1	1.16468						V - flux chamber volume, m3
95	1	1.16468						A - flux chamber footprint, m2
100	1	1.16468			Q=	0.00265478	mg CO/m2/s	dC/dt - rate of change of CO concentration in the flux chamber with time (from the chart), mg/m3/s
105	0	0				9.55722	mg CO/m2/h
110	0	0
115	0	0
120	0	0
125	0	0
130	0	0
135	1	1.16468
140	1	1.16468
145	1	1.16468
150	1	1.16468
155	1	1.16468
160	1	1.16468
165	1	1.16468
170	1	1.16468
175	1	1.16468
180	1	1.16468
185	1	1.16468
190	2	2.32935
195	2	2.32935
200	2	2.32935
205	2	2.32935
210	2	2.32935
215	2	2.32935
220	2	2.32935
225	1	1.16468
230	1	1.16468
235	1	1.16468
240	1	1.16468
245	1	1.16468
250	1	1.16468
255	1	1.16468
260	2	2.32935
265	2	2.32935
270	2	2.32935
275	2	2.32935
280	2	2.32935
285	2	2.32935
290	2	2.32935
295	2	2.32935
300	2	2.32935

## Sheet: D5
					Temperature inside flux chamber, K	Volume of 1 mole of CO in standard conditions (0 deg C, 1 atm), L	Molecular weight of CO, g/mol	Emitting area enclosed by flux chamber (chamber footprint, A), m2	Volume of flux chamber (V), m3	dC/dt (slope)
					293	22.4	28	0.23	0.071	0.0334
Time (t), s	Measured concentration of CO, ppm	(C) measured CO concentration adjusted to standard conditions (0 deg C, 1 atm), mg/m3
0	0	0
5	1	1.16468
10	1	1.16468
15	1	1.16468
20	1	1.16468
25	1	1.16468
30	1	1.16468
35	1	1.16468
40	1	1.16468
45	1	1.16468
50	2	2.32935
55	2	2.32935
60	2	2.32935
65	2	2.32935
70	2	2.32935
75	3	3.49403
80	3	3.49403
85	3	3.49403			Q=(V/A)*(dC/dt)			where: Q - CO flux, mg/m2/s
90	3	3.49403						V - flux chamber volume, m3
95	3	3.49403						A - flux chamber footprint, m2
100	4	4.6587			Q=	0.0103104	mg CO/m2/s	dC/dt - rate of change of CO concentration in the flux chamber with time (from the chart), mg/m3/s
105	4	4.6587				37.1176	mg CO/m2/h
110	4	4.6587
115	4	4.6587
120	4	4.6587
125	4	4.6587
130	4	4.6587
135	4	4.6587
140	5	5.82338
145	5	5.82338
150	5	5.82338
155	5	5.82338
160	7	8.15273
165	7	8.15273
170	7	8.15273
175	8	9.31741
180	8	9.31741
185	8	9.31741
190	8	9.31741
195	8	9.31741
200	8	9.31741
205	7	8.15273
210	7	8.15273
215	7	8.15273
220	7	8.15273
225	7	8.15273
230	7	8.15273
235	7	8.15273
240	7	8.15273
245	7	8.15273
250	7	8.15273
255	7	8.15273
260	8	9.31741
265	8	9.31741
270	8	9.31741
275	8	9.31741
280	8	9.31741
285	8	9.31741
290	8	9.31741
295	8	9.31741
300	8	9.31741

## Sheet: D6
					Temperature inside flux chamber, K	Volume of 1 mole of CO in standard conditions (0 deg C, 1 atm), L	Molecular weight of CO, g/mol	Emitting area enclosed by flux chamber (chamber footprint, A), m2	Volume of flux chamber (V), m3	dC/dt (slope)
					293	22.4	28	0.23	0.071	0.0061
Time (t), s	Measured concentration of CO, ppm	(C) measured CO concentration adjusted to standard conditions (0 deg C, 1 atm), mg/m3
0	0	0
5	0	0
10	0	0
15	0	0
20	1	1.16468
25	1	1.16468
30	1	1.16468
35	1	1.16468
40	2	2.32935
45	2	2.32935
50	2	2.32935
55	2	2.32935
60	2	2.32935
65	2	2.32935
70	2	2.32935
75	2	2.32935
80	4	4.6587
85	4	4.6587			Q=(V/A)*(dC/dt)			where: Q - CO flux, mg/m2/s
90	4	4.6587						V - flux chamber volume, m3
95	4	4.6587						A - flux chamber footprint, m2
100	4	4.6587			Q=	0.00188304	mg CO/m2/s	dC/dt - rate of change of CO concentration in the flux chamber with time (from the chart), mg/m3/s
105	4	4.6587				6.77896	mg CO/m2/h
110	4	4.6587
115	4	4.6587
120	4	4.6587
125	4	4.6587
130	4	4.6587
135	4	4.6587
140	3	3.49403
145	3	3.49403
150	3	3.49403
155	3	3.49403
160	3	3.49403
165	3	3.49403
170	3	3.49403
175	3	3.49403
180	3	3.49403
185	3	3.49403
190	3	3.49403
195	3	3.49403
200	2	2.32935
205	2	2.32935
210	2	2.32935
215	2	2.32935
220	2	2.32935
225	2	2.32935
230	2	2.32935
235	3	3.49403
240	3	3.49403
245	3	3.49403
250	3	3.49403
255	3	3.49403
260	3	3.49403
265	3	3.49403
270	3	3.49403
275	3	3.49403
280	3	3.49403
285	3	3.49403
290	3	3.49403
295	3	3.49403
300	3	3.49403

## Sheet: D7
					Temperature inside flux chamber, K	Volume of 1 mole of CO in standard conditions (0 deg C, 1 atm), L	Molecular weight of CO, g/mol	Emitting area enclosed by flux chamber (chamber footprint, A), m2	Volume of flux chamber (V), m3	dC/dt (slope)
					293	22.4	28	0.23	0.071	0.0003
Time (t), s	Measured concentration of CO, ppm	(C) measured CO concentration adjusted to standard conditions (0 deg C, 1 atm), mg/m3
0	0	0
5	0	0
10	0	0
15	0	0
20	0	0
25	0	0
30	0	0
35	0	0
40	0	0
45	0	0
50	0	0
55	0	0
60	0	0
65	0	0
70	0	0
75	0	0
80	0	0
85	0	0			Q=(V/A)*(dC/dt)			where: Q - CO flux, mg/m2/s
90	0	0						V - flux chamber volume, m3
95	0	0						A - flux chamber footprint, m2
100	0	0			Q=	9.26087e-05	mg CO/m2/s	dC/dt - rate of change of CO concentration in the flux chamber with time (from the chart), mg/m3/s
105	0	0				0.333391	mg CO/m2/h
110	0	0
115	0	0
120	0	0
125	1	1.16468
130	1	1.16468
135	1	1.16468
140	1	1.16468
145	1	1.16468
150	1	1.16468
155	1	1.16468
160	1	1.16468
165	1	1.16468
170	1	1.16468
175	1	1.16468
180	1	1.16468
185	1	1.16468
190	1	1.16468
195	0	0
200	0	0
205	0	0
210	0	0
215	0	0
220	0	0
225	0	0
230	0	0
235	0	0
240	0	0
245	0	0
250	0	0
255	0	0
260	0	0
265	0	0
270	0	0
275	0	0
280	0	0
285	0	0
290	0	0
295	0	0
300	0	0

## Sheet: D8
					Temperature inside flux chamber, K	Volume of 1 mole of CO in standard conditions (0 deg C, 1 atm), L	Molecular weight of CO, g/mol	Emitting area enclosed by flux chamber (chamber footprint, A), m2	Volume of flux chamber (V), m3	dC/dt (slope)
					293	22.4	28	0.23	0.071	0.0057
Time (t), s	Measured concentration of CO, ppm	(C) measured CO concentration adjusted to standard conditions (0 deg C, 1 atm), mg/m3
0	0	0
5	0	0
10	0	0
15	0	0
20	0	0
25	0	0
30	0	0
35	0	0
40	0	0
45	0	0
50	0	0
55	0	0
60	0	0
65	0	0
70	0	0
75	0	0
80	0	0
85	0	0			Q=(V/A)*(dC/dt)			where: Q - CO flux, mg/m2/s
90	0	0						V - flux chamber volume, m3
95	0	0						A - flux chamber footprint, m2
100	1	1.16468			Q=	0.00175957	mg CO/m2/s	dC/dt - rate of change of CO concentration in the flux chamber with time (from the chart), mg/m3/s
105	1	1.16468				6.33443	mg CO/m2/h
110	1	1.16468
115	1	1.16468
120	1	1.16468
125	1	1.16468
130	1	1.16468
135	1	1.16468
140	1	1.16468
145	1	1.16468
150	1	1.16468
155	1	1.16468
160	1	1.16468
165	1	1.16468
170	1	1.16468
175	1	1.16468
180	2	2.32935
185	2	2.32935
190	2	2.32935
195	2	2.32935
200	2	2.32935
205	2	2.32935
210	2	2.32935
215	2	2.32935
220	2	2.32935
225	2	2.32935
230	2	2.32935
235	2	2.32935
240	2	2.32935
245	2	2.32935
250	2	2.32935
255	2	2.32935
260	1	1.16468
265	1	1.16468
270	1	1.16468
275	0	0
280	0	0
285	0	0
290	0	0
295	0	0
300	0	0

## Sheet: D9
					Temperature inside flux chamber, K	Volume of 1 mole of CO in standard conditions (0 deg C, 1 atm), L	Molecular weight of CO, g/mol	Emitting area enclosed by flux chamber (chamber footprint, A), m2	Volume of flux chamber (V), m3	dC/dt (slope)
					293	22.4	28	0.23	0.071	0.0001
Time (t), s	Measured concentration of CO, ppm	(C) measured CO concentration adjusted to standard conditions (0 deg C, 1 atm), mg/m3
0	0	0
5	0	0
10	0	0
15	0	0
20	0	0
25	0	0
30	0	0
35	0	0
40	0	0
45	0	0
50	0	0
55	1	1.16468
60	1	1.16468
65	1	1.16468
70	1	1.16468
75	1	1.16468
80	1	1.16468
85	1	1.16468			Q=(V/A)*(dC/dt)			where: Q - CO flux, mg/m2/s
90	1	1.16468						V - flux chamber volume, m3
95	1	1.16468						A - flux chamber footprint, m2
100	1	1.16468			Q=	3.08696e-05	mg CO/m2/s	dC/dt - rate of change of CO concentration in the flux chamber with time (from the chart), mg/m3/s
105	1	1.16468				0.11113	mg CO/m2/h
110	1	1.16468
115	1	1.16468
120	1	1.16468
125	1	1.16468
130	1	1.16468
135	1	1.16468
140	1	1.16468
145	0	0
150	0	0
155	0	0
160	0	0
165	0	0
170	0	0
175	0	0
180	0	0
185	0	0
190	0	0
195	1	1.16468
200	1	1.16468
205	1	1.16468
210	1	1.16468
215	1	1.16468
220	1	1.16468
225	1	1.16468
230	1	1.16468
235	1	1.16468
240	1	1.16468
245	1	1.16468
250	1	1.16468
255	1	1.16468
260	0	0
265	0	0
270	0	0
275	0	0
280	0	0
285	0	0
290	0	0
295	0	0
300	0	0

## Sheet: Modelling
Modelling of CO emission				Notes
Surface of the pile (Ap)		300	m2
Time (t)		3600	s	Accumulation of CO in airtight hall during time (t)
Headspace volume in the hall		1000	m3	Assumption: the hall is airtight
Number of piles in the hall (n)		4	-
Emitted CO mass in time (t)		13572.7	mg	Estimated as a product of (averaged flux at D1-D9 locations), Ap, t, and n
		13.5727	g	Conversion from mg to g
Concentration of accumulated CO in the hall headspace during 1 hour, estimated for the 'before' turning scenario		13.5727	mg/m3
Molecular weight of CO		28	g/mol
Air temperature in the hall		20	deg C
Ambient pressure		1	atm
Volume of 1 mole of CO in standard conditions (0 deg C, 1 atm)		22.4	L
Concentration of accumulated CO in the hall headspace during 1 hour, estimated for the 'before' turning scenario		15.8078	ppm
Concentration of accumulated CO in the hall headspace during 1 hour, estimated for the 'before' turning scenario		0.00158078	%
