# Supplementary material for: Assessment of Emissions and Potential Occupational Exposure to Carbon Monoxide during Biowaste Composting
Source: Preprints.org preprint supplement (doi:10.20944/preprints202306.1586.v1), 2023-06-22
Supplement: Supplementary file 14 [file Pile 2.2 after turning.xlsx]

## Sheet: D1
					Temperature inside flux chamber, K	Volume of 1 mole of CO in standard conditions (0 deg C, 1 atm), L	Molecular weight of CO, g/mol	Emitting area enclosed by flux chamber (chamber footprint, A), m2	Volume of flux chamber (V), m3	dC/dt (slope)
					293	22.4	28	0.23	0.071	0.0161
Time (t), s	Measured concentration of CO, ppm	(C) measured CO concentration adjusted to standard conditions (0 deg C, 1 atm), mg/m3
0	0	0
5	0	0
10	0	0
15	0	0
20	1	1.16468
25	1	1.16468
30	1	1.16468
35	1	1.16468
40	1	1.16468
45	1	1.16468
50	1	1.16468
55	1	1.16468
60	0	0
65	0	0
70	0	0
75	0	0
80	0	0
85	0	0			Q=(V/A)*(dC/dt)			where: Q - CO flux, mg/m2/s
90	0	0						V - flux chamber volume, m3
95	0	0						A - flux chamber footprint, m2
100	0	0			Q=	0.00497	mg CO/m2/s	dC/dt - rate of change of CO concentration in the flux chamber with time (from the chart), mg/m3/s
105	1	1.16468				17.892	mg CO/m2/h
110	1	1.16468
115	1	1.16468
120	1	1.16468
125	1	1.16468
130	1	1.16468
135	1	1.16468
140	2	2.32935
145	2	2.32935
150	2	2.32935
155	2	2.32935
160	2	2.32935
165	2	2.32935
170	2	2.32935
175	2	2.32935
180	2	2.32935
185	2	2.32935
190	2	2.32935
195	2	2.32935
200	2	2.32935
205	2	2.32935
210	2	2.32935
215	2	2.32935
220	3	3.49403
225	3	3.49403
230	3	3.49403
235	3	3.49403
240	3	3.49403
245	3	3.49403
250	3	3.49403
255	3	3.49403
260	4	4.6587
265	4	4.6587
270	4	4.6587
275	4	4.6587
280	4	4.6587
285	4	4.6587
290	4	4.6587
295	4	4.6587
300	4	4.6587

## Sheet: D2
					Temperature inside flux chamber, K	Volume of 1 mole of CO in standard conditions (0 deg C, 1 atm), L	Molecular weight of CO, g/mol	Emitting area enclosed by flux chamber (chamber footprint, A), m2	Volume of flux chamber (V), m3	dC/dt (slope)
					293	22.4	28	0.23	0.071	0.0815
Time (t), s	Measured concentration of CO, ppm	(C) measured CO concentration adjusted to standard conditions (0 deg C, 1 atm), mg/m3
0	0	0
5	3	3.49403
10	3	3.49403
15	3	3.49403
20	3	3.49403
25	3	3.49403
30	2	2.32935
35	2	2.32935
40	3	3.49403
45	3	3.49403
50	3	3.49403
55	4	4.6587
60	4	4.6587
65	4	4.6587
70	4	4.6587
75	5	5.82338
80	5	5.82338
85	5	5.82338			Q=(V/A)*(dC/dt)			where: Q - CO flux, mg/m2/s
90	7	8.15273						V - flux chamber volume, m3
95	7	8.15273						A - flux chamber footprint, m2
100	8	9.31741			Q=	0.0251587	mg CO/m2/s	dC/dt - rate of change of CO concentration in the flux chamber with time (from the chart), mg/m3/s
105	8	9.31741				90.5713	mg CO/m2/h
110	10	11.6468
115	10	11.6468
120	10	11.6468
125	11	12.8114
130	11	12.8114
135	11	12.8114
140	12	13.9761
145	12	13.9761
150	12	13.9761
155	13	15.1408
160	13	15.1408
165	13	15.1408
170	14	16.3055
175	14	16.3055
180	14	16.3055
185	14	16.3055
190	15	17.4701
195	15	17.4701
200	15	17.4701
205	15	17.4701
210	15	17.4701
215	17	19.7995
220	17	19.7995
225	17	19.7995
230	17	19.7995
235	18	20.9642
240	18	20.9642
245	18	20.9642
250	18	20.9642
255	19	22.1288
260	19	22.1288
265	19	22.1288
270	20	23.2935
275	20	23.2935
280	20	23.2935
285	20	23.2935
290	20	23.2935
295	20	23.2935
300	20	23.2935

## Sheet: D3
					Temperature inside flux chamber, K	Volume of 1 mole of CO in standard conditions (0 deg C, 1 atm), L	Molecular weight of CO, g/mol	Emitting area enclosed by flux chamber (chamber footprint, A), m2	Volume of flux chamber (V), m3	dC/dt (slope)
					293	22.4	28	0.23	0.071	0.0242
Time (t), s	Measured concentration of CO, ppm	(C) measured CO concentration adjusted to standard conditions (0 deg C, 1 atm), mg/m3
0	0	0
5	0	0
10	0	0
15	0	0
20	0	0
25	0	0
30	0	0
35	0	0
40	0	0
45	0	0
50	0	0
55	1	1.16468
60	1	1.16468
65	1	1.16468
70	1	1.16468
75	1	1.16468
80	1	1.16468
85	2	2.32935			Q=(V/A)*(dC/dt)			where: Q - CO flux, mg/m2/s
90	2	2.32935						V - flux chamber volume, m3
95	2	2.32935						A - flux chamber footprint, m2
100	2	2.32935			Q=	0.00747043	mg CO/m2/s	dC/dt - rate of change of CO concentration in the flux chamber with time (from the chart), mg/m3/s
105	2	2.32935				26.8936	mg CO/m2/h
110	2	2.32935
115	3	3.49403
120	3	3.49403
125	3	3.49403
130	3	3.49403
135	3	3.49403
140	3	3.49403
145	3	3.49403
150	3	3.49403
155	4	4.6587
160	4	4.6587
165	4	4.6587
170	4	4.6587
175	3	3.49403
180	3	3.49403
185	3	3.49403
190	3	3.49403
195	3	3.49403
200	3	3.49403
205	4	4.6587
210	4	4.6587
215	4	4.6587
220	4	4.6587
225	4	4.6587
230	4	4.6587
235	4	4.6587
240	4	4.6587
245	5	5.82338
250	5	5.82338
255	5	5.82338
260	5	5.82338
265	5	5.82338
270	5	5.82338
275	6	6.98805
280	6	6.98805
285	6	6.98805
290	6	6.98805
295	6	6.98805
300	6	6.98805

## Sheet: D4
					Temperature inside flux chamber, K	Volume of 1 mole of CO in standard conditions (0 deg C, 1 atm), L	Molecular weight of CO, g/mol	Emitting area enclosed by flux chamber (chamber footprint, A), m2	Volume of flux chamber (V), m3	dC/dt (slope)
					293	22.4	28	0.23	0.071	0.0396
Time (t), s	Measured concentration of CO, ppm	(C) measured CO concentration adjusted to standard conditions (0 deg C, 1 atm), mg/m3
0	0	0
5	1	1.16468
10	1	1.16468
15	1	1.16468
20	1	1.16468
25	1	1.16468
30	1	1.16468
35	1	1.16468
40	2	2.32935
45	2	2.32935
50	2	2.32935
55	2	2.32935
60	2	2.32935
65	2	2.32935
70	2	2.32935
75	2	2.32935
80	2	2.32935
85	4	4.6587			Q=(V/A)*(dC/dt)			where: Q - CO flux, mg/m2/s
90	4	4.6587						V - flux chamber volume, m3
95	4	4.6587						A - flux chamber footprint, m2
100	4	4.6587			Q=	0.0122243	mg CO/m2/s	dC/dt - rate of change of CO concentration in the flux chamber with time (from the chart), mg/m3/s
105	4	4.6587				44.0077	mg CO/m2/h
110	4	4.6587
115	4	4.6587
120	4	4.6587
125	4	4.6587
130	5	5.82338
135	5	5.82338
140	5	5.82338
145	5	5.82338
150	6	6.98805
155	6	6.98805
160	6	6.98805
165	6	6.98805
170	6	6.98805
175	6	6.98805
180	6	6.98805
185	6	6.98805
190	7	8.15273
195	7	8.15273
200	7	8.15273
205	7	8.15273
210	7	8.15273
215	8	9.31741
220	8	9.31741
225	8	9.31741
230	8	9.31741
235	8	9.31741
240	8	9.31741
245	9	10.4821
250	9	10.4821
255	9	10.4821
260	9	10.4821
265	9	10.4821
270	10	11.6468
275	10	11.6468
280	10	11.6468
285	10	11.6468
290	10	11.6468
295	10	11.6468
300	10	11.6468

## Sheet: D5
					Temperature inside flux chamber, K	Volume of 1 mole of CO in standard conditions (0 deg C, 1 atm), L	Molecular weight of CO, g/mol	Emitting area enclosed by flux chamber (chamber footprint, A), m2	Volume of flux chamber (V), m3	dC/dt (slope)
					293	22.4	28	0.23	0.071	0.0141
Time (t), s	Measured concentration of CO, ppm	(C) measured CO concentration adjusted to standard conditions (0 deg C, 1 atm), mg/m3
0	0	0
5	1	1.16468
10	1	1.16468
15	1	1.16468
20	1	1.16468
25	1	1.16468
30	1	1.16468
35	1	1.16468
40	1	1.16468
45	1	1.16468
50	1	1.16468
55	1	1.16468
60	1	1.16468
65	1	1.16468
70	1	1.16468
75	1	1.16468
80	1	1.16468
85	1	1.16468			Q=(V/A)*(dC/dt)			where: Q - CO flux, mg/m2/s
90	1	1.16468						V - flux chamber volume, m3
95	1	1.16468						A - flux chamber footprint, m2
100	1	1.16468			Q=	0.00435261	mg CO/m2/s	dC/dt - rate of change of CO concentration in the flux chamber with time (from the chart), mg/m3/s
105	1	1.16468				15.6694	mg CO/m2/h
110	1	1.16468
115	1	1.16468
120	1	1.16468
125	2	2.32935
130	2	2.32935
135	2	2.32935
140	2	2.32935
145	1	1.16468
150	1	1.16468
155	2	2.32935
160	2	2.32935
165	2	2.32935
170	2	2.32935
175	2	2.32935
180	2	2.32935
185	2	2.32935
190	2	2.32935
195	2	2.32935
200	2	2.32935
205	3	3.49403
210	3	3.49403
215	3	3.49403
220	3	3.49403
225	3	3.49403
230	3	3.49403
235	3	3.49403
240	3	3.49403
245	3	3.49403
250	3	3.49403
255	4	4.6587
260	4	4.6587
265	4	4.6587
270	4	4.6587
275	4	4.6587
280	4	4.6587
285	4	4.6587
290	4	4.6587
295	4	4.6587
300	4	4.6587

## Sheet: D6
					Temperature inside flux chamber, K	Volume of 1 mole of CO in standard conditions (0 deg C, 1 atm), L	Molecular weight of CO, g/mol	Emitting area enclosed by flux chamber (chamber footprint, A), m2	Volume of flux chamber (V), m3	dC/dt (slope)
					293	22.4	28	0.23	0.071	0.0372
Time (t), s	Measured concentration of CO, ppm	(C) measured CO concentration adjusted to standard conditions (0 deg C, 1 atm), mg/m3
0	0	0
5	0	0
10	0	0
15	0	0
20	0	0
25	0	0
30	0	0
35	0	0
40	0	0
45	0	0
50	0	0
55	0	0
60	0	0
65	0	0
70	0	0
75	1	1.16468
80	1	1.16468
85	1	1.16468			Q=(V/A)*(dC/dt)			where: Q - CO flux, mg/m2/s
90	1	1.16468						V - flux chamber volume, m3
95	1	1.16468						A - flux chamber footprint, m2
100	2	2.32935			Q=	0.0114835	mg CO/m2/s	dC/dt - rate of change of CO concentration in the flux chamber with time (from the chart), mg/m3/s
105	2	2.32935				41.3405	mg CO/m2/h
110	2	2.32935
115	2	2.32935
120	3	3.49403
125	3	3.49403
130	3	3.49403
135	3	3.49403
140	3	3.49403
145	3	3.49403
150	4	4.6587
155	4	4.6587
160	4	4.6587
165	4	4.6587
170	5	5.82338
175	5	5.82338
180	5	5.82338
185	5	5.82338
190	5	5.82338
195	5	5.82338
200	6	6.98805
205	6	6.98805
210	6	6.98805
215	6	6.98805
220	6	6.98805
225	6	6.98805
230	6	6.98805
235	6	6.98805
240	7	8.15273
245	7	8.15273
250	7	8.15273
255	7	8.15273
260	7	8.15273
265	7	8.15273
270	7	8.15273
275	8	9.31741
280	8	9.31741
285	8	9.31741
290	8	9.31741
295	8	9.31741
300	8	9.31741

## Sheet: D7
					Temperature inside flux chamber, K	Volume of 1 mole of CO in standard conditions (0 deg C, 1 atm), L	Molecular weight of CO, g/mol	Emitting area enclosed by flux chamber (chamber footprint, A), m2	Volume of flux chamber (V), m3	dC/dt (slope)
					293	22.4	28	0.23	0.071	0.0114
Time (t), s	Measured concentration of CO, ppm	(C) measured CO concentration adjusted to standard conditions (0 deg C, 1 atm), mg/m3
0	0	0
5	0	0
10	0	0
15	0	0
20	0	0
25	0	0
30	0	0
35	1	1.16468
40	1	1.16468
45	1	1.16468
50	2	2.32935
55	2	2.32935
60	3	3.49403
65	2	2.32935
70	2	2.32935
75	2	2.32935
80	2	2.32935
85	2	2.32935			Q=(V/A)*(dC/dt)			where: Q - CO flux, mg/m2/s
90	2	2.32935						V - flux chamber volume, m3
95	2	2.32935						A - flux chamber footprint, m2
100	2	2.32935			Q=	0.00351913	mg CO/m2/s	dC/dt - rate of change of CO concentration in the flux chamber with time (from the chart), mg/m3/s
105	2	2.32935				12.6689	mg CO/m2/h
110	2	2.32935
115	3	3.49403
120	3	3.49403
125	3	3.49403
130	3	3.49403
135	3	3.49403
140	3	3.49403
145	3	3.49403
150	3	3.49403
155	3	3.49403
160	3	3.49403
165	3	3.49403
170	3	3.49403
175	3	3.49403
180	3	3.49403
185	3	3.49403
190	3	3.49403
195	2	2.32935
200	2	2.32935
205	2	2.32935
210	2	2.32935
215	2	2.32935
220	2	2.32935
225	2	2.32935
230	2	2.32935
235	2	2.32935
240	2	2.32935
245	2	2.32935
250	2	2.32935
255	2	2.32935
260	2	2.32935
265	2	2.32935
270	4	4.6587
275	4	4.6587
280	4	4.6587
285	5	5.82338
290	5	5.82338
295	5	5.82338
300	5	5.82338

## Sheet: D8
					Temperature inside flux chamber, K	Volume of 1 mole of CO in standard conditions (0 deg C, 1 atm), L	Molecular weight of CO, g/mol	Emitting area enclosed by flux chamber (chamber footprint, A), m2	Volume of flux chamber (V), m3	dC/dt (slope)
					293	22.4	28	0.23	0.071	0.0259
Time (t), s	Measured concentration of CO, ppm	(C) measured CO concentration adjusted to standard conditions (0 deg C, 1 atm), mg/m3
0	0	0
5	0	0
10	0	0
15	0	0
20	0	0
25	0	0
30	0	0
35	1	1.16468
40	0	0
45	0	0
50	1	1.16468
55	1	1.16468
60	1	1.16468
65	1	1.16468
70	1	1.16468
75	1	1.16468
80	1	1.16468
85	1	1.16468			Q=(V/A)*(dC/dt)			where: Q - CO flux, mg/m2/s
90	1	1.16468						V - flux chamber volume, m3
95	2	2.32935						A - flux chamber footprint, m2
100	2	2.32935			Q=	0.00799522	mg CO/m2/s	dC/dt - rate of change of CO concentration in the flux chamber with time (from the chart), mg/m3/s
105	2	2.32935				28.7828	mg CO/m2/h
110	2	2.32935
115	2	2.32935
120	2	2.32935
125	2	2.32935
130	2	2.32935
135	3	3.49403
140	3	3.49403
145	3	3.49403
150	3	3.49403
155	3	3.49403
160	3	3.49403
165	3	3.49403
170	3	3.49403
175	3	3.49403
180	3	3.49403
185	3	3.49403
190	4	4.6587
195	4	4.6587
200	4	4.6587
205	5	5.82338
210	5	5.82338
215	5	5.82338
220	5	5.82338
225	4	4.6587
230	4	4.6587
235	4	4.6587
240	4	4.6587
245	5	5.82338
250	5	5.82338
255	5	5.82338
260	6	6.98805
265	6	6.98805
270	6	6.98805
275	6	6.98805
280	6	6.98805
285	6	6.98805
290	6	6.98805
295	6	6.98805
300	6	6.98805

## Sheet: D9
					Temperature inside flux chamber, K	Volume of 1 mole of CO in standard conditions (0 deg C, 1 atm), L	Molecular weight of CO, g/mol	Emitting area enclosed by flux chamber (chamber footprint, A), m2	Volume of flux chamber (V), m3	dC/dt (slope)
					293	22.4	28	0.23	0.071	0.0185
Time (t), s	Measured concentration of CO, ppm	(C) measured CO concentration adjusted to standard conditions (0 deg C, 1 atm), mg/m3
0	0	0
5	0	0
10	0	0
15	0	0
20	1	1.16468
25	1	1.16468
30	1	1.16468
35	1	1.16468
40	1	1.16468
45	1	1.16468
50	1	1.16468
55	1	1.16468
60	1	1.16468
65	1	1.16468
70	1	1.16468
75	2	2.32935
80	2	2.32935
85	2	2.32935			Q=(V/A)*(dC/dt)			where: Q - CO flux, mg/m2/s
90	2	2.32935						V - flux chamber volume, m3
95	2	2.32935						A - flux chamber footprint, m2
100	2	2.32935			Q=	0.00571087	mg CO/m2/s	dC/dt - rate of change of CO concentration in the flux chamber with time (from the chart), mg/m3/s
105	2	2.32935				20.5591	mg CO/m2/h
110	2	2.32935
115	3	3.49403
120	3	3.49403
125	3	3.49403
130	3	3.49403
135	3	3.49403
140	3	3.49403
145	2	2.32935
150	2	2.32935
155	2	2.32935
160	2	2.32935
165	2	2.32935
170	2	2.32935
175	2	2.32935
180	2	2.32935
185	3	3.49403
190	3	3.49403
195	3	3.49403
200	3	3.49403
205	3	3.49403
210	3	3.49403
215	3	3.49403
220	4	4.6587
225	4	4.6587
230	4	4.6587
235	4	4.6587
240	4	4.6587
245	4	4.6587
250	4	4.6587
255	5	5.82338
260	5	5.82338
265	5	5.82338
270	5	5.82338
275	5	5.82338
280	5	5.82338
285	5	5.82338
290	5	5.82338
295	5	5.82338
300	5	5.82338

## Sheet: Modelling
Modelling of CO emission				Notes
Surface of the pile (Ap)		300	m2
Time (t)		3600	s	Accumulation of CO in airtight hall during time (t)
Headspace volume in the hall		1000	m3	Assumption: the hall is airtight
Number of piles in the hall (n)		4	-
Emitted CO mass in time (t)		39784.7	mg	Estimated as a product of (averaged flux at D1-D9 locations), Ap, t, and n
		39.7847	g	Conversion from mg to g
Concentration of accumulated CO in the hall headspace during 1 hour, estimated for the 'after' turning scenario		39.7847	mg/m3
Molecular weight of CO		28	g/mol
Air temperature in the hall		20	deg C
Ambient pressure		1	atm
Volume of 1 mole of CO in standard conditions (0 deg C, 1 atm)		22.4	L
Concentration of accumulated CO in the hall headspace during 1 hour, estimated for the 'after' turning scenario		46.3363	ppm
Concentration of accumulated CO in the hall headspace during 1 hour, estimated for the 'after' turning scenario		0.00463363	%
