# Supplementary material for: Assessment of Emissions and Potential Occupational Exposure to Carbon Monoxide during Biowaste Composting
Source: Preprints.org preprint supplement (doi:10.20944/preprints202306.1586.v1), 2023-06-22
Supplement: Supplementary file 16 [file Pile 2.2 before turning.xlsx]

## Sheet: D1
					Temperature inside flux chamber, K	Volume of 1 mole of CO in standard conditions (0 deg C, 1 atm), L	Molecular weight of CO, g/mol	Emitting area enclosed by flux chamber (chamber footprint, A), m2	Volume of flux chamber (V), m3	dC/dt (slope)
					293	22.4	28	0.23	0.071	0.0094
Time (t), s	Measured concentration of CO, ppm	(C) measured CO concentration adjusted to standard conditions (0 deg C, 1 atm), mg/m3
0	0	0
5	0	0
10	0	0
15	0	0
20	0	0
25	0	0
30	0	0
35	0	0
40	0	0
45	0	0
50	0	0
55	0	0
60	0	0
65	0	0
70	0	0
75	0	0
80	0	0
85	0	0			Q=(V/A)*(dC/dt)			where: Q - CO flux, mg/m2/s
90	0	0						V - flux chamber volume, m3
95	1	1.16468						A - flux chamber footprint, m2
100	1	1.16468			Q=	0.00290174	mg CO/m2/s	dC/dt - rate of change of CO concentration in the flux chamber with time (from the chart), mg/m3/s
105	1	1.16468				10.4463	mg CO/m2/h
110	1	1.16468
115	1	1.16468
120	1	1.16468
125	1	1.16468
130	1	1.16468
135	1	1.16468
140	1	1.16468
145	1	1.16468
150	1	1.16468
155	1	1.16468
160	1	1.16468
165	1	1.16468
170	2	2.32935
175	2	2.32935
180	2	2.32935
185	2	2.32935
190	1	1.16468
195	1	1.16468
200	1	1.16468
205	1	1.16468
210	1	1.16468
215	1	1.16468
220	1	1.16468
225	1	1.16468
230	2	2.32935
235	2	2.32935
240	2	2.32935
245	2	2.32935
250	2	2.32935
255	2	2.32935
260	2	2.32935
265	2	2.32935
270	2	2.32935
275	2	2.32935
280	2	2.32935
285	2	2.32935
290	2	2.32935
295	2	2.32935
300	2	2.32935

## Sheet: D2
					Temperature inside flux chamber, K	Volume of 1 mole of CO in standard conditions (0 deg C, 1 atm), L	Molecular weight of CO, g/mol	Emitting area enclosed by flux chamber (chamber footprint, A), m2	Volume of flux chamber (V), m3	dC/dt (slope)
					293	22.4	28	0.23	0.071	0.0482
Time (t), s	Measured concentration of CO, ppm	(C) measured CO concentration adjusted to standard conditions (0 deg C, 1 atm), mg/m3
0	0	0
5	0	0
10	0	0
15	0	0
20	0	0
25	0	0
30	0	0
35	1	1.16468
40	1	1.16468
45	1	1.16468
50	2	2.32935
55	2	2.32935
60	3	3.49403
65	3	3.49403
70	3	3.49403
75	3	3.49403
80	3	3.49403
85	4	4.6587			Q=(V/A)*(dC/dt)			where: Q - CO flux, mg/m2/s
90	4	4.6587						V - flux chamber volume, m3
95	5	5.82338						A - flux chamber footprint, m2
100	5	5.82338			Q=	0.0148791	mg CO/m2/s	dC/dt - rate of change of CO concentration in the flux chamber with time (from the chart), mg/m3/s
105	6	6.98805				53.5649	mg CO/m2/h
110	6	6.98805
115	6	6.98805
120	6	6.98805
125	6	6.98805
130	6	6.98805
135	7	8.15273
140	7	8.15273
145	7	8.15273
150	7	8.15273
155	7	8.15273
160	7	8.15273
165	8	9.31741
170	8	9.31741
175	8	9.31741
180	9	10.4821
185	9	10.4821
190	8	9.31741
195	8	9.31741
200	10	11.6468
205	10	11.6468
210	10	11.6468
215	10	11.6468
220	10	11.6468
225	10	11.6468
230	10	11.6468
235	10	11.6468
240	10	11.6468
245	10	11.6468
250	10	11.6468
255	10	11.6468
260	10	11.6468
265	11	12.8114
270	11	12.8114
275	11	12.8114
280	11	12.8114
285	11	12.8114
290	11	12.8114
295	11	12.8114
300	11	12.8114

## Sheet: D3
					Temperature inside flux chamber, K	Volume of 1 mole of CO in standard conditions (0 deg C, 1 atm), L	Molecular weight of CO, g/mol	Emitting area enclosed by flux chamber (chamber footprint, A), m2	Volume of flux chamber (V), m3	dC/dt (slope)
					293	22.4	28	0.23	0.071	0.0125
Time (t), s	Measured concentration of CO, ppm	(C) measured CO concentration adjusted to standard conditions (0 deg C, 1 atm), mg/m3
0	0	0
5	0	0
10	0	0
15	0	0
20	0	0
25	0	0
30	0	0
35	0	0
40	1	1.16468
45	1	1.16468
50	1	1.16468
55	1	1.16468
60	1	1.16468
65	1	1.16468
70	1	1.16468
75	1	1.16468
80	1	1.16468
85	1	1.16468			Q=(V/A)*(dC/dt)			where: Q - CO flux, mg/m2/s
90	1	1.16468						V - flux chamber volume, m3
95	1	1.16468						A - flux chamber footprint, m2
100	1	1.16468			Q=	0.0038587	mg CO/m2/s	dC/dt - rate of change of CO concentration in the flux chamber with time (from the chart), mg/m3/s
105	1	1.16468				13.8913	mg CO/m2/h
110	1	1.16468
115	1	1.16468
120	2	2.32935
125	2	2.32935
130	2	2.32935
135	2	2.32935
140	2	2.32935
145	2	2.32935
150	2	2.32935
155	2	2.32935
160	2	2.32935
165	2	2.32935
170	2	2.32935
175	2	2.32935
180	2	2.32935
185	2	2.32935
190	2	2.32935
195	2	2.32935
200	2	2.32935
205	2	2.32935
210	2	2.32935
215	2	2.32935
220	2	2.32935
225	3	3.49403
230	3	3.49403
235	3	3.49403
240	3	3.49403
245	3	3.49403
250	3	3.49403
255	3	3.49403
260	3	3.49403
265	3	3.49403
270	3	3.49403
275	3	3.49403
280	3	3.49403
285	3	3.49403
290	3	3.49403
295	3	3.49403
300	3	3.49403

## Sheet: D4
					Temperature inside flux chamber, K	Volume of 1 mole of CO in standard conditions (0 deg C, 1 atm), L	Molecular weight of CO, g/mol	Emitting area enclosed by flux chamber (chamber footprint, A), m2	Volume of flux chamber (V), m3	dC/dt (slope)
					293	22.4	28	0.23	0.071	0.0095
Time (t), s	Measured concentration of CO, ppm	(C) measured CO concentration adjusted to standard conditions (0 deg C, 1 atm), mg/m3
0	0	0
5	2	2.32935
10	2	2.32935
15	2	2.32935
20	2	2.32935
25	2	2.32935
30	2	2.32935
35	2	2.32935
40	2	2.32935
45	2	2.32935
50	2	2.32935
55	2	2.32935
60	2	2.32935
65	2	2.32935
70	2	2.32935
75	2	2.32935
80	2	2.32935
85	2	2.32935			Q=(V/A)*(dC/dt)			where: Q - CO flux, mg/m2/s
90	2	2.32935						V - flux chamber volume, m3
95	2	2.32935						A - flux chamber footprint, m2
100	2	2.32935			Q=	0.00293261	mg CO/m2/s	dC/dt - rate of change of CO concentration in the flux chamber with time (from the chart), mg/m3/s
105	2	2.32935				10.5574	mg CO/m2/h
110	2	2.32935
115	3	3.49403
120	3	3.49403
125	3	3.49403
130	3	3.49403
135	3	3.49403
140	3	3.49403
145	3	3.49403
150	3	3.49403
155	3	3.49403
160	3	3.49403
165	3	3.49403
170	3	3.49403
175	3	3.49403
180	3	3.49403
185	3	3.49403
190	3	3.49403
195	3	3.49403
200	3	3.49403
205	3	3.49403
210	3	3.49403
215	3	3.49403
220	3	3.49403
225	3	3.49403
230	3	3.49403
235	3	3.49403
240	3	3.49403
245	3	3.49403
250	4	4.6587
255	4	4.6587
260	4	4.6587
265	4	4.6587
270	4	4.6587
275	4	4.6587
280	4	4.6587
285	4	4.6587
290	4	4.6587
295	4	4.6587
300	4	4.6587

## Sheet: D5
					Temperature inside flux chamber, K	Volume of 1 mole of CO in standard conditions (0 deg C, 1 atm), L	Molecular weight of CO, g/mol	Emitting area enclosed by flux chamber (chamber footprint, A), m2	Volume of flux chamber (V), m3	dC/dt (slope)
					293	22.4	28	0.23	0.071	0.0248
Time (t), s	Measured concentration of CO, ppm	(C) measured CO concentration adjusted to standard conditions (0 deg C, 1 atm), mg/m3
0	0	0
5	0	0
10	0	0
15	0	0
20	0	0
25	1	1.16468
30	1	1.16468
35	1	1.16468
40	1	1.16468
45	2	2.32935
50	2	2.32935
55	1	1.16468
60	1	1.16468
65	1	1.16468
70	2	2.32935
75	2	2.32935
80	2	2.32935
85	2	2.32935			Q=(V/A)*(dC/dt)			where: Q - CO flux, mg/m2/s
90	2	2.32935						V - flux chamber volume, m3
95	2	2.32935						A - flux chamber footprint, m2
100	3	3.49403			Q=	0.00765565	mg CO/m2/s	dC/dt - rate of change of CO concentration in the flux chamber with time (from the chart), mg/m3/s
105	3	3.49403				27.5603	mg CO/m2/h
110	3	3.49403
115	3	3.49403
120	3	3.49403
125	3	3.49403
130	4	4.6587
135	4	4.6587
140	4	4.6587
145	4	4.6587
150	4	4.6587
155	4	4.6587
160	4	4.6587
165	4	4.6587
170	4	4.6587
175	5	5.82338
180	5	5.82338
185	5	5.82338
190	5	5.82338
195	5	5.82338
200	5	5.82338
205	5	5.82338
210	5	5.82338
215	6	6.98805
220	6	6.98805
225	6	6.98805
230	6	6.98805
235	6	6.98805
240	5	5.82338
245	5	5.82338
250	5	5.82338
255	5	5.82338
260	5	5.82338
265	5	5.82338
270	6	6.98805
275	6	6.98805
280	6	6.98805
285	6	6.98805
290	6	6.98805
295	6	6.98805
300	6	6.98805

## Sheet: D6
					Temperature inside flux chamber, K	Volume of 1 mole of CO in standard conditions (0 deg C, 1 atm), L	Molecular weight of CO, g/mol	Emitting area enclosed by flux chamber (chamber footprint, A), m2	Volume of flux chamber (V), m3	dC/dt (slope)
					293	22.4	28	0.23	0.071	0.015
Time (t), s	Measured concentration of CO, ppm	(C) measured CO concentration adjusted to standard conditions (0 deg C, 1 atm), mg/m3
0	0	0
5	0	0
10	0	0
15	1	1.16468
20	1	1.16468
25	1	1.16468
30	1	1.16468
35	1	1.16468
40	1	1.16468
45	1	1.16468
50	1	1.16468
55	1	1.16468
60	2	2.32935
65	2	2.32935
70	2	2.32935
75	2	2.32935
80	2	2.32935
85	2	2.32935			Q=(V/A)*(dC/dt)			where: Q - CO flux, mg/m2/s
90	2	2.32935						V - flux chamber volume, m3
95	2	2.32935						A - flux chamber footprint, m2
100	2	2.32935			Q=	0.00463043	mg CO/m2/s	dC/dt - rate of change of CO concentration in the flux chamber with time (from the chart), mg/m3/s
105	2	2.32935				16.6696	mg CO/m2/h
110	2	2.32935
115	2	2.32935
120	2	2.32935
125	2	2.32935
130	2	2.32935
135	2	2.32935
140	2	2.32935
145	2	2.32935
150	3	3.49403
155	3	3.49403
160	3	3.49403
165	3	3.49403
170	3	3.49403
175	3	3.49403
180	3	3.49403
185	3	3.49403
190	3	3.49403
195	3	3.49403
200	3	3.49403
205	3	3.49403
210	3	3.49403
215	3	3.49403
220	4	4.6587
225	4	4.6587
230	4	4.6587
235	4	4.6587
240	4	4.6587
245	4	4.6587
250	4	4.6587
255	4	4.6587
260	4	4.6587
265	4	4.6587
270	4	4.6587
275	4	4.6587
280	4	4.6587
285	4	4.6587
290	4	4.6587
295	4	4.6587
300	4	4.6587

## Sheet: D7
					Temperature inside flux chamber, K	Volume of 1 mole of CO in standard conditions (0 deg C, 1 atm), L	Molecular weight of CO, g/mol	Emitting area enclosed by flux chamber (chamber footprint, A), m2	Volume of flux chamber (V), m3	dC/dt (slope)
					293	22.4	28	0.23	0.071	0.0087
Time (t), s	Measured concentration of CO, ppm	(C) measured CO concentration adjusted to standard conditions (0 deg C, 1 atm), mg/m3
0	0	0
5	0	0
10	0	0
15	0	0
20	0	0
25	0	0
30	0	0
35	0	0
40	0	0
45	0	0
50	0	0
55	0	0
60	0	0
65	0	0
70	1	1.16468
75	1	1.16468
80	1	1.16468
85	1	1.16468			Q=(V/A)*(dC/dt)			where: Q - CO flux, mg/m2/s
90	1	1.16468						V - flux chamber volume, m3
95	1	1.16468						A - flux chamber footprint, m2
100	1	1.16468			Q=	0.00268565	mg CO/m2/s	dC/dt - rate of change of CO concentration in the flux chamber with time (from the chart), mg/m3/s
105	1	1.16468				9.66835	mg CO/m2/h
110	1	1.16468
115	1	1.16468
120	1	1.16468
125	1	1.16468
130	1	1.16468
135	1	1.16468
140	1	1.16468
145	1	1.16468
150	1	1.16468
155	1	1.16468
160	1	1.16468
165	2	2.32935
170	2	2.32935
175	2	2.32935
180	2	2.32935
185	1	1.16468
190	1	1.16468
195	1	1.16468
200	1	1.16468
205	1	1.16468
210	1	1.16468
215	1	1.16468
220	1	1.16468
225	2	2.32935
230	2	2.32935
235	2	2.32935
240	2	2.32935
245	2	2.32935
250	2	2.32935
255	2	2.32935
260	2	2.32935
265	2	2.32935
270	2	2.32935
275	2	2.32935
280	2	2.32935
285	2	2.32935
290	2	2.32935
295	2	2.32935
300	2	2.32935

## Sheet: D8
					Temperature inside flux chamber, K	Volume of 1 mole of CO in standard conditions (0 deg C, 1 atm), L	Molecular weight of CO, g/mol	Emitting area enclosed by flux chamber (chamber footprint, A), m2	Volume of flux chamber (V), m3	dC/dt (slope)
					293	22.4	28	0.23	0.071	0.0136
Time (t), s	Measured concentration of CO, ppm	(C) measured CO concentration adjusted to standard conditions (0 deg C, 1 atm), mg/m3
0	0	0
5	0	0
10	0	0
15	0	0
20	0	0
25	0	0
30	0	0
35	0	0
40	0	0
45	0	0
50	0	0
55	0	0
60	1	1.16468
65	1	1.16468
70	1	1.16468
75	1	1.16468
80	1	1.16468
85	1	1.16468			Q=(V/A)*(dC/dt)			where: Q - CO flux, mg/m2/s
90	1	1.16468						V - flux chamber volume, m3
95	1	1.16468						A - flux chamber footprint, m2
100	1	1.16468			Q=	0.00419826	mg CO/m2/s	dC/dt - rate of change of CO concentration in the flux chamber with time (from the chart), mg/m3/s
105	0	0				15.1137	mg CO/m2/h
110	0	0
115	0	0
120	0	0
125	0	0
130	1	1.16468
135	1	1.16468
140	1	1.16468
145	1	1.16468
150	1	1.16468
155	1	1.16468
160	1	1.16468
165	1	1.16468
170	1	1.16468
175	1	1.16468
180	1	1.16468
185	2	2.32935
190	2	2.32935
195	2	2.32935
200	2	2.32935
205	2	2.32935
210	2	2.32935
215	2	2.32935
220	2	2.32935
225	2	2.32935
230	2	2.32935
235	3	3.49403
240	3	3.49403
245	3	3.49403
250	3	3.49403
255	3	3.49403
260	3	3.49403
265	3	3.49403
270	3	3.49403
275	3	3.49403
280	3	3.49403
285	3	3.49403
290	3	3.49403
295	3	3.49403
300	3	3.49403

## Sheet: D9
					Temperature inside flux chamber, K	Volume of 1 mole of CO in standard conditions (0 deg C, 1 atm), L	Molecular weight of CO, g/mol	Emitting area enclosed by flux chamber (chamber footprint, A), m2	Volume of flux chamber (V), m3	dC/dt (slope)
					293	22.4	28	0.23	0.071	0.0159
Time (t), s	Measured concentration of CO, ppm	(C) measured CO concentration adjusted to standard conditions (0 deg C, 1 atm), mg/m3
0	0	0
5	0	0
10	0	0
15	0	0
20	0	0
25	0	0
30	0	0
35	0	0
40	0	0
45	0	0
50	0	0
55	0	0
60	0	0
65	0	0
70	0	0
75	1	1.16468
80	1	1.16468
85	1	1.16468			Q=(V/A)*(dC/dt)			where: Q - CO flux, mg/m2/s
90	1	1.16468						V - flux chamber volume, m3
95	1	1.16468						A - flux chamber footprint, m2
100	1	1.16468			Q=	0.00490826	mg CO/m2/s	dC/dt - rate of change of CO concentration in the flux chamber with time (from the chart), mg/m3/s
105	1	1.16468				17.6697	mg CO/m2/h
110	1	1.16468
115	1	1.16468
120	1	1.16468
125	1	1.16468
130	1	1.16468
135	1	1.16468
140	1	1.16468
145	1	1.16468
150	2	2.32935
155	2	2.32935
160	2	2.32935
165	2	2.32935
170	2	2.32935
175	2	2.32935
180	2	2.32935
185	2	2.32935
190	2	2.32935
195	2	2.32935
200	2	2.32935
205	3	3.49403
210	3	3.49403
215	3	3.49403
220	3	3.49403
225	3	3.49403
230	4	4.6587
235	4	4.6587
240	4	4.6587
245	4	4.6587
250	3	3.49403
255	3	3.49403
260	3	3.49403
265	3	3.49403
270	3	3.49403
275	3	3.49403
280	3	3.49403
285	3	3.49403
290	3	3.49403
295	3	3.49403
300	3	3.49403

## Sheet: Modelling
Modelling of CO emission				Notes
Surface of the pile (Ap)		300	m2
Time (t)		3600	s	Accumulation of CO in airtight hall during time (t)
Headspace volume in the hall		1000	m3	Assumption: the hall is airtight
Number of piles in the hall (n)		4	-
Emitted CO mass in time (t)		23352.2	mg	Estimated as a product of (averaged flux at D1-D9 locations), Ap, t, and n
		23.3522	g	Conversion from mg to g
Concentration of accumulated CO in the hall headspace during 1 hour, estimated for the 'before' turning scenario		23.3522	mg/m3
Molecular weight of CO		28	g/mol
Air temperature in the hall		20	deg C
Ambient pressure		1	atm
Volume of 1 mole of CO in standard conditions (0 deg C, 1 atm)		22.4	L
Concentration of accumulated CO in the hall headspace during 1 hour, estimated for the 'before' turning scenario		27.1978	ppm
Concentration of accumulated CO in the hall headspace during 1 hour, estimated for the 'before' turning scenario		0.00271978	%
