# Supplementary material for: Assessment of Emissions and Potential Occupational Exposure to Carbon Monoxide during Biowaste Composting
Source: Preprints.org preprint supplement (doi:10.20944/preprints202306.1586.v1), 2023-06-22
Supplement: Supplementary file 18 [file Pile 2.3 after turning.xlsx]

## Sheet: D1
					Temperature inside flux chamber, K	Volume of 1 mole of CO in standard conditions (0 deg C, 1 atm), L	Molecular weight of CO, g/mol	Emitting area enclosed by flux chamber (chamber footprint, A), m2	Volume of flux chamber (V), m3	dC/dt (slope)
					293	22.4	28	0.23	0.071	0.0788
Time (t), s	Measured concentration of CO, ppm	(C) measured CO concentration adjusted to standard conditions (0 deg C, 1 atm), mg/m3
0	0	0
5	0	0
10	0	0
15	0	0
20	0	0
25	0	0
30	0	0
35	0	0
40	1	1.16468
45	1	1.16468
50	0	0
55	0	0
60	1	1.16468
65	1	1.16468
70	1	1.16468
75	1	1.16468
80	1	1.16468
85	2	2.32935			Q=(V/A)*(dC/dt)			where: Q - CO flux, mg/m2/s
90	2	2.32935						V - flux chamber volume, m3
95	2	2.32935						A - flux chamber footprint, m2
100	2	2.32935			Q=	0.0243252	mg CO/m2/s	dC/dt - rate of change of CO concentration in the flux chamber with time (from the chart), mg/m3/s
105	3	3.49403				87.5708	mg CO/m2/h
110	3	3.49403
115	3	3.49403
120	4	4.6587
125	4	4.6587
130	5	5.82338
135	5	5.82338
140	5	5.82338
145	6	6.98805
150	6	6.98805
155	7	8.15273
160	7	8.15273
165	8	9.31741
170	8	9.31741
175	8	9.31741
180	9	10.4821
185	9	10.4821
190	9	10.4821
195	10	11.6468
200	10	11.6468
205	11	12.8114
210	11	12.8114
215	12	13.9761
220	12	13.9761
225	13	15.1408
230	13	15.1408
235	13	15.1408
240	15	17.4701
245	15	17.4701
250	15	17.4701
255	15	17.4701
260	16	18.6348
265	16	18.6348
270	16	18.6348
275	17	19.7995
280	17	19.7995
285	17	19.7995
290	17	19.7995
295	17	19.7995
300	17	19.7995

## Sheet: D2
					Temperature inside flux chamber, K	Volume of 1 mole of CO in standard conditions (0 deg C, 1 atm), L	Molecular weight of CO, g/mol	Emitting area enclosed by flux chamber (chamber footprint, A), m2	Volume of flux chamber (V), m3	dC/dt (slope)
					293	22.4	28	0.23	0.071	0.0713
Time (t), s	Measured concentration of CO, ppm	(C) measured CO concentration adjusted to standard conditions (0 deg C, 1 atm), mg/m3
0	0	0
5	1	1.16468
10	1	1.16468
15	1	1.16468
20	1	1.16468
25	1	1.16468
30	1	1.16468
35	1	1.16468
40	1	1.16468
45	1	1.16468
50	1	1.16468
55	2	2.32935
60	2	2.32935
65	2	2.32935
70	3	3.49403
75	3	3.49403
80	3	3.49403
85	4	4.6587			Q=(V/A)*(dC/dt)			where: Q - CO flux, mg/m2/s
90	4	4.6587						V - flux chamber volume, m3
95	4	4.6587						A - flux chamber footprint, m2
100	5	5.82338			Q=	0.02201	mg CO/m2/s	dC/dt - rate of change of CO concentration in the flux chamber with time (from the chart), mg/m3/s
105	5	5.82338				79.236	mg CO/m2/h
110	5	5.82338
115	6	6.98805
120	6	6.98805
125	6	6.98805
130	7	8.15273
135	7	8.15273
140	7	8.15273
145	7	8.15273
150	9	10.4821
155	9	10.4821
160	9	10.4821
165	10	11.6468
170	10	11.6468
175	11	12.8114
180	11	12.8114
185	11	12.8114
190	11	12.8114
195	12	13.9761
200	12	13.9761
205	12	13.9761
210	13	15.1408
215	13	15.1408
220	13	15.1408
225	14	16.3055
230	14	16.3055
235	14	16.3055
240	14	16.3055
245	14	16.3055
250	15	17.4701
255	15	17.4701
260	15	17.4701
265	15	17.4701
270	15	17.4701
275	16	18.6348
280	16	18.6348
285	16	18.6348
290	16	18.6348
295	16	18.6348
300	16	18.6348

## Sheet: D3
					Temperature inside flux chamber, K	Volume of 1 mole of CO in standard conditions (0 deg C, 1 atm), L	Molecular weight of CO, g/mol	Emitting area enclosed by flux chamber (chamber footprint, A), m2	Volume of flux chamber (V), m3	dC/dt (slope)
					293	22.4	28	0.23	0.071	0.0682
Time (t), s	Measured concentration of CO, ppm	(C) measured CO concentration adjusted to standard conditions (0 deg C, 1 atm), mg/m3
0	0	0
5	0	0
10	0	0
15	0	0
20	0	0
25	0	0
30	1	1.16468
35	1	1.16468
40	1	1.16468
45	2	2.32935
50	2	2.32935
55	2	2.32935
60	2	2.32935
65	3	3.49403
70	3	3.49403
75	3	3.49403
80	3	3.49403
85	5	5.82338			Q=(V/A)*(dC/dt)			where: Q - CO flux, mg/m2/s
90	5	5.82338						V - flux chamber volume, m3
95	5	5.82338						A - flux chamber footprint, m2
100	6	6.98805			Q=	0.021053	mg CO/m2/s	dC/dt - rate of change of CO concentration in the flux chamber with time (from the chart), mg/m3/s
105	6	6.98805				75.791	mg CO/m2/h
110	7	8.15273
115	7	8.15273
120	7	8.15273
125	8	9.31741
130	8	9.31741
135	8	9.31741
140	9	10.4821
145	9	10.4821
150	9	10.4821
155	10	11.6468
160	10	11.6468
165	10	11.6468
170	10	11.6468
175	11	12.8114
180	11	12.8114
185	11	12.8114
190	12	13.9761
195	12	13.9761
200	12	13.9761
205	12	13.9761
210	12	13.9761
215	13	15.1408
220	13	15.1408
225	13	15.1408
230	14	16.3055
235	14	16.3055
240	14	16.3055
245	14	16.3055
250	14	16.3055
255	14	16.3055
260	15	17.4701
265	15	17.4701
270	15	17.4701
275	15	17.4701
280	15	17.4701
285	15	17.4701
290	15	17.4701
295	15	17.4701
300	15	17.4701

## Sheet: D4
					Temperature inside flux chamber, K	Volume of 1 mole of CO in standard conditions (0 deg C, 1 atm), L	Molecular weight of CO, g/mol	Emitting area enclosed by flux chamber (chamber footprint, A), m2	Volume of flux chamber (V), m3	dC/dt (slope)
					293	22.4	28	0.23	0.071	0.0904
Time (t), s	Measured concentration of CO, ppm	(C) measured CO concentration adjusted to standard conditions (0 deg C, 1 atm), mg/m3
0	0	0
5	2	2.32935
10	2	2.32935
15	2	2.32935
20	2	2.32935
25	2	2.32935
30	2	2.32935
35	2	2.32935
40	2	2.32935
45	2	2.32935
50	2	2.32935
55	3	3.49403
60	3	3.49403
65	3	3.49403
70	3	3.49403
75	4	4.6587
80	4	4.6587
85	4	4.6587			Q=(V/A)*(dC/dt)			where: Q - CO flux, mg/m2/s
90	5	5.82338						V - flux chamber volume, m3
95	5	5.82338						A - flux chamber footprint, m2
100	6	6.98805			Q=	0.0279061	mg CO/m2/s	dC/dt - rate of change of CO concentration in the flux chamber with time (from the chart), mg/m3/s
105	6	6.98805				100.462	mg CO/m2/h
110	6	6.98805
115	8	9.31741
120	8	9.31741
125	9	10.4821
130	9	10.4821
135	9	10.4821
140	10	11.6468
145	10	11.6468
150	11	12.8114
155	11	12.8114
160	11	12.8114
165	13	15.1408
170	13	15.1408
175	13	15.1408
180	14	16.3055
185	14	16.3055
190	14	16.3055
195	15	17.4701
200	15	17.4701
205	16	18.6348
210	16	18.6348
215	17	19.7995
220	17	19.7995
225	17	19.7995
230	18	20.9642
235	18	20.9642
240	18	20.9642
245	19	22.1288
250	19	22.1288
255	19	22.1288
260	20	23.2935
265	20	23.2935
270	20	23.2935
275	20	23.2935
280	21	24.4582
285	21	24.4582
290	21	24.4582
295	21	24.4582
300	21	24.4582

## Sheet: D5
					Temperature inside flux chamber, K	Volume of 1 mole of CO in standard conditions (0 deg C, 1 atm), L	Molecular weight of CO, g/mol	Emitting area enclosed by flux chamber (chamber footprint, A), m2	Volume of flux chamber (V), m3	dC/dt (slope)
					293	22.4	28	0.23	0.071	0.0654
Time (t), s	Measured concentration of CO, ppm	(C) measured CO concentration adjusted to standard conditions (0 deg C, 1 atm), mg/m3
0	0	0
5	2	2.32935
10	2	2.32935
15	2	2.32935
20	2	2.32935
25	2	2.32935
30	2	2.32935
35	2	2.32935
40	2	2.32935
45	2	2.32935
50	2	2.32935
55	2	2.32935
60	2	2.32935
65	2	2.32935
70	2	2.32935
75	2	2.32935
80	2	2.32935
85	2	2.32935			Q=(V/A)*(dC/dt)			where: Q - CO flux, mg/m2/s
90	2	2.32935						V - flux chamber volume, m3
95	2	2.32935						A - flux chamber footprint, m2
100	2	2.32935			Q=	0.0201887	mg CO/m2/s	dC/dt - rate of change of CO concentration in the flux chamber with time (from the chart), mg/m3/s
105	3	3.49403				72.6793	mg CO/m2/h
110	3	3.49403
115	3	3.49403
120	3	3.49403
125	3	3.49403
130	4	4.6587
135	4	4.6587
140	5	5.82338
145	5	5.82338
150	5	5.82338
155	6	6.98805
160	6	6.98805
165	7	8.15273
170	7	8.15273
175	8	9.31741
180	9	10.4821
185	9	10.4821
190	10	11.6468
195	10	11.6468
200	11	12.8114
205	11	12.8114
210	12	13.9761
215	12	13.9761
220	12	13.9761
225	12	13.9761
230	13	15.1408
235	13	15.1408
240	13	15.1408
245	14	16.3055
250	14	16.3055
255	14	16.3055
260	14	16.3055
265	14	16.3055
270	15	17.4701
275	15	17.4701
280	15	17.4701
285	15	17.4701
290	15	17.4701
295	15	17.4701
300	15	17.4701

## Sheet: D6
					Temperature inside flux chamber, K	Volume of 1 mole of CO in standard conditions (0 deg C, 1 atm), L	Molecular weight of CO, g/mol	Emitting area enclosed by flux chamber (chamber footprint, A), m2	Volume of flux chamber (V), m3	dC/dt (slope)
					293	22.4	28	0.23	0.071	0.0704
Time (t), s	Measured concentration of CO, ppm	(C) measured CO concentration adjusted to standard conditions (0 deg C, 1 atm), mg/m3
0	0	0
5	3	3.49403
10	3	3.49403
15	3	3.49403
20	3	3.49403
25	5	5.82338
30	5	5.82338
35	5	5.82338
40	6	6.98805
45	6	6.98805
50	7	8.15273
55	7	8.15273
60	8	9.31741
65	8	9.31741
70	8	9.31741
75	9	10.4821
80	9	10.4821
85	9	10.4821			Q=(V/A)*(dC/dt)			where: Q - CO flux, mg/m2/s
90	10	11.6468						V - flux chamber volume, m3
95	10	11.6468						A - flux chamber footprint, m2
100	10	11.6468			Q=	0.0217322	mg CO/m2/s	dC/dt - rate of change of CO concentration in the flux chamber with time (from the chart), mg/m3/s
105	10	11.6468				78.2358	mg CO/m2/h
110	12	13.9761
115	12	13.9761
120	12	13.9761
125	13	15.1408
130	13	15.1408
135	13	15.1408
140	13	15.1408
145	13	15.1408
150	14	16.3055
155	14	16.3055
160	14	16.3055
165	14	16.3055
170	15	17.4701
175	15	17.4701
180	15	17.4701
185	16	18.6348
190	16	18.6348
195	16	18.6348
200	16	18.6348
205	16	18.6348
210	17	19.7995
215	17	19.7995
220	17	19.7995
225	18	20.9642
230	18	20.9642
235	18	20.9642
240	18	20.9642
245	18	20.9642
250	19	22.1288
255	19	22.1288
260	19	22.1288
265	19	22.1288
270	19	22.1288
275	19	22.1288
280	20	23.2935
285	20	23.2935
290	20	23.2935
295	20	23.2935
300	20	23.2935

## Sheet: D7
					Temperature inside flux chamber, K	Volume of 1 mole of CO in standard conditions (0 deg C, 1 atm), L	Molecular weight of CO, g/mol	Emitting area enclosed by flux chamber (chamber footprint, A), m2	Volume of flux chamber (V), m3	dC/dt (slope)
					293	22.4	28	0.23	0.071	0.0334
Time (t), s	Measured concentration of CO, ppm	(C) measured CO concentration adjusted to standard conditions (0 deg C, 1 atm), mg/m3
0	0	0
5	0	0
10	0	0
15	0	0
20	0	0
25	0	0
30	0	0
35	0	0
40	2	2.32935
45	2	2.32935
50	2	2.32935
55	2	2.32935
60	2	2.32935
65	2	2.32935
70	2	2.32935
75	2	2.32935
80	2	2.32935
85	2	2.32935			Q=(V/A)*(dC/dt)			where: Q - CO flux, mg/m2/s
90	2	2.32935						V - flux chamber volume, m3
95	2	2.32935						A - flux chamber footprint, m2
100	2	2.32935			Q=	0.0103104	mg CO/m2/s	dC/dt - rate of change of CO concentration in the flux chamber with time (from the chart), mg/m3/s
105	2	2.32935				37.1176	mg CO/m2/h
110	2	2.32935
115	2	2.32935
120	3	3.49403
125	3	3.49403
130	3	3.49403
135	3	3.49403
140	3	3.49403
145	3	3.49403
150	3	3.49403
155	3	3.49403
160	3	3.49403
165	3	3.49403
170	3	3.49403
175	3	3.49403
180	3	3.49403
185	3	3.49403
190	3	3.49403
195	4	4.6587
200	4	4.6587
205	4	4.6587
210	5	5.82338
215	6	6.98805
220	6	6.98805
225	6	6.98805
230	6	6.98805
235	7	8.15273
240	7	8.15273
245	7	8.15273
250	7	8.15273
255	7	8.15273
260	7	8.15273
265	8	9.31741
270	8	9.31741
275	8	9.31741
280	8	9.31741
285	8	9.31741
290	9	10.4821
295	9	10.4821
300	9	10.4821

## Sheet: D8
					Temperature inside flux chamber, K	Volume of 1 mole of CO in standard conditions (0 deg C, 1 atm), L	Molecular weight of CO, g/mol	Emitting area enclosed by flux chamber (chamber footprint, A), m2	Volume of flux chamber (V), m3	dC/dt (slope)
					293	22.4	28	0.23	0.071	0.0437
Time (t), s	Measured concentration of CO, ppm	(C) measured CO concentration adjusted to standard conditions (0 deg C, 1 atm), mg/m3
0	0	0
5	0	0
10	0	0
15	0	0
20	0	0
25	0	0
30	0	0
35	0	0
40	1	1.16468
45	1	1.16468
50	1	1.16468
55	1	1.16468
60	1	1.16468
65	2	2.32935
70	2	2.32935
75	2	2.32935
80	2	2.32935
85	2	2.32935			Q=(V/A)*(dC/dt)			where: Q - CO flux, mg/m2/s
90	2	2.32935						V - flux chamber volume, m3
95	3	3.49403						A - flux chamber footprint, m2
100	3	3.49403			Q=	0.01349	mg CO/m2/s	dC/dt - rate of change of CO concentration in the flux chamber with time (from the chart), mg/m3/s
105	3	3.49403				48.564	mg CO/m2/h
110	4	4.6587
115	4	4.6587
120	4	4.6587
125	5	5.82338
130	5	5.82338
135	5	5.82338
140	5	5.82338
145	6	6.98805
150	6	6.98805
155	6	6.98805
160	6	6.98805
165	6	6.98805
170	6	6.98805
175	6	6.98805
180	7	8.15273
185	7	8.15273
190	7	8.15273
195	7	8.15273
200	7	8.15273
205	7	8.15273
210	7	8.15273
215	7	8.15273
220	8	9.31741
225	8	9.31741
230	8	9.31741
235	8	9.31741
240	8	9.31741
245	9	10.4821
250	9	10.4821
255	9	10.4821
260	9	10.4821
265	9	10.4821
270	9	10.4821
275	10	11.6468
280	10	11.6468
285	10	11.6468
290	10	11.6468
295	10	11.6468
300	10	11.6468

## Sheet: D9
					Temperature inside flux chamber, K	Volume of 1 mole of CO in standard conditions (0 deg C, 1 atm), L	Molecular weight of CO, g/mol	Emitting area enclosed by flux chamber (chamber footprint, A), m2	Volume of flux chamber (V), m3	dC/dt (slope)
					293	22.4	28	0.23	0.071	0.035
Time (t), s	Measured concentration of CO, ppm	(C) measured CO concentration adjusted to standard conditions (0 deg C, 1 atm), mg/m3
0	0	0
5	0	0
10	0	0
15	0	0
20	0	0
25	1	1.16468
30	1	1.16468
35	1	1.16468
40	3	3.49403
45	3	3.49403
50	3	3.49403
55	3	3.49403
60	3	3.49403
65	3	3.49403
70	4	4.6587
75	4	4.6587
80	4	4.6587
85	4	4.6587			Q=(V/A)*(dC/dt)			where: Q - CO flux, mg/m2/s
90	4	4.6587						V - flux chamber volume, m3
95	4	4.6587						A - flux chamber footprint, m2
100	5	5.82338			Q=	0.0108043	mg CO/m2/s	dC/dt - rate of change of CO concentration in the flux chamber with time (from the chart), mg/m3/s
105	5	5.82338				38.8957	mg CO/m2/h
110	5	5.82338
115	5	5.82338
120	5	5.82338
125	5	5.82338
130	5	5.82338
135	5	5.82338
140	5	5.82338
145	5	5.82338
150	6	6.98805
155	6	6.98805
160	6	6.98805
165	6	6.98805
170	6	6.98805
175	6	6.98805
180	6	6.98805
185	7	8.15273
190	7	8.15273
195	7	8.15273
200	7	8.15273
205	7	8.15273
210	7	8.15273
215	7	8.15273
220	8	9.31741
225	8	9.31741
230	8	9.31741
235	8	9.31741
240	8	9.31741
245	8	9.31741
250	8	9.31741
255	9	10.4821
260	9	10.4821
265	9	10.4821
270	9	10.4821
275	9	10.4821
280	9	10.4821
285	9	10.4821
290	9	10.4821
295	9	10.4821
300	9	10.4821

## Sheet: Modelling
Modelling of CO emission				Notes
Surface of the pile (Ap)		300	m2
Time (t)		3600	s	Accumulation of CO in airtight hall during time (t)
Headspace volume in the hall		1000	m3	Assumption: the hall is airtight
Number of piles in the hall (n)		4	-
Emitted CO mass in time (t)		82473.6	mg	Estimated as a product of (averaged flux at D1-D9 locations), Ap, t, and n
		82.4736	g	Conversion from mg to g
Concentration of accumulated CO in the hall headspace during 1 hour, estimated for the 'after' turning scenario		82.4736	mg/m3
Molecular weight of CO		28	g/mol
Air temperature in the hall		20	deg C
Ambient pressure		1	atm
Volume of 1 mole of CO in standard conditions (0 deg C, 1 atm)		22.4	L
Concentration of accumulated CO in the hall headspace during 1 hour, estimated for the 'after' turning scenario		96.055	ppm
Concentration of accumulated CO in the hall headspace during 1 hour, estimated for the 'after' turning scenario		0.0096055	%
