# Supplementary material for: Assessment of Emissions and Potential Occupational Exposure to Carbon Monoxide during Biowaste Composting
Source: Preprints.org preprint supplement (doi:10.20944/preprints202306.1586.v1), 2023-06-22
Supplement: Supplementary file 20 [file Pile 2.3 before turning.xlsx]

## Sheet: D1
					Temperature inside flux chamber, K	Volume of 1 mole of CO in standard conditions (0 deg C, 1 atm), L	Molecular weight of CO, g/mol	Emitting area enclosed by flux chamber (chamber footprint, A), m2	Volume of flux chamber (V), m3	dC/dt (slope)
					293	22.4	28	0.23	0.071	0.0454
Time (t), s	Measured concentration of CO, ppm	(C) measured CO concentration adjusted to standard conditions (0 deg C, 1 atm), mg/m3
0	0	0
5	0	0
10	0	0
15	0	0
20	0	0
25	1	1.16468
30	1	1.16468
35	2	2.32935
40	2	2.32935
45	2	2.32935
50	2	2.32935
55	3	3.49403
60	3	3.49403
65	3	3.49403
70	3	3.49403
75	3	3.49403
80	4	4.6587
85	4	4.6587			Q=(V/A)*(dC/dt)			where: Q - CO flux, mg/m2/s
90	4	4.6587						V - flux chamber volume, m3
95	4	4.6587						A - flux chamber footprint, m2
100	4	4.6587			Q=	0.0140148	mg CO/m2/s	dC/dt - rate of change of CO concentration in the flux chamber with time (from the chart), mg/m3/s
105	5	5.82338				50.4532	mg CO/m2/h
110	5	5.82338
115	5	5.82338
120	6	6.98805
125	6	6.98805
130	6	6.98805
135	6	6.98805
140	6	6.98805
145	6	6.98805
150	6	6.98805
155	7	8.15273
160	7	8.15273
165	7	8.15273
170	7	8.15273
175	7	8.15273
180	8	9.31741
185	8	9.31741
190	8	9.31741
195	8	9.31741
200	8	9.31741
205	8	9.31741
210	9	10.4821
215	9	10.4821
220	9	10.4821
225	9	10.4821
230	9	10.4821
235	10	11.6468
240	10	11.6468
245	10	11.6468
250	10	11.6468
255	10	11.6468
260	10	11.6468
265	11	12.8114
270	11	12.8114
275	11	12.8114
280	11	12.8114
285	11	12.8114
290	11	12.8114
295	11	12.8114
300	11	12.8114

## Sheet: D2
					Temperature inside flux chamber, K	Volume of 1 mole of CO in standard conditions (0 deg C, 1 atm), L	Molecular weight of CO, g/mol	Emitting area enclosed by flux chamber (chamber footprint, A), m2	Volume of flux chamber (V), m3	dC/dt (slope)
					293	22.4	28	0.23	0.071	0.0537
Time (t), s	Measured concentration of CO, ppm	(C) measured CO concentration adjusted to standard conditions (0 deg C, 1 atm), mg/m3
0	0	0
5	1	1.16468
10	1	1.16468
15	1	1.16468
20	1	1.16468
25	1	1.16468
30	1	1.16468
35	1	1.16468
40	1	1.16468
45	1	1.16468
50	1	1.16468
55	1	1.16468
60	1	1.16468
65	2	2.32935
70	2	2.32935
75	2	2.32935
80	2	2.32935
85	3	3.49403			Q=(V/A)*(dC/dt)			where: Q - CO flux, mg/m2/s
90	3	3.49403						V - flux chamber volume, m3
95	3	3.49403						A - flux chamber footprint, m2
100	4	4.6587			Q=	0.016577	mg CO/m2/s	dC/dt - rate of change of CO concentration in the flux chamber with time (from the chart), mg/m3/s
105	4	4.6587				59.677	mg CO/m2/h
110	5	5.82338
115	5	5.82338
120	6	6.98805
125	6	6.98805
130	6	6.98805
135	7	8.15273
140	7	8.15273
145	7	8.15273
150	8	9.31741
155	8	9.31741
160	8	9.31741
165	8	9.31741
170	8	9.31741
175	9	10.4821
180	9	10.4821
185	9	10.4821
190	9	10.4821
195	9	10.4821
200	9	10.4821
205	9	10.4821
210	10	11.6468
215	10	11.6468
220	10	11.6468
225	10	11.6468
230	11	12.8114
235	11	12.8114
240	11	12.8114
245	11	12.8114
250	11	12.8114
255	11	12.8114
260	12	13.9761
265	12	13.9761
270	12	13.9761
275	12	13.9761
280	12	13.9761
285	12	13.9761
290	12	13.9761
295	12	13.9761
300	12	13.9761

## Sheet: D3
					Temperature inside flux chamber, K	Volume of 1 mole of CO in standard conditions (0 deg C, 1 atm), L	Molecular weight of CO, g/mol	Emitting area enclosed by flux chamber (chamber footprint, A), m2	Volume of flux chamber (V), m3	dC/dt (slope)
					293	22.4	28	0.23	0.071	0.0488
Time (t), s	Measured concentration of CO, ppm	(C) measured CO concentration adjusted to standard conditions (0 deg C, 1 atm), mg/m3
0	0	0
5	0	0
10	0	0
15	0	0
20	0	0
25	0	0
30	0	0
35	0	0
40	1	1.16468
45	1	1.16468
50	1	1.16468
55	1	1.16468
60	2	2.32935
65	2	2.32935
70	2	2.32935
75	2	2.32935
80	3	3.49403
85	3	3.49403			Q=(V/A)*(dC/dt)			where: Q - CO flux, mg/m2/s
90	3	3.49403						V - flux chamber volume, m3
95	3	3.49403						A - flux chamber footprint, m2
100	3	3.49403			Q=	0.0150643	mg CO/m2/s	dC/dt - rate of change of CO concentration in the flux chamber with time (from the chart), mg/m3/s
105	3	3.49403				54.2317	mg CO/m2/h
110	3	3.49403
115	4	4.6587
120	4	4.6587
125	4	4.6587
130	4	4.6587
135	4	4.6587
140	4	4.6587
145	5	5.82338
150	5	5.82338
155	5	5.82338
160	6	6.98805
165	6	6.98805
170	6	6.98805
175	6	6.98805
180	6	6.98805
185	7	8.15273
190	7	8.15273
195	7	8.15273
200	8	9.31741
205	8	9.31741
210	8	9.31741
215	9	10.4821
220	9	10.4821
225	9	10.4821
230	9	10.4821
235	9	10.4821
240	10	11.6468
245	10	11.6468
250	10	11.6468
255	10	11.6468
260	10	11.6468
265	10	11.6468
270	10	11.6468
275	11	12.8114
280	11	12.8114
285	11	12.8114
290	11	12.8114
295	11	12.8114
300	11	12.8114

## Sheet: D4
					Temperature inside flux chamber, K	Volume of 1 mole of CO in standard conditions (0 deg C, 1 atm), L	Molecular weight of CO, g/mol	Emitting area enclosed by flux chamber (chamber footprint, A), m2	Volume of flux chamber (V), m3	dC/dt (slope)
					293	22.4	28	0.23	0.071	0.0338
Time (t), s	Measured concentration of CO, ppm	(C) measured CO concentration adjusted to standard conditions (0 deg C, 1 atm), mg/m3
0	0	0
5	0	0
10	0	0
15	0	0
20	0	0
25	1	1.16468
30	1	1.16468
35	1	1.16468
40	0	0
45	0	0
50	1	1.16468
55	1	1.16468
60	1	1.16468
65	1	1.16468
70	1	1.16468
75	1	1.16468
80	1	1.16468
85	1	1.16468			Q=(V/A)*(dC/dt)			where: Q - CO flux, mg/m2/s
90	2	2.32935						V - flux chamber volume, m3
95	2	2.32935						A - flux chamber footprint, m2
100	2	2.32935			Q=	0.0104339	mg CO/m2/s	dC/dt - rate of change of CO concentration in the flux chamber with time (from the chart), mg/m3/s
105	2	2.32935				37.5621	mg CO/m2/h
110	2	2.32935
115	3	3.49403
120	3	3.49403
125	3	3.49403
130	3	3.49403
135	3	3.49403
140	4	4.6587
145	4	4.6587
150	4	4.6587
155	4	4.6587
160	5	5.82338
165	5	5.82338
170	4	4.6587
175	4	4.6587
180	4	4.6587
185	4	4.6587
190	5	5.82338
195	5	5.82338
200	5	5.82338
205	5	5.82338
210	5	5.82338
215	5	5.82338
220	6	6.98805
225	6	6.98805
230	6	6.98805
235	6	6.98805
240	6	6.98805
245	7	8.15273
250	7	8.15273
255	7	8.15273
260	7	8.15273
265	7	8.15273
270	7	8.15273
275	8	9.31741
280	8	9.31741
285	8	9.31741
290	8	9.31741
295	8	9.31741
300	8	9.31741

## Sheet: D5
					Temperature inside flux chamber, K	Volume of 1 mole of CO in standard conditions (0 deg C, 1 atm), L	Molecular weight of CO, g/mol	Emitting area enclosed by flux chamber (chamber footprint, A), m2	Volume of flux chamber (V), m3	dC/dt (slope)
					293	22.4	28	0.23	0.071	0.0696
Time (t), s	Measured concentration of CO, ppm	(C) measured CO concentration adjusted to standard conditions (0 deg C, 1 atm), mg/m3
0	0	0
5	0	0
10	0	0
15	0	0
20	0	0
25	0	0
30	0	0
35	1	1.16468
40	1	1.16468
45	1	1.16468
50	1	1.16468
55	1	1.16468
60	2	2.32935
65	2	2.32935
70	2	2.32935
75	2	2.32935
80	2	2.32935
85	2	2.32935			Q=(V/A)*(dC/dt)			where: Q - CO flux, mg/m2/s
90	2	2.32935						V - flux chamber volume, m3
95	3	3.49403						A - flux chamber footprint, m2
100	3	3.49403			Q=	0.0214852	mg CO/m2/s	dC/dt - rate of change of CO concentration in the flux chamber with time (from the chart), mg/m3/s
105	3	3.49403				77.3468	mg CO/m2/h
110	3	3.49403
115	3	3.49403
120	3	3.49403
125	5	5.82338
130	5	5.82338
135	5	5.82338
140	6	6.98805
145	6	6.98805
150	6	6.98805
155	7	8.15273
160	7	8.15273
165	7	8.15273
170	8	9.31741
175	8	9.31741
180	9	10.4821
185	9	10.4821
190	9	10.4821
195	9	10.4821
200	11	12.8114
205	11	12.8114
210	11	12.8114
215	12	13.9761
220	12	13.9761
225	12	13.9761
230	13	15.1408
235	13	15.1408
240	13	15.1408
245	13	15.1408
250	14	16.3055
255	14	16.3055
260	14	16.3055
265	14	16.3055
270	15	17.4701
275	15	17.4701
280	15	17.4701
285	15	17.4701
290	15	17.4701
295	15	17.4701
300	15	17.4701

## Sheet: D6
					Temperature inside flux chamber, K	Volume of 1 mole of CO in standard conditions (0 deg C, 1 atm), L	Molecular weight of CO, g/mol	Emitting area enclosed by flux chamber (chamber footprint, A), m2	Volume of flux chamber (V), m3	dC/dt (slope)
					293	22.4	28	0.23	0.071	0.035
Time (t), s	Measured concentration of CO, ppm	(C) measured CO concentration adjusted to standard conditions (0 deg C, 1 atm), mg/m3
0	0	0
5	1	1.16468
10	1	1.16468
15	1	1.16468
20	1	1.16468
25	1	1.16468
30	1	1.16468
35	2	2.32935
40	2	2.32935
45	2	2.32935
50	2	2.32935
55	3	3.49403
60	3	3.49403
65	3	3.49403
70	3	3.49403
75	3	3.49403
80	3	3.49403
85	3	3.49403			Q=(V/A)*(dC/dt)			where: Q - CO flux, mg/m2/s
90	3	3.49403						V - flux chamber volume, m3
95	4	4.6587						A - flux chamber footprint, m2
100	4	4.6587			Q=	0.0108043	mg CO/m2/s	dC/dt - rate of change of CO concentration in the flux chamber with time (from the chart), mg/m3/s
105	4	4.6587				38.8957	mg CO/m2/h
110	4	4.6587
115	4	4.6587
120	4	4.6587
125	4	4.6587
130	4	4.6587
135	5	5.82338
140	5	5.82338
145	5	5.82338
150	5	5.82338
155	5	5.82338
160	5	5.82338
165	6	6.98805
170	6	6.98805
175	6	6.98805
180	6	6.98805
185	6	6.98805
190	7	8.15273
195	7	8.15273
200	7	8.15273
205	7	8.15273
210	7	8.15273
215	7	8.15273
220	7	8.15273
225	8	9.31741
230	8	9.31741
235	8	9.31741
240	8	9.31741
245	8	9.31741
250	8	9.31741
255	8	9.31741
260	9	10.4821
265	9	10.4821
270	9	10.4821
275	9	10.4821
280	9	10.4821
285	9	10.4821
290	9	10.4821
295	9	10.4821
300	9	10.4821

## Sheet: D7
					Temperature inside flux chamber, K	Volume of 1 mole of CO in standard conditions (0 deg C, 1 atm), L	Molecular weight of CO, g/mol	Emitting area enclosed by flux chamber (chamber footprint, A), m2	Volume of flux chamber (V), m3	dC/dt (slope)
					293	22.4	28	0.23	0.071	0.0199
Time (t), s	Measured concentration of CO, ppm	(C) measured CO concentration adjusted to standard conditions (0 deg C, 1 atm), mg/m3
0	0	0
5	0	0
10	0	0
15	0	0
20	0	0
25	0	0
30	0	0
35	0	0
40	0	0
45	0	0
50	0	0
55	0	0
60	0	0
65	0	0
70	0	0
75	0	0
80	1	1.16468
85	1	1.16468			Q=(V/A)*(dC/dt)			where: Q - CO flux, mg/m2/s
90	1	1.16468						V - flux chamber volume, m3
95	1	1.16468						A - flux chamber footprint, m2
100	1	1.16468			Q=	0.00614304	mg CO/m2/s	dC/dt - rate of change of CO concentration in the flux chamber with time (from the chart), mg/m3/s
105	1	1.16468				22.115	mg CO/m2/h
110	2	2.32935
115	2	2.32935
120	2	2.32935
125	2	2.32935
130	2	2.32935
135	2	2.32935
140	3	3.49403
145	3	3.49403
150	3	3.49403
155	3	3.49403
160	3	3.49403
165	3	3.49403
170	3	3.49403
175	3	3.49403
180	3	3.49403
185	4	4.6587
190	4	4.6587
195	4	4.6587
200	4	4.6587
205	3	3.49403
210	3	3.49403
215	3	3.49403
220	3	3.49403
225	3	3.49403
230	3	3.49403
235	4	4.6587
240	4	4.6587
245	4	4.6587
250	4	4.6587
255	4	4.6587
260	4	4.6587
265	4	4.6587
270	4	4.6587
275	4	4.6587
280	4	4.6587
285	4	4.6587
290	4	4.6587
295	4	4.6587
300	4	4.6587

## Sheet: D8
					Temperature inside flux chamber, K	Volume of 1 mole of CO in standard conditions (0 deg C, 1 atm), L	Molecular weight of CO, g/mol	Emitting area enclosed by flux chamber (chamber footprint, A), m2	Volume of flux chamber (V), m3	dC/dt (slope)
					293	22.4	28	0.23	0.071	0.0136
Time (t), s	Measured concentration of CO, ppm	(C) measured CO concentration adjusted to standard conditions (0 deg C, 1 atm), mg/m3
0	0	0
5	0	0
10	0	0
15	0	0
20	0	0
25	0	0
30	0	0
35	0	0
40	0	0
45	0	0
50	0	0
55	1	1.16468
60	1	1.16468
65	1	1.16468
70	1	1.16468
75	1	1.16468
80	1	1.16468
85	1	1.16468			Q=(V/A)*(dC/dt)			where: Q - CO flux, mg/m2/s
90	1	1.16468						V - flux chamber volume, m3
95	1	1.16468						A - flux chamber footprint, m2
100	1	1.16468			Q=	0.00419826	mg CO/m2/s	dC/dt - rate of change of CO concentration in the flux chamber with time (from the chart), mg/m3/s
105	2	2.32935				15.1137	mg CO/m2/h
110	2	2.32935
115	2	2.32935
120	2	2.32935
125	2	2.32935
130	2	2.32935
135	2	2.32935
140	2	2.32935
145	2	2.32935
150	2	2.32935
155	2	2.32935
160	2	2.32935
165	2	2.32935
170	2	2.32935
175	2	2.32935
180	2	2.32935
185	2	2.32935
190	2	2.32935
195	2	2.32935
200	2	2.32935
205	3	3.49403
210	3	3.49403
215	3	3.49403
220	3	3.49403
225	3	3.49403
230	3	3.49403
235	3	3.49403
240	3	3.49403
245	3	3.49403
250	3	3.49403
255	3	3.49403
260	3	3.49403
265	3	3.49403
270	3	3.49403
275	3	3.49403
280	3	3.49403
285	3	3.49403
290	3	3.49403
295	3	3.49403
300	3	3.49403

## Sheet: D9
					Temperature inside flux chamber, K	Volume of 1 mole of CO in standard conditions (0 deg C, 1 atm), L	Molecular weight of CO, g/mol	Emitting area enclosed by flux chamber (chamber footprint, A), m2	Volume of flux chamber (V), m3	dC/dt (slope)
					293	22.4	28	0.23	0.071	0.0158
Time (t), s	Measured concentration of CO, ppm	(C) measured CO concentration adjusted to standard conditions (0 deg C, 1 atm), mg/m3
0	0	0
5	0	0
10	0	0
15	0	0
20	0	0
25	0	0
30	0	0
35	1	1.16468
40	1	1.16468
45	1	1.16468
50	1	1.16468
55	1	1.16468
60	1	1.16468
65	1	1.16468
70	1	1.16468
75	1	1.16468
80	1	1.16468
85	1	1.16468			Q=(V/A)*(dC/dt)			where: Q - CO flux, mg/m2/s
90	1	1.16468						V - flux chamber volume, m3
95	1	1.16468						A - flux chamber footprint, m2
100	2	2.32935			Q=	0.00487739	mg CO/m2/s	dC/dt - rate of change of CO concentration in the flux chamber with time (from the chart), mg/m3/s
105	2	2.32935				17.5586	mg CO/m2/h
110	2	2.32935
115	2	2.32935
120	2	2.32935
125	2	2.32935
130	2	2.32935
135	2	2.32935
140	2	2.32935
145	2	2.32935
150	2	2.32935
155	2	2.32935
160	2	2.32935
165	2	2.32935
170	2	2.32935
175	2	2.32935
180	2	2.32935
185	2	2.32935
190	2	2.32935
195	3	3.49403
200	3	3.49403
205	3	3.49403
210	3	3.49403
215	3	3.49403
220	3	3.49403
225	3	3.49403
230	3	3.49403
235	3	3.49403
240	3	3.49403
245	3	3.49403
250	3	3.49403
255	4	4.6587
260	4	4.6587
265	4	4.6587
270	4	4.6587
275	4	4.6587
280	4	4.6587
285	4	4.6587
290	4	4.6587
295	4	4.6587
300	4	4.6587

## Sheet: Modelling
Modelling of CO emission				Notes
Surface of the pile (Ap)		300	m2
Time (t)		3600	s	Accumulation of CO in airtight hall during time (t)
Headspace volume in the hall		1000	m3	Assumption: the hall is airtight
Number of piles in the hall (n)		4	-
Emitted CO mass in time (t)		49727.2	mg	Estimated as a product of (averaged flux at D1-D9 locations), Ap, t, and n
		49.7272	g	Conversion from mg to g
Concentration of accumulated CO in the hall headspace during 1 hour, estimated for the 'before' turning scenario		49.7272	mg/m3
Molecular weight of CO		28	g/mol
Air temperature in the hall		20	deg C
Ambient pressure		1	atm
Volume of 1 mole of CO in standard conditions (0 deg C, 1 atm)		22.4	L
Concentration of accumulated CO in the hall headspace during 1 hour, estimated for the 'before' turning scenario		57.916	ppm
Concentration of accumulated CO in the hall headspace during 1 hour, estimated for the 'before' turning scenario		0.0057916	%
