# Supplementary material for: Assessment of Emissions and Potential Occupational Exposure to Carbon Monoxide during Biowaste Composting
Source: Preprints.org preprint supplement (doi:10.20944/preprints202306.1586.v1), 2023-06-22
Supplement: Supplementary file 22 [file Pile 3.1 after turning.xlsx]

## Sheet: D1
					Temperature inside flux chamber, K	Volume of 1 mole of CO in standard conditions (0 deg C, 1 atm), L	Molecular weight of CO, g/mol	Emitting area enclosed by flux chamber (chamber footprint, A), m2	Volume of flux chamber (V), m3	dC/dt (slope)
					293	22.4	28	0.23	0.071	0.0993
Time (t), s	Measured concentration of CO, ppm	(C) measured CO concentration adjusted to standard conditions (0 deg C, 1 atm), mg/m3
0	0	0
5	2	2.32935
10	2	2.32935
15	2	2.32935
20	3	3.49403
25	3	3.49403
30	3	3.49403
35	3	3.49403
40	4	4.6587
45	4	4.6587
50	4	4.6587
55	4	4.6587
60	6	6.98805
65	6	6.98805
70	6	6.98805
75	6	6.98805
80	6	6.98805
85	7	8.15273			Q=(V/A)*(dC/dt)			where: Q - CO flux, mg/m2/s
90	7	8.15273						V - flux chamber volume, m3
95	7	8.15273						A - flux chamber footprint, m2
100	8	9.31741			Q=	0.0306535	mg CO/m2/s	dC/dt - rate of change of CO concentration in the flux chamber with time (from the chart), mg/m3/s
105	8	9.31741				110.353	mg CO/m2/h
110	8	9.31741
115	10	11.6468
120	10	11.6468
125	10	11.6468
130	10	11.6468
135	10	11.6468
140	10	11.6468
145	10	11.6468
150	10	11.6468
155	11	12.8114
160	12	13.9761
165	13	15.1408
170	13	15.1408
175	15	17.4701
180	15	17.4701
185	16	18.6348
190	17	19.7995
195	17	19.7995
200	20	23.2935
205	20	23.2935
210	20	23.2935
215	21	24.4582
220	21	24.4582
225	21	24.4582
230	22	25.6229
235	22	25.6229
240	22	25.6229
245	22	25.6229
250	22	25.6229
255	23	26.7875
260	23	26.7875
265	23	26.7875
270	23	26.7875
275	23	26.7875
280	23	26.7875
285	23	26.7875
290	23	26.7875
295	23	26.7875
300	23	26.7875

## Sheet: D2
					Temperature inside flux chamber, K	Volume of 1 mole of CO in standard conditions (0 deg C, 1 atm), L	Molecular weight of CO, g/mol	Emitting area enclosed by flux chamber (chamber footprint, A), m2	Volume of flux chamber (V), m3	dC/dt (slope)
					293	22.4	28	0.23	0.071	0.1447
Time (t), s	Measured concentration of CO, ppm	(C) measured CO concentration adjusted to standard conditions (0 deg C, 1 atm), mg/m3
0	0	0
5	2	2.32935
10	2	2.32935
15	2	2.32935
20	3	3.49403
25	3	3.49403
30	3	3.49403
35	3	3.49403
40	4	4.6587
45	4	4.6587
50	4	4.6587
55	5	5.82338
60	5	5.82338
65	5	5.82338
70	6	6.98805
75	6	6.98805
80	9	10.4821
85	10	11.6468			Q=(V/A)*(dC/dt)			where: Q - CO flux, mg/m2/s
90	11	12.8114						V - flux chamber volume, m3
95	10	11.6468						A - flux chamber footprint, m2
100	10	11.6468			Q=	0.0446683	mg CO/m2/s	dC/dt - rate of change of CO concentration in the flux chamber with time (from the chart), mg/m3/s
105	10	11.6468				160.806	mg CO/m2/h
110	11	12.8114
115	13	15.1408
120	15	17.4701
125	15	17.4701
130	17	19.7995
135	18	20.9642
140	20	23.2935
145	22	25.6229
150	22	25.6229
155	23	26.7875
160	23	26.7875
165	23	26.7875
170	24	27.9522
175	24	27.9522
180	24	27.9522
185	25	29.1169
190	25	29.1169
195	26	30.2816
200	26	30.2816
205	27	31.4462
210	27	31.4462
215	28	32.6109
220	28	32.6109
225	29	33.7756
230	29	33.7756
235	30	34.9403
240	32	37.2696
245	32	37.2696
250	32	37.2696
255	32	37.2696
260	32	37.2696
265	32	37.2696
270	32	37.2696
275	32	37.2696
280	32	37.2696
285	32	37.2696
290	32	37.2696
295	32	37.2696
300	32	37.2696

## Sheet: D3
					Temperature inside flux chamber, K	Volume of 1 mole of CO in standard conditions (0 deg C, 1 atm), L	Molecular weight of CO, g/mol	Emitting area enclosed by flux chamber (chamber footprint, A), m2	Volume of flux chamber (V), m3	dC/dt (slope)
					293	22.4	28	0.23	0.071	0.0975
Time (t), s	Measured concentration of CO, ppm	(C) measured CO concentration adjusted to standard conditions (0 deg C, 1 atm), mg/m3
0	0	0
5	2	2.32935
10	2	2.32935
15	2	2.32935
20	2	2.32935
25	2	2.32935
30	2	2.32935
35	2	2.32935
40	2	2.32935
45	2	2.32935
50	2	2.32935
55	2	2.32935
60	3	3.49403
65	3	3.49403
70	3	3.49403
75	4	4.6587
80	4	4.6587
85	4	4.6587			Q=(V/A)*(dC/dt)			where: Q - CO flux, mg/m2/s
90	4	4.6587						V - flux chamber volume, m3
95	4	4.6587						A - flux chamber footprint, m2
100	4	4.6587			Q=	0.0300978	mg CO/m2/s	dC/dt - rate of change of CO concentration in the flux chamber with time (from the chart), mg/m3/s
105	5	5.82338				108.352	mg CO/m2/h
110	7	8.15273
115	8	9.31741
120	8	9.31741
125	9	10.4821
130	10	11.6468
135	10	11.6468
140	12	13.9761
145	12	13.9761
150	13	15.1408
155	13	15.1408
160	14	16.3055
165	14	16.3055
170	14	16.3055
175	15	17.4701
180	15	17.4701
185	16	18.6348
190	16	18.6348
195	17	19.7995
200	17	19.7995
205	17	19.7995
210	18	20.9642
215	18	20.9642
220	19	22.1288
225	19	22.1288
230	20	23.2935
235	20	23.2935
240	20	23.2935
245	21	24.4582
250	21	24.4582
255	21	24.4582
260	21	24.4582
265	21	24.4582
270	21	24.4582
275	21	24.4582
280	21	24.4582
285	21	24.4582
290	21	24.4582
295	21	24.4582
300	21	24.4582

## Sheet: D4
					Temperature inside flux chamber, K	Volume of 1 mole of CO in standard conditions (0 deg C, 1 atm), L	Molecular weight of CO, g/mol	Emitting area enclosed by flux chamber (chamber footprint, A), m2	Volume of flux chamber (V), m3	dC/dt (slope)
					293	22.4	28	0.23	0.071	0.0897
Time (t), s	Measured concentration of CO, ppm	(C) measured CO concentration adjusted to standard conditions (0 deg C, 1 atm), mg/m3
0	0	0
5	0	0
10	0	0
15	0	0
20	0	0
25	0	0
30	0	0
35	2	2.32935
40	2	2.32935
45	2	2.32935
50	3	3.49403
55	3	3.49403
60	3	3.49403
65	3	3.49403
70	3	3.49403
75	4	4.6587
80	4	4.6587
85	4	4.6587			Q=(V/A)*(dC/dt)			where: Q - CO flux, mg/m2/s
90	4	4.6587						V - flux chamber volume, m3
95	4	4.6587						A - flux chamber footprint, m2
100	4	4.6587			Q=	0.02769	mg CO/m2/s	dC/dt - rate of change of CO concentration in the flux chamber with time (from the chart), mg/m3/s
105	4	4.6587				99.684	mg CO/m2/h
110	6	6.98805
115	7	8.15273
120	8	9.31741
125	8	9.31741
130	9	10.4821
135	10	11.6468
140	10	11.6468
145	11	12.8114
150	11	12.8114
155	11	12.8114
160	12	13.9761
165	12	13.9761
170	12	13.9761
175	13	15.1408
180	13	15.1408
185	13	15.1408
190	15	17.4701
195	15	17.4701
200	16	18.6348
205	16	18.6348
210	16	18.6348
215	17	19.7995
220	17	19.7995
225	17	19.7995
230	17	19.7995
235	18	20.9642
240	18	20.9642
245	18	20.9642
250	18	20.9642
255	19	22.1288
260	19	22.1288
265	19	22.1288
270	19	22.1288
275	19	22.1288
280	19	22.1288
285	19	22.1288
290	19	22.1288
295	19	22.1288
300	19	22.1288

## Sheet: D5
					Temperature inside flux chamber, K	Volume of 1 mole of CO in standard conditions (0 deg C, 1 atm), L	Molecular weight of CO, g/mol	Emitting area enclosed by flux chamber (chamber footprint, A), m2	Volume of flux chamber (V), m3	dC/dt (slope)
					293	22.4	28	0.23	0.071	0.0426
Time (t), s	Measured concentration of CO, ppm	(C) measured CO concentration adjusted to standard conditions (0 deg C, 1 atm), mg/m3
0	0	0
5	2	2.32935
10	2	2.32935
15	2	2.32935
20	2	2.32935
25	2	2.32935
30	2	2.32935
35	2	2.32935
40	3	3.49403
45	3	3.49403
50	3	3.49403
55	3	3.49403
60	3	3.49403
65	3	3.49403
70	4	4.6587
75	4	4.6587
80	4	4.6587
85	4	4.6587			Q=(V/A)*(dC/dt)			where: Q - CO flux, mg/m2/s
90	4	4.6587						V - flux chamber volume, m3
95	4	4.6587						A - flux chamber footprint, m2
100	5	5.82338			Q=	0.0131504	mg CO/m2/s	dC/dt - rate of change of CO concentration in the flux chamber with time (from the chart), mg/m3/s
105	5	5.82338				47.3416	mg CO/m2/h
110	5	5.82338
115	5	5.82338
120	5	5.82338
125	6	6.98805
130	6	6.98805
135	6	6.98805
140	6	6.98805
145	7	8.15273
150	7	8.15273
155	7	8.15273
160	7	8.15273
165	7	8.15273
170	8	9.31741
175	8	9.31741
180	8	9.31741
185	8	9.31741
190	8	9.31741
195	9	10.4821
200	9	10.4821
205	9	10.4821
210	9	10.4821
215	9	10.4821
220	10	11.6468
225	10	11.6468
230	10	11.6468
235	10	11.6468
240	10	11.6468
245	10	11.6468
250	11	12.8114
255	11	12.8114
260	11	12.8114
265	11	12.8114
270	11	12.8114
275	11	12.8114
280	11	12.8114
285	11	12.8114
290	11	12.8114
295	11	12.8114
300	11	12.8114

## Sheet: D6
					Temperature inside flux chamber, K	Volume of 1 mole of CO in standard conditions (0 deg C, 1 atm), L	Molecular weight of CO, g/mol	Emitting area enclosed by flux chamber (chamber footprint, A), m2	Volume of flux chamber (V), m3	dC/dt (slope)
					293	22.4	28	0.23	0.071	0.0776
Time (t), s	Measured concentration of CO, ppm	(C) measured CO concentration adjusted to standard conditions (0 deg C, 1 atm), mg/m3
0	0	0
5	3	3.49403
10	3	3.49403
15	3	3.49403
20	3	3.49403
25	3	3.49403
30	3	3.49403
35	3	3.49403
40	3	3.49403
45	3	3.49403
50	3	3.49403
55	3	3.49403
60	6	6.98805
65	6	6.98805
70	6	6.98805
75	8	9.31741
80	8	9.31741
85	8	9.31741			Q=(V/A)*(dC/dt)			where: Q - CO flux, mg/m2/s
90	9	10.4821						V - flux chamber volume, m3
95	9	10.4821						A - flux chamber footprint, m2
100	9	10.4821			Q=	0.0239548	mg CO/m2/s	dC/dt - rate of change of CO concentration in the flux chamber with time (from the chart), mg/m3/s
105	10	11.6468				86.2372	mg CO/m2/h
110	11	12.8114
115	11	12.8114
120	12	13.9761
125	12	13.9761
130	12	13.9761
135	12	13.9761
140	13	15.1408
145	13	15.1408
150	13	15.1408
155	13	15.1408
160	13	15.1408
165	13	15.1408
170	14	16.3055
175	14	16.3055
180	14	16.3055
185	14	16.3055
190	14	16.3055
195	15	17.4701
200	15	17.4701
205	15	17.4701
210	15	17.4701
215	15	17.4701
220	15	17.4701
225	18	20.9642
230	18	20.9642
235	18	20.9642
240	18	20.9642
245	19	22.1288
250	19	22.1288
255	19	22.1288
260	20	23.2935
265	20	23.2935
270	20	23.2935
275	20	23.2935
280	20	23.2935
285	20	23.2935
290	20	23.2935
295	20	23.2935
300	20	23.2935

## Sheet: D7
					Temperature inside flux chamber, K	Volume of 1 mole of CO in standard conditions (0 deg C, 1 atm), L	Molecular weight of CO, g/mol	Emitting area enclosed by flux chamber (chamber footprint, A), m2	Volume of flux chamber (V), m3	dC/dt (slope)
					293	22.4	28	0.23	0.071	0.1081
Time (t), s	Measured concentration of CO, ppm	(C) measured CO concentration adjusted to standard conditions (0 deg C, 1 atm), mg/m3
0	0	0
5	2	2.32935
10	2	2.32935
15	2	2.32935
20	2	2.32935
25	3	3.49403
30	3	3.49403
35	3	3.49403
40	5	5.82338
45	5	5.82338
50	5	5.82338
55	6	6.98805
60	6	6.98805
65	7	8.15273
70	7	8.15273
75	8	9.31741
80	8	9.31741
85	9	10.4821			Q=(V/A)*(dC/dt)			where: Q - CO flux, mg/m2/s
90	9	10.4821						V - flux chamber volume, m3
95	10	11.6468						A - flux chamber footprint, m2
100	10	11.6468			Q=	0.03337	mg CO/m2/s	dC/dt - rate of change of CO concentration in the flux chamber with time (from the chart), mg/m3/s
105	10	11.6468				120.132	mg CO/m2/h
110	13	15.1408
115	14	16.3055
120	14	16.3055
125	14	16.3055
130	15	17.4701
135	15	17.4701
140	15	17.4701
145	17	19.7995
150	17	19.7995
155	17	19.7995
160	18	20.9642
165	18	20.9642
170	19	22.1288
175	19	22.1288
180	19	22.1288
185	20	23.2935
190	20	23.2935
195	20	23.2935
200	20	23.2935
205	22	25.6229
210	22	25.6229
215	22	25.6229
220	23	26.7875
225	23	26.7875
230	23	26.7875
235	23	26.7875
240	24	27.9522
245	24	27.9522
250	24	27.9522
255	24	27.9522
260	26	30.2816
265	26	30.2816
270	26	30.2816
275	26	30.2816
280	26	30.2816
285	26	30.2816
290	26	30.2816
295	26	30.2816
300	26	30.2816

## Sheet: D8
					Temperature inside flux chamber, K	Volume of 1 mole of CO in standard conditions (0 deg C, 1 atm), L	Molecular weight of CO, g/mol	Emitting area enclosed by flux chamber (chamber footprint, A), m2	Volume of flux chamber (V), m3	dC/dt (slope)
					293	22.4	28	0.23	0.071	0.0502
Time (t), s	Measured concentration of CO, ppm	(C) measured CO concentration adjusted to standard conditions (0 deg C, 1 atm), mg/m3
0	0	0
5	0	0
10	0	0
15	0	0
20	2	2.32935
25	2	2.32935
30	3	3.49403
35	3	3.49403
40	3	3.49403
45	3	3.49403
50	3	3.49403
55	3	3.49403
60	3	3.49403
65	3	3.49403
70	3	3.49403
75	4	4.6587
80	4	4.6587
85	4	4.6587			Q=(V/A)*(dC/dt)			where: Q - CO flux, mg/m2/s
90	5	5.82338						V - flux chamber volume, m3
95	5	5.82338						A - flux chamber footprint, m2
100	5	5.82338			Q=	0.0154965	mg CO/m2/s	dC/dt - rate of change of CO concentration in the flux chamber with time (from the chart), mg/m3/s
105	6	6.98805				55.7875	mg CO/m2/h
110	6	6.98805
115	6	6.98805
120	6	6.98805
125	6	6.98805
130	6	6.98805
135	7	8.15273
140	7	8.15273
145	7	8.15273
150	8	9.31741
155	8	9.31741
160	8	9.31741
165	8	9.31741
170	9	10.4821
175	9	10.4821
180	9	10.4821
185	9	10.4821
190	9	10.4821
195	10	11.6468
200	10	11.6468
205	10	11.6468
210	10	11.6468
215	10	11.6468
220	10	11.6468
225	12	13.9761
230	12	13.9761
235	12	13.9761
240	12	13.9761
245	12	13.9761
250	12	13.9761
255	12	13.9761
260	12	13.9761
265	12	13.9761
270	12	13.9761
275	12	13.9761
280	12	13.9761
285	12	13.9761
290	12	13.9761
295	12	13.9761
300	12	13.9761

## Sheet: D9
					Temperature inside flux chamber, K	Volume of 1 mole of CO in standard conditions (0 deg C, 1 atm), L	Molecular weight of CO, g/mol	Emitting area enclosed by flux chamber (chamber footprint, A), m2	Volume of flux chamber (V), m3	dC/dt (slope)
					293	22.4	28	0.23	0.071	0.0718
Time (t), s	Measured concentration of CO, ppm	(C) measured CO concentration adjusted to standard conditions (0 deg C, 1 atm), mg/m3
0	0	0
5	1	1.16468
10	1	1.16468
15	1	1.16468
20	1	1.16468
25	1	1.16468
30	1	1.16468
35	1	1.16468
40	2	2.32935
45	2	2.32935
50	2	2.32935
55	4	4.6587
60	4	4.6587
65	4	4.6587
70	5	5.82338
75	5	5.82338
80	5	5.82338
85	6	6.98805			Q=(V/A)*(dC/dt)			where: Q - CO flux, mg/m2/s
90	6	6.98805						V - flux chamber volume, m3
95	6	6.98805						A - flux chamber footprint, m2
100	6	6.98805			Q=	0.0221643	mg CO/m2/s	dC/dt - rate of change of CO concentration in the flux chamber with time (from the chart), mg/m3/s
105	7	8.15273				79.7917	mg CO/m2/h
110	7	8.15273
115	7	8.15273
120	8	9.31741
125	8	9.31741
130	8	9.31741
135	10	11.6468
140	10	11.6468
145	10	11.6468
150	11	12.8114
155	11	12.8114
160	11	12.8114
165	11	12.8114
170	12	13.9761
175	12	13.9761
180	12	13.9761
185	12	13.9761
190	14	16.3055
195	14	16.3055
200	14	16.3055
205	15	17.4701
210	15	17.4701
215	15	17.4701
220	15	17.4701
225	15	17.4701
230	16	18.6348
235	16	18.6348
240	16	18.6348
245	16	18.6348
250	16	18.6348
255	16	18.6348
260	16	18.6348
265	16	18.6348
270	16	18.6348
275	16	18.6348
280	16	18.6348
285	16	18.6348
290	16	18.6348
295	16	18.6348
300	16	18.6348

## Sheet: Modelling
Modelling of CO emission				Notes
Surface of the pile (Ap)		300	m2
Time (t)		3600	s	Accumulation of CO in airtight hall during time (t)
Headspace volume in the hall		1000	m3	Assumption: the hall is airtight
Number of piles in the hall (n)		4	-
Emitted CO mass in time (t)		115798	mg	Estimated as a product of (averaged flux at D1-D9 locations), Ap, t, and n
		115.798	g	Conversion from mg to g
Concentration of accumulated CO in the hall headspace during 1 hour, estimated for the 'after' turning scenario		115.798	mg/m3
Molecular weight of CO		28	g/mol
Air temperature in the hall		20	deg C
Ambient pressure		1	atm
Volume of 1 mole of CO in standard conditions (0 deg C, 1 atm)		22.4	L
Concentration of accumulated CO in the hall headspace during 1 hour, estimated for the 'after' turning scenario		134.867	ppm
Concentration of accumulated CO in the hall headspace during 1 hour, estimated for the 'after' turning scenario		0.0134867	%
