# Supplementary material for: Assessment of Emissions and Potential Occupational Exposure to Carbon Monoxide during Biowaste Composting
Source: Preprints.org preprint supplement (doi:10.20944/preprints202306.1586.v1), 2023-06-22
Supplement: Supplementary file 24 [file Pile 3.1 before turning.xlsx]

## Sheet: D1
					Temperature inside flux chamber, K	Volume of 1 mole of CO in standard conditions (0 deg C, 1 atm), L	Molecular weight of CO, g/mol	Emitting area enclosed by flux chamber (chamber footprint, A), m2	Volume of flux chamber (V), m3	dC/dt (slope)
					293	22.4	28	0.23	0.071	0.0251
Time (t), s	Measured concentration of CO, ppm	(C) measured CO concentration adjusted to standard conditions (0 deg C, 1 atm), mg/m3
0	0	0
5	0	0
10	0	0
15	0	0
20	1	1.16468
25	1	1.16468
30	1	1.16468
35	2	2.32935
40	2	2.32935
45	2	2.32935
50	3	3.49403
55	3	3.49403
60	3	3.49403
65	3	3.49403
70	3	3.49403
75	3	3.49403
80	3	3.49403
85	3	3.49403			Q=(V/A)*(dC/dt)			where: Q - CO flux, mg/m2/s
90	4	4.6587						V - flux chamber volume, m3
95	4	4.6587						A - flux chamber footprint, m2
100	4	4.6587			Q=	0.00774826	mg CO/m2/s	dC/dt - rate of change of CO concentration in the flux chamber with time (from the chart), mg/m3/s
105	4	4.6587				27.8937	mg CO/m2/h
110	4	4.6587
115	4	4.6587
120	4	4.6587
125	4	4.6587
130	4	4.6587
135	4	4.6587
140	4	4.6587
145	5	5.82338
150	5	5.82338
155	5	5.82338
160	5	5.82338
165	5	5.82338
170	5	5.82338
175	5	5.82338
180	5	5.82338
185	5	5.82338
190	5	5.82338
195	5	5.82338
200	5	5.82338
205	5	5.82338
210	5	5.82338
215	5	5.82338
220	6	6.98805
225	6	6.98805
230	6	6.98805
235	6	6.98805
240	6	6.98805
245	6	6.98805
250	6	6.98805
255	7	8.15273
260	7	8.15273
265	7	8.15273
270	7	8.15273
275	7	8.15273
280	7	8.15273
285	7	8.15273
290	7	8.15273
295	7	8.15273
300	7	8.15273

## Sheet: D2
					Temperature inside flux chamber, K	Volume of 1 mole of CO in standard conditions (0 deg C, 1 atm), L	Molecular weight of CO, g/mol	Emitting area enclosed by flux chamber (chamber footprint, A), m2	Volume of flux chamber (V), m3	dC/dt (slope)
					293	22.4	28	0.23	0.071	0.0299
Time (t), s	Measured concentration of CO, ppm	(C) measured CO concentration adjusted to standard conditions (0 deg C, 1 atm), mg/m3
0	0	0
5	1	1.16468
10	1	1.16468
15	1	1.16468
20	1	1.16468
25	2	2.32935
30	2	2.32935
35	2	2.32935
40	2	2.32935
45	2	2.32935
50	2	2.32935
55	2	2.32935
60	3	3.49403
65	3	3.49403
70	3	3.49403
75	3	3.49403
80	3	3.49403
85	4	4.6587			Q=(V/A)*(dC/dt)			where: Q - CO flux, mg/m2/s
90	4	4.6587						V - flux chamber volume, m3
95	4	4.6587						A - flux chamber footprint, m2
100	4	4.6587			Q=	0.00923	mg CO/m2/s	dC/dt - rate of change of CO concentration in the flux chamber with time (from the chart), mg/m3/s
105	4	4.6587				33.228	mg CO/m2/h
110	4	4.6587
115	4	4.6587
120	4	4.6587
125	4	4.6587
130	4	4.6587
135	4	4.6587
140	4	4.6587
145	4	4.6587
150	5	5.82338
155	5	5.82338
160	5	5.82338
165	5	5.82338
170	5	5.82338
175	5	5.82338
180	5	5.82338
185	5	5.82338
190	6	6.98805
195	6	6.98805
200	6	6.98805
205	6	6.98805
210	6	6.98805
215	6	6.98805
220	6	6.98805
225	6	6.98805
230	8	9.31741
235	8	9.31741
240	8	9.31741
245	8	9.31741
250	8	9.31741
255	8	9.31741
260	8	9.31741
265	8	9.31741
270	8	9.31741
275	8	9.31741
280	8	9.31741
285	8	9.31741
290	8	9.31741
295	8	9.31741
300	8	9.31741

## Sheet: D3
					Temperature inside flux chamber, K	Volume of 1 mole of CO in standard conditions (0 deg C, 1 atm), L	Molecular weight of CO, g/mol	Emitting area enclosed by flux chamber (chamber footprint, A), m2	Volume of flux chamber (V), m3	dC/dt (slope)
					293	22.4	28	0.23	0.071	0.0377
Time (t), s	Measured concentration of CO, ppm	(C) measured CO concentration adjusted to standard conditions (0 deg C, 1 atm), mg/m3
0	0	0
5	0	0
10	0	0
15	0	0
20	0	0
25	0	0
30	0	0
35	0	0
40	0	0
45	1	1.16468
50	1	1.16468
55	1	1.16468
60	1	1.16468
65	1	1.16468
70	1	1.16468
75	1	1.16468
80	1	1.16468
85	2	2.32935			Q=(V/A)*(dC/dt)			where: Q - CO flux, mg/m2/s
90	2	2.32935						V - flux chamber volume, m3
95	2	2.32935						A - flux chamber footprint, m2
100	2	2.32935			Q=	0.0116378	mg CO/m2/s	dC/dt - rate of change of CO concentration in the flux chamber with time (from the chart), mg/m3/s
105	2	2.32935				41.8962	mg CO/m2/h
110	2	2.32935
115	2	2.32935
120	3	3.49403
125	3	3.49403
130	3	3.49403
135	3	3.49403
140	3	3.49403
145	3	3.49403
150	4	4.6587
155	4	4.6587
160	4	4.6587
165	4	4.6587
170	5	5.82338
175	5	5.82338
180	5	5.82338
185	5	5.82338
190	5	5.82338
195	5	5.82338
200	6	6.98805
205	6	6.98805
210	6	6.98805
215	6	6.98805
220	7	8.15273
225	7	8.15273
230	7	8.15273
235	7	8.15273
240	7	8.15273
245	8	9.31741
250	8	9.31741
255	8	9.31741
260	8	9.31741
265	8	9.31741
270	8	9.31741
275	8	9.31741
280	8	9.31741
285	8	9.31741
290	8	9.31741
295	8	9.31741
300	8	9.31741

## Sheet: D4
					Temperature inside flux chamber, K	Volume of 1 mole of CO in standard conditions (0 deg C, 1 atm), L	Molecular weight of CO, g/mol	Emitting area enclosed by flux chamber (chamber footprint, A), m2	Volume of flux chamber (V), m3	dC/dt (slope)
					293	22.4	28	0.23	0.071	0.0388
Time (t), s	Measured concentration of CO, ppm	(C) measured CO concentration adjusted to standard conditions (0 deg C, 1 atm), mg/m3
0	0	0
5	0	0
10	0	0
15	0	0
20	0	0
25	0	0
30	0	0
35	0	0
40	2	2.32935
45	2	2.32935
50	2	2.32935
55	2	2.32935
60	2	2.32935
65	3	3.49403
70	3	3.49403
75	3	3.49403
80	3	3.49403
85	4	4.6587			Q=(V/A)*(dC/dt)			where: Q - CO flux, mg/m2/s
90	4	4.6587						V - flux chamber volume, m3
95	4	4.6587						A - flux chamber footprint, m2
100	4	4.6587			Q=	0.0119774	mg CO/m2/s	dC/dt - rate of change of CO concentration in the flux chamber with time (from the chart), mg/m3/s
105	5	5.82338				43.1186	mg CO/m2/h
110	5	5.82338
115	5	5.82338
120	6	6.98805
125	6	6.98805
130	7	8.15273
135	7	8.15273
140	7	8.15273
145	6	6.98805
150	6	6.98805
155	6	6.98805
160	7	8.15273
165	7	8.15273
170	6	6.98805
175	6	6.98805
180	6	6.98805
185	7	8.15273
190	7	8.15273
195	7	8.15273
200	8	9.31741
205	8	9.31741
210	8	9.31741
215	8	9.31741
220	8	9.31741
225	8	9.31741
230	8	9.31741
235	8	9.31741
240	9	10.4821
245	9	10.4821
250	9	10.4821
255	9	10.4821
260	9	10.4821
265	9	10.4821
270	9	10.4821
275	9	10.4821
280	9	10.4821
285	9	10.4821
290	9	10.4821
295	9	10.4821
300	9	10.4821

## Sheet: D5
					Temperature inside flux chamber, K	Volume of 1 mole of CO in standard conditions (0 deg C, 1 atm), L	Molecular weight of CO, g/mol	Emitting area enclosed by flux chamber (chamber footprint, A), m2	Volume of flux chamber (V), m3	dC/dt (slope)
					293	22.4	28	0.23	0.071	0.0333
Time (t), s	Measured concentration of CO, ppm	(C) measured CO concentration adjusted to standard conditions (0 deg C, 1 atm), mg/m3
0	0	0
5	0	0
10	0	0
15	0	0
20	0	0
25	0	0
30	0	0
35	0	0
40	1	1.16468
45	1	1.16468
50	1	1.16468
55	1	1.16468
60	1	1.16468
65	1	1.16468
70	2	2.32935
75	2	2.32935
80	2	2.32935
85	2	2.32935			Q=(V/A)*(dC/dt)			where: Q - CO flux, mg/m2/s
90	2	2.32935						V - flux chamber volume, m3
95	2	2.32935						A - flux chamber footprint, m2
100	2	2.32935			Q=	0.0102796	mg CO/m2/s	dC/dt - rate of change of CO concentration in the flux chamber with time (from the chart), mg/m3/s
105	4	4.6587				37.0064	mg CO/m2/h
110	4	4.6587
115	4	4.6587
120	4	4.6587
125	4	4.6587
130	5	5.82338
135	5	5.82338
140	6	6.98805
145	6	6.98805
150	6	6.98805
155	5	5.82338
160	5	5.82338
165	5	5.82338
170	4	4.6587
175	4	4.6587
180	4	4.6587
185	4	4.6587
190	6	6.98805
195	6	6.98805
200	6	6.98805
205	6	6.98805
210	6	6.98805
215	6	6.98805
220	6	6.98805
225	6	6.98805
230	6	6.98805
235	6	6.98805
240	6	6.98805
245	7	8.15273
250	7	8.15273
255	7	8.15273
260	7	8.15273
265	7	8.15273
270	7	8.15273
275	8	9.31741
280	8	9.31741
285	8	9.31741
290	8	9.31741
295	8	9.31741
300	8	9.31741

## Sheet: D6
					Temperature inside flux chamber, K	Volume of 1 mole of CO in standard conditions (0 deg C, 1 atm), L	Molecular weight of CO, g/mol	Emitting area enclosed by flux chamber (chamber footprint, A), m2	Volume of flux chamber (V), m3	dC/dt (slope)
					293	22.4	28	0.23	0.071	0.0285
Time (t), s	Measured concentration of CO, ppm	(C) measured CO concentration adjusted to standard conditions (0 deg C, 1 atm), mg/m3
0	0	0
5	1	1.16468
10	1	1.16468
15	1	1.16468
20	1	1.16468
25	1	1.16468
30	1	1.16468
35	1	1.16468
40	1	1.16468
45	2	2.32935
50	2	2.32935
55	2	2.32935
60	2	2.32935
65	2	2.32935
70	2	2.32935
75	3	3.49403
80	3	3.49403
85	3	3.49403			Q=(V/A)*(dC/dt)			where: Q - CO flux, mg/m2/s
90	3	3.49403						V - flux chamber volume, m3
95	3	3.49403						A - flux chamber footprint, m2
100	3	3.49403			Q=	0.00879783	mg CO/m2/s	dC/dt - rate of change of CO concentration in the flux chamber with time (from the chart), mg/m3/s
105	3	3.49403				31.6722	mg CO/m2/h
110	3	3.49403
115	5	5.82338
120	5	5.82338
125	5	5.82338
130	5	5.82338
135	5	5.82338
140	5	5.82338
145	5	5.82338
150	5	5.82338
155	5	5.82338
160	5	5.82338
165	5	5.82338
170	6	6.98805
175	6	6.98805
180	6	6.98805
185	6	6.98805
190	6	6.98805
195	6	6.98805
200	6	6.98805
205	6	6.98805
210	6	6.98805
215	6	6.98805
220	6	6.98805
225	6	6.98805
230	6	6.98805
235	6	6.98805
240	8	9.31741
245	8	9.31741
250	8	9.31741
255	7	8.15273
260	7	8.15273
265	7	8.15273
270	7	8.15273
275	7	8.15273
280	7	8.15273
285	7	8.15273
290	7	8.15273
295	7	8.15273
300	7	8.15273

## Sheet: D7
					Temperature inside flux chamber, K	Volume of 1 mole of CO in standard conditions (0 deg C, 1 atm), L	Molecular weight of CO, g/mol	Emitting area enclosed by flux chamber (chamber footprint, A), m2	Volume of flux chamber (V), m3	dC/dt (slope)
					293	22.4	28	0.23	0.071	0.0668
Time (t), s	Measured concentration of CO, ppm	(C) measured CO concentration adjusted to standard conditions (0 deg C, 1 atm), mg/m3
0	0	0
5	0	0
10	0	0
15	0	0
20	0	0
25	0	0
30	0	0
35	0	0
40	0	0
45	0	0
50	0	0
55	0	0
60	0	0
65	0	0
70	0	0
75	0	0
80	0	0
85	0	0			Q=(V/A)*(dC/dt)			where: Q - CO flux, mg/m2/s
90	0	0						V - flux chamber volume, m3
95	0	0						A - flux chamber footprint, m2
100	0	0			Q=	0.0206209	mg CO/m2/s	dC/dt - rate of change of CO concentration in the flux chamber with time (from the chart), mg/m3/s
105	0	0				74.2351	mg CO/m2/h
110	0	0
115	0	0
120	0	0
125	3	3.49403
130	3	3.49403
135	3	3.49403
140	3	3.49403
145	3	3.49403
150	3	3.49403
155	3	3.49403
160	4	4.6587
165	4	4.6587
170	4	4.6587
175	6	6.98805
180	6	6.98805
185	6	6.98805
190	6	6.98805
195	6	6.98805
200	6	6.98805
205	6	6.98805
210	8	9.31741
215	10	11.6468
220	10	11.6468
225	10	11.6468
230	10	11.6468
235	10	11.6468
240	13	15.1408
245	13	15.1408
250	13	15.1408
255	13	15.1408
260	12	13.9761
265	14	16.3055
270	14	16.3055
275	14	16.3055
280	14	16.3055
285	14	16.3055
290	14	16.3055
295	14	16.3055
300	14	16.3055

## Sheet: D8
					Temperature inside flux chamber, K	Volume of 1 mole of CO in standard conditions (0 deg C, 1 atm), L	Molecular weight of CO, g/mol	Emitting area enclosed by flux chamber (chamber footprint, A), m2	Volume of flux chamber (V), m3	dC/dt (slope)
					293	22.4	28	0.23	0.071	0.0351
Time (t), s	Measured concentration of CO, ppm	(C) measured CO concentration adjusted to standard conditions (0 deg C, 1 atm), mg/m3
0	0	0
5	0	0
10	0	0
15	0	0
20	0	0
25	1	1.16468
30	1	1.16468
35	1	1.16468
40	1	1.16468
45	1	1.16468
50	1	1.16468
55	1	1.16468
60	2	2.32935
65	2	2.32935
70	2	2.32935
75	3	3.49403
80	3	3.49403
85	3	3.49403			Q=(V/A)*(dC/dt)			where: Q - CO flux, mg/m2/s
90	3	3.49403						V - flux chamber volume, m3
95	4	4.6587						A - flux chamber footprint, m2
100	4	4.6587			Q=	0.0108352	mg CO/m2/s	dC/dt - rate of change of CO concentration in the flux chamber with time (from the chart), mg/m3/s
105	4	4.6587				39.0068	mg CO/m2/h
110	4	4.6587
115	4	4.6587
120	4	4.6587
125	5	5.82338
130	5	5.82338
135	5	5.82338
140	5	5.82338
145	5	5.82338
150	7	8.15273
155	7	8.15273
160	7	8.15273
165	7	8.15273
170	8	9.31741
175	8	9.31741
180	8	9.31741
185	8	9.31741
190	8	9.31741
195	9	10.4821
200	9	10.4821
205	9	10.4821
210	9	10.4821
215	9	10.4821
220	9	10.4821
225	8	9.31741
230	8	9.31741
235	8	9.31741
240	8	9.31741
245	8	9.31741
250	8	9.31741
255	8	9.31741
260	7	8.15273
265	7	8.15273
270	7	8.15273
275	7	8.15273
280	7	8.15273
285	7	8.15273
290	7	8.15273
295	7	8.15273
300	7	8.15273

## Sheet: D9
					Temperature inside flux chamber, K	Volume of 1 mole of CO in standard conditions (0 deg C, 1 atm), L	Molecular weight of CO, g/mol	Emitting area enclosed by flux chamber (chamber footprint, A), m2	Volume of flux chamber (V), m3	dC/dt (slope)
					293	22.4	28	0.23	0.071	0.0449
Time (t), s	Measured concentration of CO, ppm	(C) measured CO concentration adjusted to standard conditions (0 deg C, 1 atm), mg/m3
0	0	0
5	1	1.16468
10	1	1.16468
15	1	1.16468
20	1	1.16468
25	1	1.16468
30	1	1.16468
35	2	2.32935
40	2	2.32935
45	2	2.32935
50	2	2.32935
55	2	2.32935
60	2	2.32935
65	3	3.49403
70	3	3.49403
75	3	3.49403
80	3	3.49403
85	3	3.49403			Q=(V/A)*(dC/dt)			where: Q - CO flux, mg/m2/s
90	3	3.49403						V - flux chamber volume, m3
95	3	3.49403						A - flux chamber footprint, m2
100	4	4.6587			Q=	0.0138604	mg CO/m2/s	dC/dt - rate of change of CO concentration in the flux chamber with time (from the chart), mg/m3/s
105	4	4.6587				49.8976	mg CO/m2/h
110	4	4.6587
115	5	5.82338
120	5	5.82338
125	4	4.6587
130	4	4.6587
135	5	5.82338
140	5	5.82338
145	5	5.82338
150	5	5.82338
155	6	6.98805
160	6	6.98805
165	6	6.98805
170	6	6.98805
175	7	8.15273
180	7	8.15273
185	7	8.15273
190	7	8.15273
195	7	8.15273
200	8	9.31741
205	8	9.31741
210	9	10.4821
215	9	10.4821
220	9	10.4821
225	10	11.6468
230	10	11.6468
235	10	11.6468
240	9	10.4821
245	9	10.4821
250	9	10.4821
255	9	10.4821
260	11	12.8114
265	11	12.8114
270	11	12.8114
275	11	12.8114
280	11	12.8114
285	11	12.8114
290	11	12.8114
295	11	12.8114
300	11	12.8114

## Sheet: Modelling
Modelling of CO emission				Notes
Surface of the pile (Ap)		300	m2
Time (t)		3600	s	Accumulation of CO in airtight hall during time (t)
Headspace volume in the hall		1000	m3	Assumption: the hall is airtight
Number of piles in the hall (n)		4	-
Emitted CO mass in time (t)		50393.9	mg	Estimated as a product of (averaged flux at D1-D9 locations), Ap, t, and n
		50.3939	g	Conversion from mg to g
Concentration of accumulated CO in the hall headspace during 1 hour, estimated for the 'before' turning scenario		50.3939	mg/m3
Molecular weight of CO		28	g/mol
Air temperature in the hall		20	deg C
Ambient pressure		1	atm
Volume of 1 mole of CO in standard conditions (0 deg C, 1 atm)		22.4	L
Concentration of accumulated CO in the hall headspace during 1 hour, estimated for the 'before' turning scenario		58.6926	ppm
Concentration of accumulated CO in the hall headspace during 1 hour, estimated for the 'before' turning scenario		0.00586926	%
