# Supplementary material for: Assessment of Emissions and Potential Occupational Exposure to Carbon Monoxide during Biowaste Composting
Source: Preprints.org preprint supplement (doi:10.20944/preprints202306.1586.v1), 2023-06-22
Supplement: Supplementary file 26 [file Pile 3.2 after turning.xlsx]

## Sheet: D1
					Temperature inside flux chamber, K	Volume of 1 mole of CO in standard conditions (0 deg C, 1 atm), L	Molecular weight of CO, g/mol	Emitting area enclosed by flux chamber (chamber footprint, A), m2	Volume of flux chamber (V), m3	dC/dt (slope)
					293	22.4	28	0.23	0.071	0.0394
Time (t), s	Measured concentration of CO, ppm	(C) measured CO concentration adjusted to standard conditions (0 deg C, 1 atm), mg/m3
0	0	0
5	0	0
10	0	0
15	0	0
20	0	0
25	0	0
30	0	0
35	1	1.16468
40	1	1.16468
45	1	1.16468
50	1	1.16468
55	2	2.32935
60	2	2.32935
65	2	2.32935
70	3	3.49403
75	3	3.49403
80	3	3.49403
85	3	3.49403			Q=(V/A)*(dC/dt)			where: Q - CO flux, mg/m2/s
90	4	4.6587						V - flux chamber volume, m3
95	4	4.6587						A - flux chamber footprint, m2
100	4	4.6587			Q=	0.0121626	mg CO/m2/s	dC/dt - rate of change of CO concentration in the flux chamber with time (from the chart), mg/m3/s
105	4	4.6587				43.7854	mg CO/m2/h
110	5	5.82338
115	5	5.82338
120	5	5.82338
125	5	5.82338
130	5	5.82338
135	5	5.82338
140	6	6.98805
145	6	6.98805
150	6	6.98805
155	6	6.98805
160	6	6.98805
165	6	6.98805
170	6	6.98805
175	6	6.98805
180	6	6.98805
185	7	8.15273
190	7	8.15273
195	7	8.15273
200	7	8.15273
205	7	8.15273
210	7	8.15273
215	8	9.31741
220	8	9.31741
225	8	9.31741
230	8	9.31741
235	8	9.31741
240	8	9.31741
245	9	10.4821
250	9	10.4821
255	9	10.4821
260	9	10.4821
265	9	10.4821
270	9	10.4821
275	9	10.4821
280	9	10.4821
285	9	10.4821
290	9	10.4821
295	9	10.4821
300	9	10.4821

## Sheet: D2
					Temperature inside flux chamber, K	Volume of 1 mole of CO in standard conditions (0 deg C, 1 atm), L	Molecular weight of CO, g/mol	Emitting area enclosed by flux chamber (chamber footprint, A), m2	Volume of flux chamber (V), m3	dC/dt (slope)
					293	22.4	28	0.23	0.071	0.0331
Time (t), s	Measured concentration of CO, ppm	(C) measured CO concentration adjusted to standard conditions (0 deg C, 1 atm), mg/m3
0	0	0
5	0	0
10	0	0
15	0	0
20	0	0
25	0	0
30	0	0
35	0	0
40	0	0
45	0	0
50	0	0
55	0	0
60	0	0
65	0	0
70	0	0
75	0	0
80	0	0
85	1	1.16468			Q=(V/A)*(dC/dt)			where: Q - CO flux, mg/m2/s
90	1	1.16468						V - flux chamber volume, m3
95	1	1.16468						A - flux chamber footprint, m2
100	1	1.16468			Q=	0.0102178	mg CO/m2/s	dC/dt - rate of change of CO concentration in the flux chamber with time (from the chart), mg/m3/s
105	1	1.16468				36.7842	mg CO/m2/h
110	1	1.16468
115	1	1.16468
120	2	2.32935
125	2	2.32935
130	2	2.32935
135	2	2.32935
140	2	2.32935
145	2	2.32935
150	2	2.32935
155	3	3.49403
160	3	3.49403
165	3	3.49403
170	4	4.6587
175	4	4.6587
180	4	4.6587
185	4	4.6587
190	4	4.6587
195	4	4.6587
200	4	4.6587
205	5	5.82338
210	5	5.82338
215	5	5.82338
220	5	5.82338
225	5	5.82338
230	6	6.98805
235	6	6.98805
240	6	6.98805
245	6	6.98805
250	6	6.98805
255	6	6.98805
260	6	6.98805
265	6	6.98805
270	7	8.15273
275	7	8.15273
280	7	8.15273
285	7	8.15273
290	7	8.15273
295	7	8.15273
300	7	8.15273

## Sheet: D3
					Temperature inside flux chamber, K	Volume of 1 mole of CO in standard conditions (0 deg C, 1 atm), L	Molecular weight of CO, g/mol	Emitting area enclosed by flux chamber (chamber footprint, A), m2	Volume of flux chamber (V), m3	dC/dt (slope)
					293	22.4	28	0.23	0.071	0.0403
Time (t), s	Measured concentration of CO, ppm	(C) measured CO concentration adjusted to standard conditions (0 deg C, 1 atm), mg/m3
0	0	0
5	1	1.16468
10	1	1.16468
15	1	1.16468
20	2	2.32935
25	2	2.32935
30	2	2.32935
35	2	2.32935
40	4	4.6587
45	4	4.6587
50	4	4.6587
55	4	4.6587
60	5	5.82338
65	5	5.82338
70	5	5.82338
75	5	5.82338
80	5	5.82338
85	5	5.82338			Q=(V/A)*(dC/dt)			where: Q - CO flux, mg/m2/s
90	6	6.98805						V - flux chamber volume, m3
95	6	6.98805						A - flux chamber footprint, m2
100	6	6.98805			Q=	0.0124404	mg CO/m2/s	dC/dt - rate of change of CO concentration in the flux chamber with time (from the chart), mg/m3/s
105	6	6.98805				44.7856	mg CO/m2/h
110	6	6.98805
115	6	6.98805
120	6	6.98805
125	7	8.15273
130	7	8.15273
135	7	8.15273
140	7	8.15273
145	7	8.15273
150	8	9.31741
155	8	9.31741
160	8	9.31741
165	8	9.31741
170	8	9.31741
175	9	10.4821
180	9	10.4821
185	9	10.4821
190	9	10.4821
195	9	10.4821
200	9	10.4821
205	9	10.4821
210	10	11.6468
215	10	11.6468
220	10	11.6468
225	10	11.6468
230	10	11.6468
235	10	11.6468
240	10	11.6468
245	10	11.6468
250	10	11.6468
255	11	12.8114
260	11	12.8114
265	11	12.8114
270	11	12.8114
275	11	12.8114
280	11	12.8114
285	11	12.8114
290	11	12.8114
295	11	12.8114
300	11	12.8114

## Sheet: D4
					Temperature inside flux chamber, K	Volume of 1 mole of CO in standard conditions (0 deg C, 1 atm), L	Molecular weight of CO, g/mol	Emitting area enclosed by flux chamber (chamber footprint, A), m2	Volume of flux chamber (V), m3	dC/dt (slope)
					293	22.4	28	0.23	0.071	0.0554
Time (t), s	Measured concentration of CO, ppm	(C) measured CO concentration adjusted to standard conditions (0 deg C, 1 atm), mg/m3
0	0	0
5	3	3.49403
10	3	3.49403
15	4	4.6587
20	4	4.6587
25	4	4.6587
30	4	4.6587
35	5	5.82338
40	5	5.82338
45	5	5.82338
50	5	5.82338
55	6	6.98805
60	6	6.98805
65	6	6.98805
70	6	6.98805
75	7	8.15273
80	7	8.15273
85	7	8.15273			Q=(V/A)*(dC/dt)			where: Q - CO flux, mg/m2/s
90	7	8.15273						V - flux chamber volume, m3
95	7	8.15273						A - flux chamber footprint, m2
100	9	10.4821			Q=	0.0171017	mg CO/m2/s	dC/dt - rate of change of CO concentration in the flux chamber with time (from the chart), mg/m3/s
105	9	10.4821				61.5663	mg CO/m2/h
110	9	10.4821
115	9	10.4821
120	10	11.6468
125	10	11.6468
130	10	11.6468
135	10	11.6468
140	11	12.8114
145	11	12.8114
150	11	12.8114
155	11	12.8114
160	12	13.9761
165	12	13.9761
170	12	13.9761
175	12	13.9761
180	12	13.9761
185	12	13.9761
190	13	15.1408
195	13	15.1408
200	13	15.1408
205	13	15.1408
210	13	15.1408
215	14	16.3055
220	14	16.3055
225	14	16.3055
230	14	16.3055
235	14	16.3055
240	15	17.4701
245	15	17.4701
250	15	17.4701
255	15	17.4701
260	15	17.4701
265	15	17.4701
270	16	18.6348
275	16	18.6348
280	16	18.6348
285	16	18.6348
290	16	18.6348
295	16	18.6348
300	16	18.6348

## Sheet: D5
					Temperature inside flux chamber, K	Volume of 1 mole of CO in standard conditions (0 deg C, 1 atm), L	Molecular weight of CO, g/mol	Emitting area enclosed by flux chamber (chamber footprint, A), m2	Volume of flux chamber (V), m3	dC/dt (slope)
					293	22.4	28	0.23	0.071	0.0763
Time (t), s	Measured concentration of CO, ppm	(C) measured CO concentration adjusted to standard conditions (0 deg C, 1 atm), mg/m3
0	0	0
5	3	3.49403
10	3	3.49403
15	3	3.49403
20	3	3.49403
25	3	3.49403
30	3	3.49403
35	4	4.6587
40	4	4.6587
45	4	4.6587
50	5	5.82338
55	5	5.82338
60	5	5.82338
65	6	6.98805
70	6	6.98805
75	6	6.98805
80	7	8.15273
85	7	8.15273			Q=(V/A)*(dC/dt)			where: Q - CO flux, mg/m2/s
90	8	9.31741						V - flux chamber volume, m3
95	8	9.31741						A - flux chamber footprint, m2
100	8	9.31741			Q=	0.0235535	mg CO/m2/s	dC/dt - rate of change of CO concentration in the flux chamber with time (from the chart), mg/m3/s
105	11	12.8114				84.7925	mg CO/m2/h
110	11	12.8114
115	12	13.9761
120	12	13.9761
125	12	13.9761
130	13	15.1408
135	13	15.1408
140	13	15.1408
145	13	15.1408
150	14	16.3055
155	14	16.3055
160	14	16.3055
165	14	16.3055
170	14	16.3055
175	15	17.4701
180	15	17.4701
185	15	17.4701
190	15	17.4701
195	15	17.4701
200	16	18.6348
205	16	18.6348
210	16	18.6348
215	16	18.6348
220	17	19.7995
225	17	19.7995
230	17	19.7995
235	17	19.7995
240	18	20.9642
245	18	20.9642
250	18	20.9642
255	19	22.1288
260	19	22.1288
265	19	22.1288
270	19	22.1288
275	20	23.2935
280	20	23.2935
285	20	23.2935
290	20	23.2935
295	20	23.2935
300	20	23.2935

## Sheet: D6
					Temperature inside flux chamber, K	Volume of 1 mole of CO in standard conditions (0 deg C, 1 atm), L	Molecular weight of CO, g/mol	Emitting area enclosed by flux chamber (chamber footprint, A), m2	Volume of flux chamber (V), m3	dC/dt (slope)
					293	22.4	28	0.23	0.071	0.0602
Time (t), s	Measured concentration of CO, ppm	(C) measured CO concentration adjusted to standard conditions (0 deg C, 1 atm), mg/m3
0	0	0
5	1	1.16468
10	1	1.16468
15	1	1.16468
20	1	1.16468
25	1	1.16468
30	1	1.16468
35	2	2.32935
40	2	2.32935
45	2	2.32935
50	2	2.32935
55	2	2.32935
60	3	3.49403
65	3	3.49403
70	3	3.49403
75	4	4.6587
80	4	4.6587
85	4	4.6587			Q=(V/A)*(dC/dt)			where: Q - CO flux, mg/m2/s
90	5	5.82338						V - flux chamber volume, m3
95	5	5.82338						A - flux chamber footprint, m2
100	5	5.82338			Q=	0.0185835	mg CO/m2/s	dC/dt - rate of change of CO concentration in the flux chamber with time (from the chart), mg/m3/s
105	5	5.82338				66.9005	mg CO/m2/h
110	6	6.98805
115	6	6.98805
120	6	6.98805
125	6	6.98805
130	7	8.15273
135	7	8.15273
140	7	8.15273
145	8	9.31741
150	8	9.31741
155	8	9.31741
160	9	10.4821
165	9	10.4821
170	9	10.4821
175	10	11.6468
180	10	11.6468
185	10	11.6468
190	11	12.8114
195	11	12.8114
200	11	12.8114
205	11	12.8114
210	12	13.9761
215	12	13.9761
220	12	13.9761
225	12	13.9761
230	12	13.9761
235	13	15.1408
240	13	15.1408
245	13	15.1408
250	13	15.1408
255	13	15.1408
260	13	15.1408
265	14	16.3055
270	14	16.3055
275	14	16.3055
280	14	16.3055
285	14	16.3055
290	14	16.3055
295	14	16.3055
300	14	16.3055

## Sheet: D7
					Temperature inside flux chamber, K	Volume of 1 mole of CO in standard conditions (0 deg C, 1 atm), L	Molecular weight of CO, g/mol	Emitting area enclosed by flux chamber (chamber footprint, A), m2	Volume of flux chamber (V), m3	dC/dt (slope)
					293	22.4	28	0.23	0.071	0.0755
Time (t), s	Measured concentration of CO, ppm	(C) measured CO concentration adjusted to standard conditions (0 deg C, 1 atm), mg/m3
0	0	0
5	3	3.49403
10	3	3.49403
15	3	3.49403
20	3	3.49403
25	3	3.49403
30	3	3.49403
35	3	3.49403
40	3	3.49403
45	4	4.6587
50	4	4.6587
55	4	4.6587
60	4	4.6587
65	7	8.15273
70	7	8.15273
75	8	9.31741
80	8	9.31741
85	8	9.31741			Q=(V/A)*(dC/dt)			where: Q - CO flux, mg/m2/s
90	10	11.6468						V - flux chamber volume, m3
95	10	11.6468						A - flux chamber footprint, m2
100	10	11.6468			Q=	0.0233065	mg CO/m2/s	dC/dt - rate of change of CO concentration in the flux chamber with time (from the chart), mg/m3/s
105	11	12.8114				83.9035	mg CO/m2/h
110	11	12.8114
115	11	12.8114
120	12	13.9761
125	12	13.9761
130	12	13.9761
135	12	13.9761
140	13	15.1408
145	13	15.1408
150	13	15.1408
155	13	15.1408
160	13	15.1408
165	14	16.3055
170	14	16.3055
175	14	16.3055
180	14	16.3055
185	15	17.4701
190	15	17.4701
195	15	17.4701
200	16	18.6348
205	16	18.6348
210	16	18.6348
215	16	18.6348
220	17	19.7995
225	17	19.7995
230	17	19.7995
235	18	20.9642
240	18	20.9642
245	18	20.9642
250	18	20.9642
255	18	20.9642
260	19	22.1288
265	19	22.1288
270	19	22.1288
275	20	23.2935
280	20	23.2935
285	20	23.2935
290	20	23.2935
295	20	23.2935
300	20	23.2935

## Sheet: D8
					Temperature inside flux chamber, K	Volume of 1 mole of CO in standard conditions (0 deg C, 1 atm), L	Molecular weight of CO, g/mol	Emitting area enclosed by flux chamber (chamber footprint, A), m2	Volume of flux chamber (V), m3	dC/dt (slope)
					293	22.4	28	0.23	0.071	0.082
Time (t), s	Measured concentration of CO, ppm	(C) measured CO concentration adjusted to standard conditions (0 deg C, 1 atm), mg/m3
0	0	0
5	5	5.82338
10	5	5.82338
15	5	5.82338
20	6	6.98805
25	6	6.98805
30	6	6.98805
35	8	9.31741
40	8	9.31741
45	9	10.4821
50	9	10.4821
55	9	10.4821
60	10	11.6468
65	10	11.6468
70	10	11.6468
75	11	12.8114
80	11	12.8114
85	11	12.8114			Q=(V/A)*(dC/dt)			where: Q - CO flux, mg/m2/s
90	12	13.9761						V - flux chamber volume, m3
95	12	13.9761						A - flux chamber footprint, m2
100	12	13.9761			Q=	0.025313	mg CO/m2/s	dC/dt - rate of change of CO concentration in the flux chamber with time (from the chart), mg/m3/s
105	12	13.9761				91.127	mg CO/m2/h
110	13	15.1408
115	13	15.1408
120	13	15.1408
125	15	17.4701
130	15	17.4701
135	16	18.6348
140	16	18.6348
145	16	18.6348
150	16	18.6348
155	17	19.7995
160	17	19.7995
165	17	19.7995
170	18	20.9642
175	18	20.9642
180	18	20.9642
185	19	22.1288
190	19	22.1288
195	19	22.1288
200	19	22.1288
205	20	23.2935
210	20	23.2935
215	20	23.2935
220	21	24.4582
225	21	24.4582
230	21	24.4582
235	22	25.6229
240	22	25.6229
245	23	26.7875
250	23	26.7875
255	23	26.7875
260	23	26.7875
265	23	26.7875
270	24	27.9522
275	24	27.9522
280	24	27.9522
285	24	27.9522
290	24	27.9522
295	24	27.9522
300	24	27.9522

## Sheet: D9
					Temperature inside flux chamber, K	Volume of 1 mole of CO in standard conditions (0 deg C, 1 atm), L	Molecular weight of CO, g/mol	Emitting area enclosed by flux chamber (chamber footprint, A), m2	Volume of flux chamber (V), m3	dC/dt (slope)
					293	22.4	28	0.23	0.071	0.0621
Time (t), s	Measured concentration of CO, ppm	(C) measured CO concentration adjusted to standard conditions (0 deg C, 1 atm), mg/m3
0	0	0
5	2	2.32935
10	2	2.32935
15	2	2.32935
20	2	2.32935
25	3	3.49403
30	3	3.49403
35	3	3.49403
40	3	3.49403
45	3	3.49403
50	5	5.82338
55	5	5.82338
60	5	5.82338
65	7	8.15273
70	7	8.15273
75	8	9.31741
80	8	9.31741
85	8	9.31741			Q=(V/A)*(dC/dt)			where: Q - CO flux, mg/m2/s
90	10	11.6468						V - flux chamber volume, m3
95	10	11.6468						A - flux chamber footprint, m2
100	10	11.6468			Q=	0.01917	mg CO/m2/s	dC/dt - rate of change of CO concentration in the flux chamber with time (from the chart), mg/m3/s
105	11	12.8114				69.012	mg CO/m2/h
110	11	12.8114
115	11	12.8114
120	11	12.8114
125	11	12.8114
130	12	13.9761
135	12	13.9761
140	12	13.9761
145	12	13.9761
150	12	13.9761
155	12	13.9761
160	13	15.1408
165	13	15.1408
170	13	15.1408
175	13	15.1408
180	13	15.1408
185	13	15.1408
190	14	16.3055
195	14	16.3055
200	14	16.3055
205	14	16.3055
210	14	16.3055
215	14	16.3055
220	15	17.4701
225	15	17.4701
230	15	17.4701
235	15	17.4701
240	15	17.4701
245	15	17.4701
250	16	18.6348
255	16	18.6348
260	16	18.6348
265	16	18.6348
270	16	18.6348
275	17	19.7995
280	17	19.7995
285	17	19.7995
290	17	19.7995
295	17	19.7995
300	17	19.7995

## Sheet: Modelling
Modelling of CO emission				Notes
Surface of the pile (Ap)		300	m2
Time (t)		3600	s	Accumulation of CO in airtight hall during time (t)
Headspace volume in the hall		1000	m3	Assumption: the hall is airtight
Number of piles in the hall (n)		4	-
Emitted CO mass in time (t)		77687.6	mg	Estimated as a product of (averaged flux at D1-D9 locations), Ap, t, and n
		77.6876	g	Conversion from mg to g
Concentration of accumulated CO in the hall headspace during 1 hour, estimated for the 'after' turning scenario		77.6876	mg/m3
Molecular weight of CO		28	g/mol
Air temperature in the hall		20	deg C
Ambient pressure		1	atm
Volume of 1 mole of CO in standard conditions (0 deg C, 1 atm)		22.4	L
Concentration of accumulated CO in the hall headspace during 1 hour, estimated for the 'after' turning scenario		90.4808	ppm
Concentration of accumulated CO in the hall headspace during 1 hour, estimated for the 'after' turning scenario		0.00904808	%
