# Supplementary material for: Assessment of Emissions and Potential Occupational Exposure to Carbon Monoxide during Biowaste Composting
Source: Preprints.org preprint supplement (doi:10.20944/preprints202306.1586.v1), 2023-06-22
Supplement: Supplementary file 30 [file Pile 3.3 after turning.xlsx]

## Sheet: D1
					Temperature inside flux chamber, K	Volume of 1 mole of CO in standard conditions (0 deg C, 1 atm), L	Molecular weight of CO, g/mol	Emitting area enclosed by flux chamber (chamber footprint, A), m2	Volume of flux chamber (V), m3	dC/dt (slope)
					293	22.4	28	0.23	0.071	0.0138
Time (t), s	Measured concentration of CO, ppm	(C) measured CO concentration adjusted to standard conditions (0 deg C, 1 atm), mg/m3
0	0	0
5	0	0
10	0	0
15	0	0
20	0	0
25	0	0
30	0	0
35	0	0
40	0	0
45	0	0
50	0	0
55	0	0
60	0	0
65	0	0
70	2	2.32935
75	2	2.32935
80	2	2.32935
85	2	2.32935			Q=(V/A)*(dC/dt)			where: Q - CO flux, mg/m2/s
90	2	2.32935						V - flux chamber volume, m3
95	2	2.32935						A - flux chamber footprint, m2
100	2	2.32935			Q=	0.00426	mg CO/m2/s	dC/dt - rate of change of CO concentration in the flux chamber with time (from the chart), mg/m3/s
105	2	2.32935				15.336	mg CO/m2/h
110	2	2.32935
115	2	2.32935
120	2	2.32935
125	2	2.32935
130	2	2.32935
135	2	2.32935
140	3	3.49403
145	3	3.49403
150	3	3.49403
155	3	3.49403
160	3	3.49403
165	3	3.49403
170	3	3.49403
175	3	3.49403
180	3	3.49403
185	3	3.49403
190	3	3.49403
195	3	3.49403
200	3	3.49403
205	3	3.49403
210	3	3.49403
215	3	3.49403
220	3	3.49403
225	3	3.49403
230	3	3.49403
235	3	3.49403
240	3	3.49403
245	3	3.49403
250	3	3.49403
255	3	3.49403
260	3	3.49403
265	3	3.49403
270	3	3.49403
275	3	3.49403
280	3	3.49403
285	3	3.49403
290	3	3.49403
295	3	3.49403
300	3	3.49403

## Sheet: D2
					Temperature inside flux chamber, K	Volume of 1 mole of CO in standard conditions (0 deg C, 1 atm), L	Molecular weight of CO, g/mol	Emitting area enclosed by flux chamber (chamber footprint, A), m2	Volume of flux chamber (V), m3	dC/dt (slope)
					293	22.4	28	0.23	0.071	0.0119
Time (t), s	Measured concentration of CO, ppm	(C) measured CO concentration adjusted to standard conditions (0 deg C, 1 atm), mg/m3
0	0	0
5	0	0
10	0	0
15	0	0
20	0	0
25	0	0
30	0	0
35	0	0
40	0	0
45	0	0
50	0	0
55	0	0
60	0	0
65	0	0
70	0	0
75	0	0
80	0	0
85	0	0			Q=(V/A)*(dC/dt)			where: Q - CO flux, mg/m2/s
90	0	0						V - flux chamber volume, m3
95	0	0						A - flux chamber footprint, m2
100	0	0			Q=	0.00367348	mg CO/m2/s	dC/dt - rate of change of CO concentration in the flux chamber with time (from the chart), mg/m3/s
105	0	0				13.2245	mg CO/m2/h
110	0	0
115	1	1.16468
120	1	1.16468
125	1	1.16468
130	1	1.16468
135	1	1.16468
140	1	1.16468
145	1	1.16468
150	1	1.16468
155	1	1.16468
160	1	1.16468
165	1	1.16468
170	1	1.16468
175	1	1.16468
180	1	1.16468
185	1	1.16468
190	1	1.16468
195	1	1.16468
200	1	1.16468
205	1	1.16468
210	1	1.16468
215	1	1.16468
220	1	1.16468
225	2	2.32935
230	2	2.32935
235	2	2.32935
240	2	2.32935
245	2	2.32935
250	2	2.32935
255	2	2.32935
260	2	2.32935
265	2	2.32935
270	2	2.32935
275	3	3.49403
280	3	3.49403
285	3	3.49403
290	3	3.49403
295	3	3.49403
300	3	3.49403

## Sheet: D3
					Temperature inside flux chamber, K	Volume of 1 mole of CO in standard conditions (0 deg C, 1 atm), L	Molecular weight of CO, g/mol	Emitting area enclosed by flux chamber (chamber footprint, A), m2	Volume of flux chamber (V), m3	dC/dt (slope)
					293	22.4	28	0.23	0.071	0.0147
Time (t), s	Measured concentration of CO, ppm	(C) measured CO concentration adjusted to standard conditions (0 deg C, 1 atm), mg/m3
0	0	0
5	0	0
10	0	0
15	0	0
20	0	0
25	0	0
30	0	0
35	0	0
40	0	0
45	0	0
50	0	0
55	0	0
60	0	0
65	0	0
70	0	0
75	0	0
80	0	0
85	0	0			Q=(V/A)*(dC/dt)			where: Q - CO flux, mg/m2/s
90	0	0						V - flux chamber volume, m3
95	0	0						A - flux chamber footprint, m2
100	0	0			Q=	0.00453783	mg CO/m2/s	dC/dt - rate of change of CO concentration in the flux chamber with time (from the chart), mg/m3/s
105	0	0				16.3362	mg CO/m2/h
110	0	0
115	1	1.16468
120	1	1.16468
125	1	1.16468
130	1	1.16468
135	1	1.16468
140	1	1.16468
145	1	1.16468
150	1	1.16468
155	1	1.16468
160	1	1.16468
165	1	1.16468
170	1	1.16468
175	1	1.16468
180	1	1.16468
185	2	2.32935
190	2	2.32935
195	2	2.32935
200	2	2.32935
205	2	2.32935
210	2	2.32935
215	2	2.32935
220	2	2.32935
225	2	2.32935
230	2	2.32935
235	2	2.32935
240	3	3.49403
245	3	3.49403
250	3	3.49403
255	3	3.49403
260	3	3.49403
265	3	3.49403
270	3	3.49403
275	3	3.49403
280	3	3.49403
285	3	3.49403
290	3	3.49403
295	3	3.49403
300	3	3.49403

## Sheet: D4
					Temperature inside flux chamber, K	Volume of 1 mole of CO in standard conditions (0 deg C, 1 atm), L	Molecular weight of CO, g/mol	Emitting area enclosed by flux chamber (chamber footprint, A), m2	Volume of flux chamber (V), m3	dC/dt (slope)
					293	22.4	28	0.23	0.071	0.0439
Time (t), s	Measured concentration of CO, ppm	(C) measured CO concentration adjusted to standard conditions (0 deg C, 1 atm), mg/m3
0	0	0
5	2	2.32935
10	2	2.32935
15	2	2.32935
20	2	2.32935
25	2	2.32935
30	2	2.32935
35	2	2.32935
40	3	3.49403
45	3	3.49403
50	3	3.49403
55	3	3.49403
60	4	4.6587
65	4	4.6587
70	4	4.6587
75	4	4.6587
80	4	4.6587
85	5	5.82338			Q=(V/A)*(dC/dt)			where: Q - CO flux, mg/m2/s
90	5	5.82338						V - flux chamber volume, m3
95	5	5.82338						A - flux chamber footprint, m2
100	5	5.82338			Q=	0.0135517	mg CO/m2/s	dC/dt - rate of change of CO concentration in the flux chamber with time (from the chart), mg/m3/s
105	6	6.98805				48.7863	mg CO/m2/h
110	6	6.98805
115	6	6.98805
120	6	6.98805
125	6	6.98805
130	7	8.15273
135	7	8.15273
140	7	8.15273
145	7	8.15273
150	8	9.31741
155	8	9.31741
160	8	9.31741
165	8	9.31741
170	9	10.4821
175	9	10.4821
180	9	10.4821
185	9	10.4821
190	10	11.6468
195	10	11.6468
200	10	11.6468
205	10	11.6468
210	10	11.6468
215	11	12.8114
220	11	12.8114
225	11	12.8114
230	11	12.8114
235	11	12.8114
240	11	12.8114
245	11	12.8114
250	11	12.8114
255	11	12.8114
260	11	12.8114
265	11	12.8114
270	11	12.8114
275	11	12.8114
280	11	12.8114
285	11	12.8114
290	11	12.8114
295	11	12.8114
300	11	12.8114

## Sheet: D5
					Temperature inside flux chamber, K	Volume of 1 mole of CO in standard conditions (0 deg C, 1 atm), L	Molecular weight of CO, g/mol	Emitting area enclosed by flux chamber (chamber footprint, A), m2	Volume of flux chamber (V), m3	dC/dt (slope)
					293	22.4	28	0.23	0.071	0.0654
Time (t), s	Measured concentration of CO, ppm	(C) measured CO concentration adjusted to standard conditions (0 deg C, 1 atm), mg/m3
0	0	0
5	4	4.6587
10	4	4.6587
15	4	4.6587
20	4	4.6587
25	4	4.6587
30	4	4.6587
35	4	4.6587
40	4	4.6587
45	5	5.82338
50	5	5.82338
55	5	5.82338
60	6	6.98805
65	6	6.98805
70	6	6.98805
75	6	6.98805
80	7	8.15273
85	7	8.15273			Q=(V/A)*(dC/dt)			where: Q - CO flux, mg/m2/s
90	7	8.15273						V - flux chamber volume, m3
95	8	9.31741						A - flux chamber footprint, m2
100	8	9.31741			Q=	0.0201887	mg CO/m2/s	dC/dt - rate of change of CO concentration in the flux chamber with time (from the chart), mg/m3/s
105	8	9.31741				72.6793	mg CO/m2/h
110	9	10.4821
115	9	10.4821
120	9	10.4821
125	10	11.6468
130	10	11.6468
135	10	11.6468
140	11	12.8114
145	11	12.8114
150	11	12.8114
155	12	13.9761
160	12	13.9761
165	12	13.9761
170	12	13.9761
175	13	15.1408
180	13	15.1408
185	13	15.1408
190	13	15.1408
195	13	15.1408
200	15	17.4701
205	15	17.4701
210	15	17.4701
215	15	17.4701
220	15	17.4701
225	16	18.6348
230	16	18.6348
235	16	18.6348
240	16	18.6348
245	16	18.6348
250	17	19.7995
255	17	19.7995
260	17	19.7995
265	17	19.7995
270	17	19.7995
275	18	20.9642
280	18	20.9642
285	18	20.9642
290	18	20.9642
295	18	20.9642
300	18	20.9642

## Sheet: D6
					Temperature inside flux chamber, K	Volume of 1 mole of CO in standard conditions (0 deg C, 1 atm), L	Molecular weight of CO, g/mol	Emitting area enclosed by flux chamber (chamber footprint, A), m2	Volume of flux chamber (V), m3	dC/dt (slope)
					293	22.4	28	0.23	0.071	0.0492
Time (t), s	Measured concentration of CO, ppm	(C) measured CO concentration adjusted to standard conditions (0 deg C, 1 atm), mg/m3
0	0	0
5	2	2.32935
10	2	2.32935
15	2	2.32935
20	3	3.49403
25	3	3.49403
30	3	3.49403
35	4	4.6587
40	4	4.6587
45	4	4.6587
50	5	5.82338
55	5	5.82338
60	5	5.82338
65	5	5.82338
70	5	5.82338
75	7	8.15273
80	7	8.15273
85	7	8.15273			Q=(V/A)*(dC/dt)			where: Q - CO flux, mg/m2/s
90	7	8.15273						V - flux chamber volume, m3
95	8	9.31741						A - flux chamber footprint, m2
100	8	9.31741			Q=	0.0151878	mg CO/m2/s	dC/dt - rate of change of CO concentration in the flux chamber with time (from the chart), mg/m3/s
105	8	9.31741				54.6762	mg CO/m2/h
110	8	9.31741
115	9	10.4821
120	9	10.4821
125	9	10.4821
130	9	10.4821
135	9	10.4821
140	9	10.4821
145	10	11.6468
150	10	11.6468
155	10	11.6468
160	10	11.6468
165	10	11.6468
170	11	12.8114
175	11	12.8114
180	11	12.8114
185	11	12.8114
190	11	12.8114
195	11	12.8114
200	11	12.8114
205	12	13.9761
210	12	13.9761
215	12	13.9761
220	12	13.9761
225	12	13.9761
230	12	13.9761
235	13	15.1408
240	13	15.1408
245	13	15.1408
250	13	15.1408
255	13	15.1408
260	13	15.1408
265	13	15.1408
270	14	16.3055
275	14	16.3055
280	14	16.3055
285	14	16.3055
290	14	16.3055
295	14	16.3055
300	14	16.3055

## Sheet: D7
					Temperature inside flux chamber, K	Volume of 1 mole of CO in standard conditions (0 deg C, 1 atm), L	Molecular weight of CO, g/mol	Emitting area enclosed by flux chamber (chamber footprint, A), m2	Volume of flux chamber (V), m3	dC/dt (slope)
					293	22.4	28	0.23	0.071	0.0703
Time (t), s	Measured concentration of CO, ppm	(C) measured CO concentration adjusted to standard conditions (0 deg C, 1 atm), mg/m3
0	0	0
5	2	2.32935
10	2	2.32935
15	2	2.32935
20	2	2.32935
25	3	3.49403
30	3	3.49403
35	3	3.49403
40	3	3.49403
45	3	3.49403
50	3	3.49403
55	3	3.49403
60	3	3.49403
65	4	4.6587
70	4	4.6587
75	4	4.6587
80	4	4.6587
85	4	4.6587			Q=(V/A)*(dC/dt)			where: Q - CO flux, mg/m2/s
90	4	4.6587						V - flux chamber volume, m3
95	4	4.6587						A - flux chamber footprint, m2
100	4	4.6587			Q=	0.0217013	mg CO/m2/s	dC/dt - rate of change of CO concentration in the flux chamber with time (from the chart), mg/m3/s
105	5	5.82338				78.1247	mg CO/m2/h
110	5	5.82338
115	5	5.82338
120	5	5.82338
125	5	5.82338
130	5	5.82338
135	8	9.31741
140	8	9.31741
145	8	9.31741
150	8	9.31741
155	9	10.4821
160	9	10.4821
165	9	10.4821
170	10	11.6468
175	10	11.6468
180	11	12.8114
185	11	12.8114
190	11	12.8114
195	11	12.8114
200	13	15.1408
205	13	15.1408
210	13	15.1408
215	14	16.3055
220	14	16.3055
225	14	16.3055
230	14	16.3055
235	15	17.4701
240	15	17.4701
245	15	17.4701
250	16	18.6348
255	16	18.6348
260	16	18.6348
265	16	18.6348
270	17	19.7995
275	17	19.7995
280	17	19.7995
285	17	19.7995
290	17	19.7995
295	17	19.7995
300	17	19.7995

## Sheet: D8
					Temperature inside flux chamber, K	Volume of 1 mole of CO in standard conditions (0 deg C, 1 atm), L	Molecular weight of CO, g/mol	Emitting area enclosed by flux chamber (chamber footprint, A), m2	Volume of flux chamber (V), m3	dC/dt (slope)
					293	22.4	28	0.23	0.071	0.1429
Time (t), s	Measured concentration of CO, ppm	(C) measured CO concentration adjusted to standard conditions (0 deg C, 1 atm), mg/m3
0	0	0
5	3	3.49403
10	3	3.49403
15	3	3.49403
20	3	3.49403
25	3	3.49403
30	3	3.49403
35	5	5.82338
40	5	5.82338
45	7	8.15273
50	7	8.15273
55	8	9.31741
60	8	9.31741
65	9	10.4821
70	9	10.4821
75	10	11.6468
80	10	11.6468
85	10	11.6468			Q=(V/A)*(dC/dt)			where: Q - CO flux, mg/m2/s
90	13	15.1408						V - flux chamber volume, m3
95	13	15.1408						A - flux chamber footprint, m2
100	14	16.3055			Q=	0.0441126	mg CO/m2/s	dC/dt - rate of change of CO concentration in the flux chamber with time (from the chart), mg/m3/s
105	14	16.3055				158.805	mg CO/m2/h
110	15	17.4701
115	15	17.4701
120	17	19.7995
125	17	19.7995
130	17	19.7995
135	19	22.1288
140	19	22.1288
145	20	23.2935
150	20	23.2935
155	20	23.2935
160	20	23.2935
165	23	26.7875
170	23	26.7875
175	23	26.7875
180	25	29.1169
185	25	29.1169
190	25	29.1169
195	26	30.2816
200	26	30.2816
205	26	30.2816
210	27	31.4462
215	27	31.4462
220	27	31.4462
225	29	33.7756
230	29	33.7756
235	29	33.7756
240	30	34.9403
245	30	34.9403
250	33	38.4343
255	33	38.4343
260	33	38.4343
265	33	38.4343
270	35	40.7637
275	35	40.7637
280	35	40.7637
285	36	41.9283
290	36	41.9283
295	36	41.9283
300	36	41.9283

## Sheet: D9
					Temperature inside flux chamber, K	Volume of 1 mole of CO in standard conditions (0 deg C, 1 atm), L	Molecular weight of CO, g/mol	Emitting area enclosed by flux chamber (chamber footprint, A), m2	Volume of flux chamber (V), m3	dC/dt (slope)
					293	22.4	28	0.23	0.071	0.069
Time (t), s	Measured concentration of CO, ppm	(C) measured CO concentration adjusted to standard conditions (0 deg C, 1 atm), mg/m3
0	0	0
5	2	2.32935
10	2	2.32935
15	2	2.32935
20	2	2.32935
25	2	2.32935
30	3	3.49403
35	3	3.49403
40	3	3.49403
45	3	3.49403
50	3	3.49403
55	3	3.49403
60	3	3.49403
65	3	3.49403
70	4	4.6587
75	4	4.6587
80	4	4.6587
85	4	4.6587			Q=(V/A)*(dC/dt)			where: Q - CO flux, mg/m2/s
90	5	5.82338						V - flux chamber volume, m3
95	5	5.82338						A - flux chamber footprint, m2
100	5	5.82338			Q=	0.0213	mg CO/m2/s	dC/dt - rate of change of CO concentration in the flux chamber with time (from the chart), mg/m3/s
105	6	6.98805				76.68	mg CO/m2/h
110	6	6.98805
115	6	6.98805
120	7	8.15273
125	7	8.15273
130	7	8.15273
135	8	9.31741
140	8	9.31741
145	9	10.4821
150	9	10.4821
155	9	10.4821
160	10	11.6468
165	10	11.6468
170	10	11.6468
175	11	12.8114
180	11	12.8114
185	11	12.8114
190	12	13.9761
195	12	13.9761
200	12	13.9761
205	13	15.1408
210	13	15.1408
215	13	15.1408
220	14	16.3055
225	14	16.3055
230	14	16.3055
235	14	16.3055
240	15	17.4701
245	15	17.4701
250	15	17.4701
255	16	18.6348
260	16	18.6348
265	16	18.6348
270	16	18.6348
275	17	19.7995
280	17	19.7995
285	17	19.7995
290	17	19.7995
295	17	19.7995
300	17	19.7995

## Sheet: Modelling
Modelling of CO emission				Notes
Surface of the pile (Ap)		300	m2
Time (t)		3600	s	Accumulation of CO in airtight hall during time (t)
Headspace volume in the hall		1000	m3	Assumption: the hall is airtight
Number of piles in the hall (n)		4	-
Emitted CO mass in time (t)		71286.5	mg	Estimated as a product of (averaged flux at D1-D9 locations), Ap, t, and n
		71.2865	g	Conversion from mg to g
Concentration of accumulated CO in the hall headspace during 1 hour, estimated for the 'after' turning scenario		71.2865	mg/m3
Molecular weight of CO		28	g/mol
Air temperature in the hall		20	deg C
Ambient pressure		1	atm
Volume of 1 mole of CO in standard conditions (0 deg C, 1 atm)		22.4	L
Concentration of accumulated CO in the hall headspace during 1 hour, estimated for the 'after' turning scenario		83.0256	ppm
Concentration of accumulated CO in the hall headspace during 1 hour, estimated for the 'after' turning scenario		0.00830256	%
