# Supplementary material for: Assessment of Emissions and Potential Occupational Exposure to Carbon Monoxide during Biowaste Composting
Source: Preprints.org preprint supplement (doi:10.20944/preprints202306.1586.v1), 2023-06-22
Supplement: Supplementary file 34 [file Pile 4.1 after turning.xlsx]

## Sheet: D1
					Temperature inside flux chamber, K	Volume of 1 mole of CO in standard conditions (0 deg C, 1 atm), L	Molecular weight of CO, g/mol	Emitting area enclosed by flux chamber (chamber footprint, A), m2	Volume of flux chamber (V), m3	dC/dt (slope)
					293	22.4	28	0.23	0.071	0.0536
Time (t), s	Measured concentration of CO, ppm	(C) measured CO concentration adjusted to standard conditions (0 deg C, 1 atm), mg/m3
0	0	0
5	1	1.16468
10	1	1.16468
15	1	1.16468
20	3	3.49403
25	3	3.49403
30	3	3.49403
35	3	3.49403
40	3	3.49403
45	3	3.49403
50	3	3.49403
55	3	3.49403
60	4	4.6587
65	4	4.6587
70	4	4.6587
75	4	4.6587
80	5	5.82338
85	5	5.82338			Q=(V/A)*(dC/dt)			where: Q - CO flux, mg/m2/s
90	6	6.98805						V - flux chamber volume, m3
95	6	6.98805						A - flux chamber footprint, m2
100	7	8.15273			Q=	0.0165461	mg CO/m2/s	dC/dt - rate of change of CO concentration in the flux chamber with time (from the chart), mg/m3/s
105	7	8.15273				59.5659	mg CO/m2/h
110	7	8.15273
115	7	8.15273
120	7	8.15273
125	8	9.31741
130	8	9.31741
135	8	9.31741
140	8	9.31741
145	10	11.6468
150	10	11.6468
155	10	11.6468
160	11	12.8114
165	11	12.8114
170	11	12.8114
175	11	12.8114
180	12	13.9761
185	12	13.9761
190	12	13.9761
195	12	13.9761
200	12	13.9761
205	12	13.9761
210	11	12.8114
215	11	12.8114
220	11	12.8114
225	11	12.8114
230	11	12.8114
235	12	13.9761
240	12	13.9761
245	12	13.9761
250	12	13.9761
255	13	15.1408
260	13	15.1408
265	13	15.1408
270	13	15.1408
275	14	16.3055
280	14	16.3055
285	14	16.3055
290	14	16.3055
295	14	16.3055
300	14	16.3055

## Sheet: D2
					Temperature inside flux chamber, K	Volume of 1 mole of CO in standard conditions (0 deg C, 1 atm), L	Molecular weight of CO, g/mol	Emitting area enclosed by flux chamber (chamber footprint, A), m2	Volume of flux chamber (V), m3	dC/dt (slope)
					293	22.4	28	0.23	0.071	0.0555
Time (t), s	Measured concentration of CO, ppm	(C) measured CO concentration adjusted to standard conditions (0 deg C, 1 atm), mg/m3
0	0	0
5	0	0
10	2	2.32935
15	2	2.32935
20	3	3.49403
25	3	3.49403
30	3	3.49403
35	4	4.6587
40	4	4.6587
45	4	4.6587
50	5	5.82338
55	5	5.82338
60	5	5.82338
65	5	5.82338
70	5	5.82338
75	6	6.98805
80	6	6.98805
85	6	6.98805			Q=(V/A)*(dC/dt)			where: Q - CO flux, mg/m2/s
90	6	6.98805						V - flux chamber volume, m3
95	6	6.98805						A - flux chamber footprint, m2
100	7	8.15273			Q=	0.0171326	mg CO/m2/s	dC/dt - rate of change of CO concentration in the flux chamber with time (from the chart), mg/m3/s
105	7	8.15273				61.6774	mg CO/m2/h
110	7	8.15273
115	7	8.15273
120	7	8.15273
125	8	9.31741
130	8	9.31741
135	8	9.31741
140	8	9.31741
145	8	9.31741
150	8	9.31741
155	9	10.4821
160	9	10.4821
165	9	10.4821
170	10	11.6468
175	10	11.6468
180	11	12.8114
185	11	12.8114
190	11	12.8114
195	12	13.9761
200	12	13.9761
205	12	13.9761
210	12	13.9761
215	12	13.9761
220	12	13.9761
225	13	15.1408
230	13	15.1408
235	13	15.1408
240	13	15.1408
245	13	15.1408
250	14	16.3055
255	14	16.3055
260	14	16.3055
265	14	16.3055
270	15	17.4701
275	15	17.4701
280	15	17.4701
285	15	17.4701
290	15	17.4701
295	15	17.4701
300	15	17.4701

## Sheet: D3
					Temperature inside flux chamber, K	Volume of 1 mole of CO in standard conditions (0 deg C, 1 atm), L	Molecular weight of CO, g/mol	Emitting area enclosed by flux chamber (chamber footprint, A), m2	Volume of flux chamber (V), m3	dC/dt (slope)
					293	22.4	28	0.23	0.071	0.0503
Time (t), s	Measured concentration of CO, ppm	(C) measured CO concentration adjusted to standard conditions (0 deg C, 1 atm), mg/m3
0	0	0
5	0	0
10	1	1.16468
15	1	1.16468
20	2	2.32935
25	2	2.32935
30	2	2.32935
35	2	2.32935
40	3	3.49403
45	3	3.49403
50	4	4.6587
55	4	4.6587
60	4	4.6587
65	5	5.82338
70	5	5.82338
75	5	5.82338
80	5	5.82338
85	7	8.15273			Q=(V/A)*(dC/dt)			where: Q - CO flux, mg/m2/s
90	7	8.15273						V - flux chamber volume, m3
95	7	8.15273						A - flux chamber footprint, m2
100	8	9.31741			Q=	0.0155274	mg CO/m2/s	dC/dt - rate of change of CO concentration in the flux chamber with time (from the chart), mg/m3/s
105	8	9.31741				55.8986	mg CO/m2/h
110	8	9.31741
115	8	9.31741
120	8	9.31741
125	8	9.31741
130	9	10.4821
135	9	10.4821
140	9	10.4821
145	9	10.4821
150	10	11.6468
155	10	11.6468
160	10	11.6468
165	10	11.6468
170	10	11.6468
175	10	11.6468
180	11	12.8114
185	11	12.8114
190	11	12.8114
195	11	12.8114
200	11	12.8114
205	11	12.8114
210	11	12.8114
215	11	12.8114
220	11	12.8114
225	11	12.8114
230	12	13.9761
235	12	13.9761
240	12	13.9761
245	12	13.9761
250	12	13.9761
255	13	15.1408
260	13	15.1408
265	13	15.1408
270	13	15.1408
275	13	15.1408
280	13	15.1408
285	13	15.1408
290	13	15.1408
295	13	15.1408
300	13	15.1408

## Sheet: D4
					Temperature inside flux chamber, K	Volume of 1 mole of CO in standard conditions (0 deg C, 1 atm), L	Molecular weight of CO, g/mol	Emitting area enclosed by flux chamber (chamber footprint, A), m2	Volume of flux chamber (V), m3	dC/dt (slope)
					293	22.4	28	0.23	0.071	0.115
Time (t), s	Measured concentration of CO, ppm	(C) measured CO concentration adjusted to standard conditions (0 deg C, 1 atm), mg/m3
0	0	0
5	0	0
10	0	0
15	1	1.16468
20	1	1.16468
25	3	3.49403
30	3	3.49403
35	3	3.49403
40	3	3.49403
45	4	4.6587
50	4	4.6587
55	4	4.6587
60	5	5.82338
65	5	5.82338
70	5	5.82338
75	5	5.82338
80	5	5.82338
85	5	5.82338			Q=(V/A)*(dC/dt)			where: Q - CO flux, mg/m2/s
90	5	5.82338						V - flux chamber volume, m3
95	5	5.82338						A - flux chamber footprint, m2
100	9	10.4821			Q=	0.0355	mg CO/m2/s	dC/dt - rate of change of CO concentration in the flux chamber with time (from the chart), mg/m3/s
105	9	10.4821				127.8	mg CO/m2/h
110	11	12.8114
115	11	12.8114
120	11	12.8114
125	13	15.1408
130	13	15.1408
135	16	18.6348
140	16	18.6348
145	17	19.7995
150	17	19.7995
155	17	19.7995
160	17	19.7995
165	18	20.9642
170	19	22.1288
175	19	22.1288
180	22	25.6229
185	22	25.6229
190	23	26.7875
195	23	26.7875
200	25	29.1169
205	25	29.1169
210	25	29.1169
215	25	29.1169
220	25	29.1169
225	26	30.2816
230	26	30.2816
235	26	30.2816
240	25	29.1169
245	25	29.1169
250	25	29.1169
255	24	27.9522
260	24	27.9522
265	24	27.9522
270	24	27.9522
275	24	27.9522
280	23	26.7875
285	23	26.7875
290	23	26.7875
295	23	26.7875
300	23	26.7875

## Sheet: D5
					Temperature inside flux chamber, K	Volume of 1 mole of CO in standard conditions (0 deg C, 1 atm), L	Molecular weight of CO, g/mol	Emitting area enclosed by flux chamber (chamber footprint, A), m2	Volume of flux chamber (V), m3	dC/dt (slope)
					293	22.4	28	0.23	0.071	0.1165
Time (t), s	Measured concentration of CO, ppm	(C) measured CO concentration adjusted to standard conditions (0 deg C, 1 atm), mg/m3
0	0	0
5	4	4.6587
10	4	4.6587
15	4	4.6587
20	4	4.6587
25	4	4.6587
30	4	4.6587
35	4	4.6587
40	4	4.6587
45	4	4.6587
50	4	4.6587
55	4	4.6587
60	6	6.98805
65	6	6.98805
70	7	8.15273
75	8	9.31741
80	8	9.31741
85	10	11.6468			Q=(V/A)*(dC/dt)			where: Q - CO flux, mg/m2/s
90	10	11.6468						V - flux chamber volume, m3
95	10	11.6468						A - flux chamber footprint, m2
100	13	15.1408			Q=	0.035963	mg CO/m2/s	dC/dt - rate of change of CO concentration in the flux chamber with time (from the chart), mg/m3/s
105	13	15.1408				129.467	mg CO/m2/h
110	13	15.1408
115	15	17.4701
120	15	17.4701
125	15	17.4701
130	17	19.7995
135	17	19.7995
140	20	23.2935
145	20	23.2935
150	20	23.2935
155	20	23.2935
160	21	24.4582
165	21	24.4582
170	21	24.4582
175	22	25.6229
180	22	25.6229
185	22	25.6229
190	22	25.6229
195	22	25.6229
200	22	25.6229
205	24	27.9522
210	24	27.9522
215	24	27.9522
220	25	29.1169
225	25	29.1169
230	25	29.1169
235	26	30.2816
240	26	30.2816
245	26	30.2816
250	27	31.4462
255	27	31.4462
260	27	31.4462
265	28	32.6109
270	28	32.6109
275	28	32.6109
280	28	32.6109
285	28	32.6109
290	28	32.6109
295	28	32.6109
300	28	32.6109

## Sheet: D6
					Temperature inside flux chamber, K	Volume of 1 mole of CO in standard conditions (0 deg C, 1 atm), L	Molecular weight of CO, g/mol	Emitting area enclosed by flux chamber (chamber footprint, A), m2	Volume of flux chamber (V), m3	dC/dt (slope)
					293	22.4	28	0.23	0.071	0.0996
Time (t), s	Measured concentration of CO, ppm	(C) measured CO concentration adjusted to standard conditions (0 deg C, 1 atm), mg/m3
0	0	0
5	4	4.6587
10	4	4.6587
15	4	4.6587
20	4	4.6587
25	4	4.6587
30	4	4.6587
35	4	4.6587
40	4	4.6587
45	5	5.82338
50	5	5.82338
55	5	5.82338
60	5	5.82338
65	5	5.82338
70	5	5.82338
75	5	5.82338
80	5	5.82338
85	5	5.82338			Q=(V/A)*(dC/dt)			where: Q - CO flux, mg/m2/s
90	5	5.82338						V - flux chamber volume, m3
95	5	5.82338						A - flux chamber footprint, m2
100	5	5.82338			Q=	0.0307461	mg CO/m2/s	dC/dt - rate of change of CO concentration in the flux chamber with time (from the chart), mg/m3/s
105	5	5.82338				110.686	mg CO/m2/h
110	5	5.82338
115	5	5.82338
120	6	6.98805
125	6	6.98805
130	7	8.15273
135	7	8.15273
140	9	10.4821
145	9	10.4821
150	9	10.4821
155	10	11.6468
160	10	11.6468
165	11	12.8114
170	11	12.8114
175	11	12.8114
180	12	13.9761
185	12	13.9761
190	13	15.1408
195	14	16.3055
200	15	17.4701
205	18	20.9642
210	20	23.2935
215	20	23.2935
220	21	24.4582
225	21	24.4582
230	21	24.4582
235	23	26.7875
240	23	26.7875
245	23	26.7875
250	23	26.7875
255	23	26.7875
260	23	26.7875
265	23	26.7875
270	24	27.9522
275	24	27.9522
280	24	27.9522
285	24	27.9522
290	24	27.9522
295	24	27.9522
300	24	27.9522

## Sheet: D7
					Temperature inside flux chamber, K	Volume of 1 mole of CO in standard conditions (0 deg C, 1 atm), L	Molecular weight of CO, g/mol	Emitting area enclosed by flux chamber (chamber footprint, A), m2	Volume of flux chamber (V), m3	dC/dt (slope)
					293	22.4	28	0.23	0.071	0.0832
Time (t), s	Measured concentration of CO, ppm	(C) measured CO concentration adjusted to standard conditions (0 deg C, 1 atm), mg/m3
0	0	0
5	2	2.32935
10	2	2.32935
15	2	2.32935
20	2	2.32935
25	2	2.32935
30	2	2.32935
35	2	2.32935
40	2	2.32935
45	3	3.49403
50	3	3.49403
55	5	5.82338
60	5	5.82338
65	5	5.82338
70	6	6.98805
75	6	6.98805
80	7	8.15273
85	7	8.15273			Q=(V/A)*(dC/dt)			where: Q - CO flux, mg/m2/s
90	7	8.15273						V - flux chamber volume, m3
95	7	8.15273						A - flux chamber footprint, m2
100	7	8.15273			Q=	0.0256835	mg CO/m2/s	dC/dt - rate of change of CO concentration in the flux chamber with time (from the chart), mg/m3/s
105	7	8.15273				92.4605	mg CO/m2/h
110	8	9.31741
115	10	11.6468
120	10	11.6468
125	10	11.6468
130	10	11.6468
135	11	12.8114
140	11	12.8114
145	12	13.9761
150	12	13.9761
155	13	15.1408
160	13	15.1408
165	13	15.1408
170	16	18.6348
175	16	18.6348
180	16	18.6348
185	16	18.6348
190	16	18.6348
195	17	19.7995
200	17	19.7995
205	17	19.7995
210	17	19.7995
215	17	19.7995
220	17	19.7995
225	19	22.1288
230	19	22.1288
235	18	20.9642
240	18	20.9642
245	18	20.9642
250	18	20.9642
255	18	20.9642
260	18	20.9642
265	18	20.9642
270	18	20.9642
275	20	23.2935
280	20	23.2935
285	20	23.2935
290	20	23.2935
295	20	23.2935
300	20	23.2935

## Sheet: D8
					Temperature inside flux chamber, K	Volume of 1 mole of CO in standard conditions (0 deg C, 1 atm), L	Molecular weight of CO, g/mol	Emitting area enclosed by flux chamber (chamber footprint, A), m2	Volume of flux chamber (V), m3	dC/dt (slope)
					293	22.4	28	0.23	0.071	0.0734
Time (t), s	Measured concentration of CO, ppm	(C) measured CO concentration adjusted to standard conditions (0 deg C, 1 atm), mg/m3
0	0	0
5	3	3.49403
10	3	3.49403
15	3	3.49403
20	3	3.49403
25	3	3.49403
30	3	3.49403
35	3	3.49403
40	3	3.49403
45	3	3.49403
50	3	3.49403
55	3	3.49403
60	3	3.49403
65	3	3.49403
70	3	3.49403
75	4	4.6587
80	4	4.6587
85	5	5.82338			Q=(V/A)*(dC/dt)			where: Q - CO flux, mg/m2/s
90	5	5.82338						V - flux chamber volume, m3
95	5	5.82338						A - flux chamber footprint, m2
100	5	5.82338			Q=	0.0226583	mg CO/m2/s	dC/dt - rate of change of CO concentration in the flux chamber with time (from the chart), mg/m3/s
105	7	8.15273				81.5697	mg CO/m2/h
110	7	8.15273
115	7	8.15273
120	7	8.15273
125	8	9.31741
130	8	9.31741
135	8	9.31741
140	9	10.4821
145	9	10.4821
150	10	11.6468
155	10	11.6468
160	10	11.6468
165	11	12.8114
170	11	12.8114
175	11	12.8114
180	12	13.9761
185	12	13.9761
190	13	15.1408
195	13	15.1408
200	13	15.1408
205	14	16.3055
210	14	16.3055
215	14	16.3055
220	14	16.3055
225	14	16.3055
230	14	16.3055
235	14	16.3055
240	17	19.7995
245	17	19.7995
250	17	19.7995
255	17	19.7995
260	18	20.9642
265	18	20.9642
270	18	20.9642
275	18	20.9642
280	18	20.9642
285	18	20.9642
290	18	20.9642
295	18	20.9642
300	18	20.9642

## Sheet: D9
					Temperature inside flux chamber, K	Volume of 1 mole of CO in standard conditions (0 deg C, 1 atm), L	Molecular weight of CO, g/mol	Emitting area enclosed by flux chamber (chamber footprint, A), m2	Volume of flux chamber (V), m3	dC/dt (slope)
					293	22.4	28	0.23	0.071	0.0973
Time (t), s	Measured concentration of CO, ppm	(C) measured CO concentration adjusted to standard conditions (0 deg C, 1 atm), mg/m3
0	0	0
5	6	6.98805
10	6	6.98805
15	6	6.98805
20	6	6.98805
25	6	6.98805
30	6	6.98805
35	6	6.98805
40	6	6.98805
45	6	6.98805
50	7	8.15273
55	7	8.15273
60	7	8.15273
65	7	8.15273
70	8	9.31741
75	8	9.31741
80	8	9.31741
85	9	10.4821			Q=(V/A)*(dC/dt)			where: Q - CO flux, mg/m2/s
90	9	10.4821						V - flux chamber volume, m3
95	8	9.31741						A - flux chamber footprint, m2
100	9	10.4821			Q=	0.0300361	mg CO/m2/s	dC/dt - rate of change of CO concentration in the flux chamber with time (from the chart), mg/m3/s
105	9	10.4821				108.13	mg CO/m2/h
110	10	11.6468
115	10	11.6468
120	12	13.9761
125	13	15.1408
130	14	16.3055
135	15	17.4701
140	16	18.6348
145	17	19.7995
150	17	19.7995
155	18	20.9642
160	18	20.9642
165	19	22.1288
170	19	22.1288
175	19	22.1288
180	20	23.2935
185	20	23.2935
190	20	23.2935
195	20	23.2935
200	21	24.4582
205	21	24.4582
210	21	24.4582
215	21	24.4582
220	21	24.4582
225	23	26.7875
230	23	26.7875
235	23	26.7875
240	23	26.7875
245	24	27.9522
250	24	27.9522
255	24	27.9522
260	24	27.9522
265	24	27.9522
270	24	27.9522
275	26	30.2816
280	26	30.2816
285	26	30.2816
290	26	30.2816
295	26	30.2816
300	26	30.2816

## Sheet: Modelling
Modelling of CO emission				Notes
Surface of the pile (Ap)		300	m2
Time (t)		3600	s	Accumulation of CO in airtight hall during time (t)
Headspace volume in the hall		1000	m3	Assumption: the hall is airtight
Number of piles in the hall (n)		4	-
Emitted CO mass in time (t)		110301	mg	Estimated as a product of (averaged flux at D1-D9 locations), Ap, t, and n
		110.301	g	Conversion from mg to g
Concentration of accumulated CO in the hall headspace during 1 hour, estimated for the 'after' turning scenario		110.301	mg/m3
Molecular weight of CO		28	g/mol
Air temperature in the hall		20	deg C
Ambient pressure		1	atm
Volume of 1 mole of CO in standard conditions (0 deg C, 1 atm)		22.4	L
Concentration of accumulated CO in the hall headspace during 1 hour, estimated for the 'after' turning scenario		128.465	ppm
Concentration of accumulated CO in the hall headspace during 1 hour, estimated for the 'after' turning scenario		0.0128465	%
